# Supplementary material for: Copper-catalyzed synthesis of trifluoromethyl-substituted isoxazolines
Source: Royal Society of Chemistry journal article supplement (doi:10.1039/c3cc42588f), 2013-01-01

# Supporting Information

## Copper-Catalyzed Synthesis of Trifluoromethyl-Substituted Isoxazolines

Yu-Tao He, Lian-Hua Li, Yan-Fang Yang, Yu-Qi Wang, Jian-Yi Luo, Xue-Yuan Liu, and Yong-Min Liang\*

*State Key Laboratory of Applied Organic Chemistry, Lanzhou University*

*Lanzhou 730000, P.R. China.*

*E-mail: liangym@lzu.edu.cn*

### Table of Contents

|           |                                                                                                                  |                |
|-----------|------------------------------------------------------------------------------------------------------------------|----------------|
| <b>1</b>  | <b>General remarks</b>                                                                                           | <b>S2</b>      |
| <b>2</b>  | <b>General procedure for the synthesis of ketoximes</b>                                                          | <b>S2</b>      |
| <b>3</b>  | <b>Characterization data</b>                                                                                     | <b>S3- S4</b>  |
| <b>4</b>  | <b>Table S1. Optimization of the reaction conditions</b>                                                         | <b>S4- S5</b>  |
| <b>5</b>  | <b>General experimental procedure</b>                                                                            | <b>S6</b>      |
| <b>6</b>  | <b>Characterization data of 3a-3q, and 3s</b>                                                                    | <b>S6-S11</b>  |
| <b>7</b>  | <b>References</b>                                                                                                | <b>S12</b>     |
| <b>8</b>  | <b>Crystallographic data of 3a</b>                                                                               | <b>S13</b>     |
| <b>9</b>  | <b><sup>1</sup>H NMR and <sup>13</sup>C NMR spectra for substrates 1d, 1g, 1h, 1l, 1m</b>                        | <b>S14-S23</b> |
| <b>10</b> | <b><sup>1</sup>H NMR, <sup>13</sup>C NMR, <sup>19</sup>F NMR spectra and 1D-NOESY for products 3a-3q, and 3s</b> | <b>S24-S82</b> |

## 1. General remarks

Column chromatography was carried out on silica gel and analytical TLC was performed with silica gel GF254 plates. NMR spectra were recorded in CDCl<sub>3</sub> at 400 MHz (<sup>1</sup>H NMR), 100 MHz (<sup>13</sup>C NMR) and 376 MHz (<sup>19</sup>F NMR). IR spectra were recorded on a FT-IR spectrometer and only major peaks are reported in cm<sup>-1</sup>. Data collections for crystal structure were performed at room temperature (293 K) using MoK $\alpha$  radiation on a Bruker APEXII diffractometer. All trifluoromethylation products were further characterized by high resolution mass spectra (HRMS); copies of their <sup>1</sup>H NMR and <sup>13</sup>C NMR spectra are provided. DMF were dried by MgSO<sub>4</sub> and distilled under reduced pressure before used.

## 2. General procedure for the synthesis of ketoximes

### Procedure for the synthesis of ketoxime 1a-1h, 1j-1n:

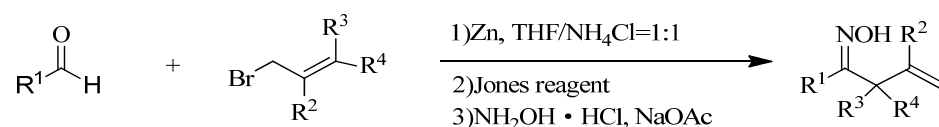

1) Aldehyde (1.0 equiv) was dissolved in anhydrous THF. A sample was taken out for analysis and allylbromide (2.0 equiv) was added. Another sample was taken out for analysis and saturated aqueous NH<sub>4</sub>Cl was added. Portions of activated zinc dust (2.0 equiv) were added slowly on at 0°C and the resulting suspension was stirred overnight at this temperature. The THF layer was separated from the aqueous layer, which was extracted with diethyl ether for 3 times. The combined organic layers were washed with brine, dried over Na<sub>2</sub>SO<sub>4</sub>, filtered and concentrated in *vacuo*. The crude product was directly used in the next step without further purification.<sup>[1]</sup>

2) A solution of the homoallylic alcohol (1.0 equiv) in diethyl ether was stirred at 0°C while Jones reagent (2.0-4.0 equiv) was added dropwise. The resulting mixture was allowed to warm to room temperature and stirred for 1 h. The diethyl ether layer was then separated from the aqueous layer, which was extracted with diethyl ether for 3 times. The combined diethyl ether layers were washed with brine, dried over Na<sub>2</sub>SO<sub>4</sub>, filtered and concentrated in *vacuo*. The crude product was directly used in the next step without further purification.<sup>[2]</sup>

3) To a solution of hydroxylamine hydrochloride (5.0 equiv) in water was added a solution of sodium acetate (7.0 equiv) in ethanol. The mixture was stirred at room temperature while the  $\beta,\gamma$ -unsaturated ketone (1.0 equiv) was added as a solution in ethanol. The mixture was stirred overnight and concentrated in *vacuo*. Then, the mixture was extracted with ethyl acetate 3 times and the combined extracts were washed with water and brine, dried (Mg<sub>2</sub>SO<sub>4</sub>), filtered, and concentrated in *vacuo*. The crude material was purified by flash chromatography on silica gel to afford the  $\beta,\gamma$ -unsaturated oxime.<sup>[2]</sup>

### Procedure for the synthesis of ketoxime 1i, and 1o-1q:

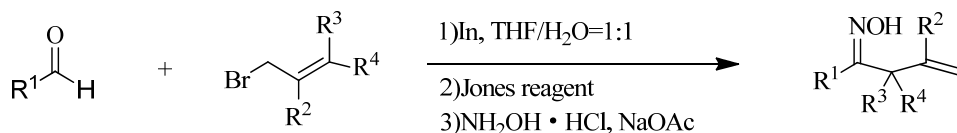

1) A round bottomed flask charged with a solution of the 3-bromo-2-methylprop-1-ene (1.1 equiv) or its analogue and indium (1.1 equiv) in THF/H<sub>2</sub>O (1:1) was kept at room temperature with stirring. The aldehyde (1.0 equiv) was added to the solution and the resulting suspension was stirred for 10-24 h. Saturated ammonium chloride or 1 N hydrochloride solution was added at 0°C. The THF layer was separated from the aqueous layer, which was extracted with diethyl ether for 3 times. The combined organic layers were washed with brine, dried over Na<sub>2</sub>SO<sub>4</sub>, filtered and concentrated in *vacuo*. The crude product was directly used in the next step without further purification.<sup>[3]</sup>

Steps 2) and 3) are same as above-mentioned.

#### Procedure for the synthesis of ketoxime 1r:

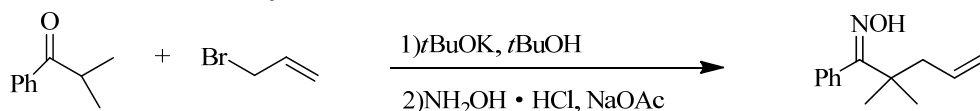

1) A mixture of isobutyrophenone (1.0 equiv), allyl bromide (1.1 equiv) and potassium *t*-butoxide (1.1 equiv) in *t*-butyl alcohol was heated at reflux for 2.5 h under a nitrogen atmosphere. Afterwards *t*-butanol was removed by distillation and the crude mixture was extracted with ethyl acetate 3 times and the combined extracts were washed with water and brine, dried (Mg<sub>2</sub>SO<sub>4</sub>), filtered, and concentrated in *vacuo*. The crude material was purified by flash chromatography on silica gel to afford the ketoxime 1s.<sup>[5]</sup>

Steps 2) is the same as above-mentioned.

#### Procedure for the synthesis of ketoxime 1s:

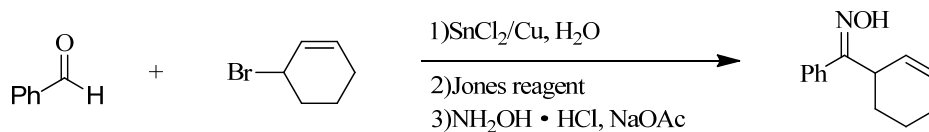

1) Cyclohex-2-en-1-yl(phenyl)methanol were prepared through the reaction SnCl<sub>2</sub>·H<sub>2</sub>O, copper powder, benzaldehyde and primary 3-bromocyclohex-1-ene in water at the room temperature according to the literature procedure.<sup>[6]</sup>

Steps 2) and 3) are same as above-mentioned.

### 3. Characterization data

#### 1-(*m*-tolyl)but-3-en-1-one oxime 1d

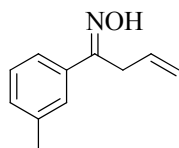

Colorless solid;  $^1\text{H}$  NMR (400 MHz,  $\text{CDCl}_3$ )  $\delta$  ppm 9.96(s, 1H), 7.44-7.41 (m, 2H), 7.27-7.14 (m, 2H), 5.97-5.90 (m, 1H), 5.19-5.08 (m, 2H), 3.58 (d,  $J = 5.6$  Hz, 2H), 2.35 (s, 3H);  $^{13}\text{C}$  NMR (100 MHz,  $\text{CDCl}_3$ )  $\delta$  ppm 156.9, 138.1, 135.5, 132.1, 130.0, 128.4, 127.0, 123.5, 117.0, 31.2, 21.4.

**1-(3-chlorophenyl)but-3-en-1-one oxime 1g**

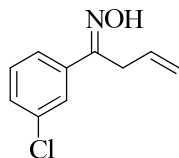

Colorless oil;  $^1\text{H}$  NMR (400 MHz,  $\text{CDCl}_3$ )  $\delta$  ppm 9.16 (d,  $J = 19.6$  Hz, 1H), 7.62-7.61 (m, 1H), 7.52-7.49 (m, 1H), 7.36-7.25 (m, 2H), 5.97-5.87 (m, 1H), 5.19-5.11 (m, 2H), 3.58-3.55 (m, 2H);  $^{13}\text{C}$  NMR (100 MHz,  $\text{CDCl}_3$ )  $\delta$  ppm 155.9, 137.3, 134.6, 131.6, 129.8, 129.3, 126.5, 124.5, 117.4, 30.9.

**1-(2-fluorophenyl)but-3-en-1-one oxime 1h**

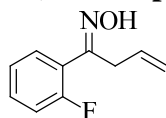

Colorless oil;  $^1\text{H}$  NMR (400 MHz,  $\text{CDCl}_3$ )  $\delta$  ppm 10.24 (s, 1H), 7.45-7.41 (m, 1H), 7.35-7.30 (m, 1H), 7.22-7.05 (m, 2H), 5.88-5.78 (m, 1H), 5.14-5.03 (m, 2H), 3.57 (d,  $J = 6.4$  Hz, 2H);  $^{13}\text{C}$  NMR (100 MHz,  $\text{CDCl}_3$ )  $\delta$  ppm 160.2 (d,  $J = 249.0$  Hz), 154.9 (d,  $J = 2.0$  Hz), 131.5, 130.7 (d,  $J = 8.0$  Hz), 129.9 (d,  $J = 3.0$  Hz), 124.2 (d,  $J = 4.0$  Hz), 123.9 (d,  $J = 12.0$  Hz), 117.6, 116.2 (d,  $J = 22.0$  Hz), 32.8 (d,  $J = 3.0$  Hz).

**1-(furan-2-yl)but-3-en-1-one oxime 1l**

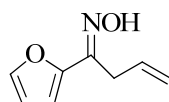

Colorless solid;  $^1\text{H}$  NMR (400 MHz,  $\text{CDCl}_3$ )  $\delta$  ppm 9.50 (s, 1H), 7.48-7.46(m, 2H), 6.55-6.54 (m, 1H), 6.04-5.97 (m, 1H), 5.23-5.11 (m, 2H), 3.45 (d,  $J = 6.8$  Hz, 2H);  $^{13}\text{C}$  NMR (100 MHz,  $\text{CDCl}_3$ )  $\delta$  ppm 146.0, 145.3, 142.6, 133.6, 118.4, 117.4, 112.1, 35.8.

**1-(thiophen-2-yl)but-3-en-1-one oxime 1m**

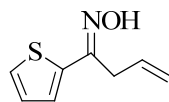

Colorless solid;  $^1\text{H}$  NMR (400 MHz,  $\text{CDCl}_3$ )  $\delta$  ppm 9.25 (s, 1H), 7.28 (d,  $J = 4.4$  Hz, 2H), 7.02 (t,  $J = 4.4$  Hz, 1H), 5.99-5.92 (m, 1H), 5.24-5.11 (m, 2H), 3.60 (d,  $J = 6.4$  Hz, 2H);  $^{13}\text{C}$  NMR (100 MHz,  $\text{CDCl}_3$ )  $\delta$  ppm 152.7, 139.1, 131.7, 127.2, 126.9, 126.8, 117.4, 31.3.

**4. Table S1. Optimization of the reaction conditions <sup>a</sup>**

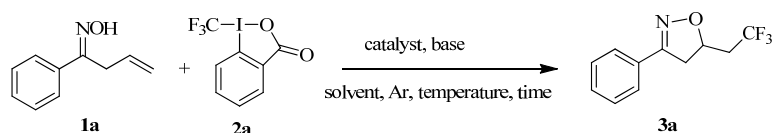

| Entry          | Catalyst (mol %)                                            | Base (equiv)                          | Temperature (°C) | Time (h)   | Solvent            | Yield (%) <sup>b</sup> |
|----------------|-------------------------------------------------------------|---------------------------------------|------------------|------------|--------------------|------------------------|
| 1              | CuCl (20)                                                   | KF (1.2)                              | 50               | 0.5        | DMF                | 65                     |
| 2 <sup>c</sup> | CuCl (20)                                                   | KF (1.2)                              | 50               | 0.5        | DMF                | 0                      |
| 3 <sup>d</sup> | CuCl (20)                                                   | KF (1.2)                              | 50               | 0.5        | DMF                | 0                      |
| 4 <sup>e</sup> | —                                                           | KF (1.2)                              | 50               | 0.5        | DMF                | 0                      |
| 5              | Cu(OTf) <sub>2</sub> (20)                                   | KF (1.2)                              | 50               | 0.5        | DMF                | 18                     |
| 6              | Cu(OAc) <sub>2</sub> (20)                                   | KF (1.2)                              | 50               | 0.5        | DMF                | 40                     |
| 7              | [Cu(OTf) <sub>2</sub> ·C <sub>6</sub> H <sub>6</sub> ] (20) | KF (1.2)                              | 50               | 0.5        | DMF                | 10                     |
| 8              | CuCl <sub>2</sub> (20)                                      | KF (1.2)                              | 50               | 0.5        | DMF                | 59                     |
| 9              | Cu(CH <sub>3</sub> CN) <sub>4</sub> F <sub>6</sub>          | KF (1.2)                              | 50               | 0.5        | DMF                | 18                     |
| 10             | CuI (20)                                                    | KF (1.2)                              | 50               | 0.5        | DMF                | 62                     |
| 11             | CuBr (20)                                                   | KF (1.2)                              | 50               | 0.5        | DMF                | 61                     |
| 12             | CuCl (20)                                                   | K <sub>3</sub> PO <sub>4</sub> (1.2)  | 50               | 0.5        | DMF                | 73                     |
| 13             | CuCl (20)                                                   | K <sub>2</sub> CO <sub>3</sub> (1.2)  | 50               | 0.5        | DMF                | 70                     |
| 14             | CuCl (20)                                                   | Cs <sub>2</sub> CO <sub>3</sub> (1.2) | 50               | 0.5        | DMF                | 59                     |
| 15             | CuCl (20)                                                   | <i>t</i> -BuOK (1.2)                  | 50               | 0.5        | DMF                | 59                     |
| 16             | CuCl (20)                                                   | Et <sub>3</sub> N (1.2)               | 50               | 0.5        | DMF                | 69                     |
| <b>17</b>      | <b>CuCl (20)</b>                                            | <b>NaOAc (1.2)</b>                    | <b>50</b>        | <b>0.5</b> | <b>DMF</b>         | <b>79</b>              |
| 18             | CuCl (10)                                                   | NaOAc (1.2)                           | 50               | 0.5        | DMF                | 66                     |
| 19             | CuCl (50)                                                   | NaOAc (1.2)                           | 50               | 0.5        | DMF                | 77                     |
| 20             | CuCl (100)                                                  | NaOAc (1.2)                           | 50               | 0.5        | DMF                | 77                     |
| 21             | CuCl (20)                                                   | NaOAc (1.0)                           | 50               | 0.5        | DMF                | 75                     |
| 22             | CuCl (20)                                                   | NaOAc (1.5)                           | 50               | 0.5        | DMF                | 79                     |
| 23             | CuCl (20)                                                   | NaOAc (2.0)                           | 50               | 0.5        | DMF                | 78                     |
| 24             | CuCl (20)                                                   | NaOAc (3.0)                           | 50               | 0.5        | DMF                | 76                     |
| 25             | CuCl (20)                                                   | NaOAc (1.2)                           | 50               | 1.0        | DMF                | 77                     |
| 26             | CuCl (20)                                                   | NaOAc (1.2)                           | 50               | 2.0        | DMF                | 78                     |
| 27             | CuCl (20)                                                   | NaOAc (1.2)                           | 50               | 5.0        | DMF                | 78                     |
| 28             | CuCl (20)                                                   | NaOAc (1.2)                           | 40               | 0.5        | DMF                | 74                     |
| 29             | CuCl (20)                                                   | NaOAc (1.2)                           | 60               | 0.5        | DMF                | 78                     |
| 30             | CuCl (20)                                                   | NaOAc (1.2)                           | 80               | 0.5        | DMF                | 79                     |
| 31             | CuCl (20)                                                   | NaOAc (1.2)                           | 50               | 0.5        | CH <sub>3</sub> CN | 42                     |
| 32             | CuCl (20)                                                   | NaOAc (1.2)                           | 50               | 0.5        | THF                | 30                     |
| 33             | CuCl (20)                                                   | NaOAc (1.2)                           | 50               | 0.5        | NMP                | 70                     |
| 34             | CuCl (20)                                                   | NaOAc (1.2)                           | 50               | 0.5        | DMSO               | 69                     |
| 35             | CuCl (20)                                                   | NaOAc (1.2)                           | 50               | 0.5        | DMAC               | 67                     |
| 36             | CuCl (20)                                                   | NaOAc (1.2)                           | 50               | 0.5        | toluene            | trace                  |
| 37             | CuCl (20)                                                   | NaOAc (1.2)                           | 50               | 0.5        | 1,4-dioxane        | 20                     |

<sup>a</sup> Reaction conditions: **1a** (0.2 mmol), **2a** (0.3 mmol), copper catalyst, base, solvent (3 mL), temperature, time, under argon. <sup>b</sup> Isolated yield. <sup>c</sup> TMSCF<sub>3</sub> was used. <sup>d</sup> Umemoto reagent **2b** was used. <sup>e</sup> Without CuCl.

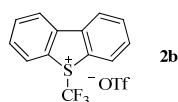

## 5. General experimental procedure

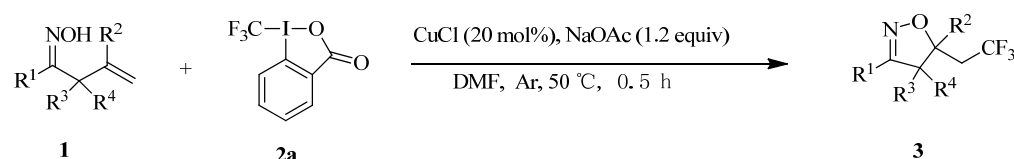

DMF (3 mL) was added to ketoxime **1** (0.2 mmol, 1.0 equiv), Togni-reagent **2a** (0.3 mmol, 1.5 equiv), NaOAc (0.24 mmol, 1.2 equiv) and CuCl (0.04 mmol, 0.2 equiv) under Argon. The mixture was stirred for 0.5 hours at 50 °C and extracted with ethyl acetate. The combined organic layers were washed with saturated brine, dried over Na<sub>2</sub>SO<sub>4</sub>, concentrated in *vacuo* and purified by flash column chromatography (silica gel) to afford the product **3**.

## 6. Characterization data of 3a-3q, and 3s

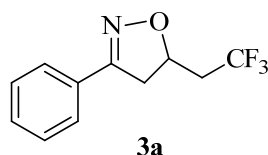

**3-phenyl-5-(2,2,2-trifluoroethyl)-4,5-dihydroisoxazole 3a**: Solid, <sup>1</sup>H NMR (400 MHz, CDCl<sub>3</sub>) δ ppm 7.68-7.66 (m, 2H), 7.43-7.39 (m, 3H), 5.01-4.97 (m, 1H), 3.60-3.53 (m, 1H), 3.20-3.14 (m, 1H), 2.77-2.69 (m, 1H), 2.48-2.40 (m, 1H). <sup>13</sup>C NMR (100 MHz, CDCl<sub>3</sub>) δ ppm 156.6, 130.4, 128.9, 128.8, 126.7, 125.2 (q, *J* = 275.0 Hz, CF<sub>3</sub>), 74.7 (d, *J* = 3.0 Hz), 40.4, 39.1 (q, *J* = 27.0 Hz, CH<sub>2</sub>CF<sub>3</sub>). <sup>19</sup>F NMR (376 MHz, CDCl<sub>3</sub>): δ -63.82 (s, 3F). IR (neat, cm<sup>-1</sup>): 3395, 2923, 2361, 1384, 1076, 767, 672. HRMS (ESI) Calcd for C<sub>11</sub>H<sub>10</sub>F<sub>3</sub>NO: M+H = 230.0787. Found: 230.0784.

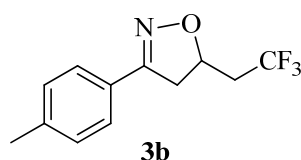

**3-(p-tolyl)-5-(2,2,2-trifluoroethyl)-4,5-dihydroisoxazole 3b**: Solid, <sup>1</sup>H NMR (400 MHz, CDCl<sub>3</sub>) δ ppm 7.56 (d, *J* = 8.4 Hz, 2H), 7.22 (d, *J* = 8.0 Hz, 2H), 5.00-4.92 (m, 1H), 3.57-3.50 (m, 1H), 3.17-3.10 (m, 1H), 2.75-2.67 (m, 1H), 2.47-2.39 (m, 4H). <sup>13</sup>C NMR (100 MHz, CDCl<sub>3</sub>) δ ppm 156.5, 140.7, 129.4, 126.6, 126.0, 125.3 (q, *J* = 275.0 Hz, CF<sub>3</sub>), 74.6 (d, *J* = 3.0 Hz), 40.5, 39.3 (q, *J* = 28.0 Hz, CH<sub>2</sub>CF<sub>3</sub>), 21.4. <sup>19</sup>F NMR (376 MHz, CDCl<sub>3</sub>): δ -63.85 (s, 3F). IR (neat, cm<sup>-1</sup>): 3437, 2931, 2360, 1407, 1279, 1150, 823, 661. HRMS (ESI) Calcd for C<sub>12</sub>H<sub>12</sub>F<sub>3</sub>NO: M+H = 244.0944. Found: 244.0947.

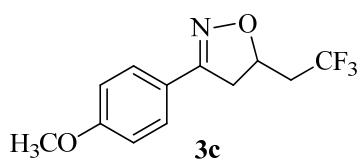

**3-(4-methoxyphenyl)-5-(2,2,2-trifluoroethyl)-4,5-dihydroisoxazole 3c**: Solid, <sup>1</sup>H

NMR (400 MHz, CDCl<sub>3</sub>)  $\delta$  ppm 7.60 (d,  $J$  = 8.8 Hz, 2H), 6.93 (d,  $J$  = 8.8 Hz, 2H), 4.99-4.91 (m, 1H), 3.84 (s, 3H), 3.56-3.50 (m, 1H), 3.16-3.10 (m, 1H), 2.75-2.67 (m, 1H), 2.47-2.39 (m, 1H). <sup>13</sup>C NMR (100 MHz, CDCl<sub>3</sub>)  $\delta$  ppm 161.3, 156.1, 128.3, 128.1, 125.3 (q,  $J$  = 275.0 Hz, CF<sub>3</sub>), 114.2, 74.5, 55.3, 40.6, 39.1 (q,  $J$  = 27.0 Hz, CH<sub>2</sub>CF<sub>3</sub>). <sup>19</sup>F NMR (376 MHz, CDCl<sub>3</sub>):  $\delta$  -63.84 (s, 3F). IR (neat, cm<sup>-1</sup>): 3438, 2924, 1516, 1256, 1118, 1040, 838, 658. HRMS (ESI) Calcd for C<sub>12</sub>H<sub>12</sub>F<sub>3</sub>NO<sub>2</sub>: M+H = 260.0893. Found: 260.0890.

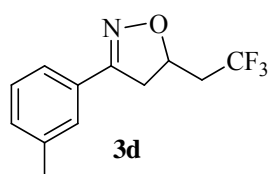

**3-(m-tolyl)-5-(2,2,2-trifluoroethyl)-4,5-dihydroisoxazole 3d:** Solid, <sup>1</sup>H NMR (400 MHz, CDCl<sub>3</sub>)  $\delta$  ppm 7.50-7.43 (m, 2H), 7.32-7.23 (m, 2H), 5.00-4.92 (m, 1H), 3.57-3.50 (m, 1H), 3.17-3.11 (m, 1H), 2.75-2.67 (m, 1H), 2.46-2.38 (m, 4H). <sup>13</sup>C NMR (100 MHz, CDCl<sub>3</sub>)  $\delta$  ppm 156.7, 138.5, 131.2, 128.8, 128.7, 127.3, 125.3 (q,  $J$  = 275.0 Hz, CF<sub>3</sub>), 123.9, 74.7 (d,  $J$  = 3.0 Hz), 40.5, 39.1 (q,  $J$  = 28.0 Hz, CH<sub>2</sub>CF<sub>3</sub>), 21.3. <sup>19</sup>F NMR (376 MHz, CDCl<sub>3</sub>):  $\delta$  -63.83 (s, 3F). IR (neat, cm<sup>-1</sup>): 3396, 2924, 2361, 1385, 1255, 1113, 912, 792. HRMS (ESI) Calcd for C<sub>12</sub>H<sub>12</sub>F<sub>3</sub>NO: M+H = 244.0944. Found: 244.0941.

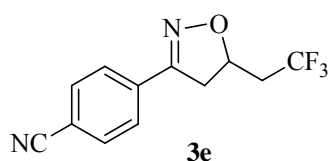

**4-(5-(2,2,2-trifluoroethyl)-4,5-dihydroisoxazol-3-yl)benzonitrile 3e:** Solid, <sup>1</sup>H NMR (400 MHz, CDCl<sub>3</sub>)  $\delta$  ppm 7.78-7.70 (m, 2H), 5.10-5.02 (m, 1H), 3.61-3.54 (m, 1H), 3.20-3.14 (m, 1H), 2.79-2.71 (m, 1H), 2.52-2.44 (m, 1H). <sup>13</sup>C NMR (100 MHz, CDCl<sub>3</sub>)  $\delta$  ppm 155.3, 133.2, 132.5, 127.1, 125.0 (q,  $J$  = 275.0 Hz, CF<sub>3</sub>), 118.1, 113.7, 75.7 (d,  $J$  = 3.0 Hz), 39.7, 39.0 (q,  $J$  = 28.0 Hz, CH<sub>2</sub>CF<sub>3</sub>). <sup>19</sup>F NMR (376 MHz, CDCl<sub>3</sub>):  $\delta$  -63.81 (s, 3F). IR (neat, cm<sup>-1</sup>): 3439, 2922, 2361, 1388, 1253, 1114, 915, 837. HRMS (ESI) Calcd for C<sub>12</sub>H<sub>9</sub>F<sub>3</sub>N<sub>2</sub>O: M+H = 255.0740. Found: 255.0743.

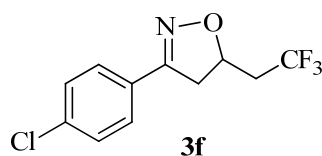

**3-(4-chlorophenyl)-5-(2,2,2-trifluoroethyl)-4,5-dihydroisoxazole 3f:** Solid, <sup>1</sup>H NMR (400 MHz, CDCl<sub>3</sub>)  $\delta$  ppm 7.60 (d,  $J$  = 8.4 Hz, 2H), 7.39 (d,  $J$  = 8.8 Hz, 2H), 5.04-4.96 (m, 1H), 3.57-3.51 (m, 1H), 3.17-3.11 (m, 1H), 2.77-2.67 (m, 1H), 2.52-2.41 (m, 1H). <sup>13</sup>C NMR (100 MHz, CDCl<sub>3</sub>)  $\delta$  ppm 155.7, 136.5, 129.1, 127.9, 127.4, 125.2 (q,  $J$  = 275.0 Hz, CF<sub>3</sub>), 75.07, 40.3, 39.0 (q,  $J$  = 28.0 Hz, CH<sub>2</sub>CF<sub>3</sub>). <sup>19</sup>F NMR (376 MHz, CDCl<sub>3</sub>):  $\delta$  -63.84 (s, 3F). IR (neat, cm<sup>-1</sup>): 3437, 2950, 1403, 1247,

1156, 1077, 819, 654. HRMS (ESI) Calcd for  $C_{11}H_9ClF_3NO$ :  $M+H = 264.0398$ . Found: 264.0402.

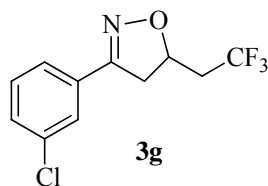

**3-(3-chlorophenyl)-5-(2,2,2-trifluoroethyl)-4,5-dihydroisoxazole 3g:** Solid,  $^1H$  NMR (400 MHz,  $CDCl_3$ )  $\delta$  ppm 7.64 (s, 1H), 7.55 (d,  $J = 7.6$  Hz, 1H), 7.41-7.33 (m, 2H), 5.05-4.97 (m, 1H), 3.57-3.50 (m, 1H), 3.17-3.10 (m, 1H), 2.77-2.66 (m, 1H), 2.49-2.41 (m, 1H).  $^{13}C$  NMR (100 MHz,  $CDCl_3$ )  $\delta$  ppm 125.5, 134.8, 130.7, 130.4, 130.1, 126.7, 125.2 (q,  $J = 275.0$  Hz,  $CF_3$ ), 124.8, 75.1 (d,  $J = 3.0$  Hz), 40.1, 39.0 (q,  $J = 28.0$  Hz,  $CH_2CF_3$ ). IR (neat,  $cm^{-1}$ ): 2921, 1774, 1490, 1383, 1283, 1067.  $^{19}F$  NMR (376 MHz,  $CDCl_3$ ):  $\delta$  -63.83 (s, 3F). IR (neat,  $cm^{-1}$ ): 3439, 2927, 1562, 1431, 1255, 1150, 915, 787. HRMS (ESI) Calcd for  $C_{11}H_9ClF_3NO$ :  $M+H = 264.0398$ . Found: 264.0401.

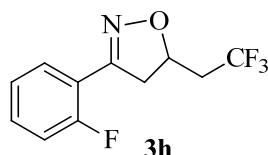

**3-(2-fluorophenyl)-5-(2,2,2-trifluoroethyl)-4,5-dihydroisoxazole 3h:** Solid,  $^1H$  NMR (400 MHz,  $CDCl_3$ )  $\delta$  ppm 7.85 (d,  $J = 7.6$  Hz, 1H), 7.42-7.39 (m, 1H), 7.21-7.10 (m, 2H), 5.03-4.95 (m, 1H), 3.69-3.61 (m, 1H), 3.28-3.72 (m, 1H), 2.75-2.66 (m, 1H), 2.49-2.40 (m, 1H).  $^{13}C$  NMR (100 MHz,  $CDCl_3$ )  $\delta$  ppm 160.3 (d,  $J = 251.0$  Hz), 153.4 (d,  $J = 3.0$  Hz, CF), 132.1 (d,  $J = 9.0$  Hz), 129.0, 125.2 (q,  $J = 275.0$  Hz,  $CF_3$ ), 124.6 (d,  $J = 3.0$  Hz), 117.1 (d,  $J = 9.0$  Hz), 116.4 (d,  $J = 22.0$  Hz), 75.0 (t,  $J = 3.0$  Hz), 42.1 (d,  $J = 7.0$  Hz), 39.2 (q,  $J = 28.0$  Hz,  $CH_2CF_3$ ).  $^{19}F$  NMR (376 MHz,  $CDCl_3$ ):  $\delta$  -63.89 (s, 3F). IR (neat,  $cm^{-1}$ ): 3419, 2924, 1594, 1455, 1254, 1114, 824, 762. HRMS (APCI) Calcd for  $C_{11}H_9F_4NO$ :  $M+H = 248.0693$ . Found: 248.0697.

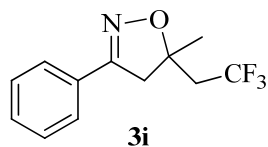

**5-methyl-3-phenyl-5-(2,2,2-trifluoroethyl)-4,5-dihydroisoxazole 3i:** Solid,  $^1H$  NMR (400 MHz,  $CDCl_3$ )  $\delta$  ppm 7.65 (t,  $J = 3.6$  Hz, 2H), 7.40 (d,  $J = 3.6$  Hz, 3H), 3.39 (d,  $J = 16.8$  Hz, 1H), 3.18-3.10 (m, 1H), 2.68-2.57 (m, 2H), 1.57 (s, 3H).  $^{13}C$  NMR (100 MHz,  $CDCl_3$ )  $\delta$  ppm 156.5, 130.2, 128.7, 128.6, 126.5, 125.2 (q,  $J = 276.0$  Hz,  $CF_3$ ), 83.2 (d,  $J = 2.0$  Hz), 45.6, 42.8 (q,  $J = 27.0$  Hz,  $CH_2CF_3$ ), 25.5 (d,  $J = 1.0$  Hz).  $^{19}F$  NMR (376 MHz,  $CDCl_3$ ):  $\delta$  -61.33 (s, 3F). IR (neat,  $cm^{-1}$ ): 3396, 2925, 1597, 1365, 1259, 1157, 918, 759. HRMS (ESI) Calcd for  $C_{12}H_{12}F_3NO$ :  $M+H = 244.0944$ .



Found: 244.0941.

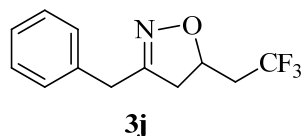

**3-benzyl-5-(2,2,2-trifluoroethyl)-4,5-dihydroisoxazole 3j:** Solid,  $^1\text{H}$  NMR (400 MHz,  $\text{CDCl}_3$ )  $\delta$  ppm 7.35-7.22 (m, 5H), 4.80-4.72 (m, 1H), 3.69 (s, 2H), 3.04-2.98 (m, 1H), 2.63-2.51 (m, 2H), 2.32-2.22 (m, 1H).  $^{13}\text{C}$  NMR (100 MHz,  $\text{CDCl}_3$ )  $\delta$  ppm 158.0, 135.2, 128.9, 128.7, 127.2, 125.2 (q,  $J = 275.0$  Hz,  $\text{CF}_3$ ), 74.0, 41.7, 38.9 (q,  $J = 28.0$  Hz,  $\text{CH}_2\text{CF}_3$ ), 33.9.  $^{19}\text{F}$  NMR (376 MHz,  $\text{CDCl}_3$ ):  $\delta$  -63.98 (s, 3F). IR (neat,  $\text{cm}^{-1}$ ): 3438, 2920, 1388, 1254, 1143, 855, 702. HRMS (ESI) Calcd for  $\text{C}_{12}\text{H}_{12}\text{F}_3\text{NO}$ :  $\text{M}+\text{H} = 244.0944$ . Found: 244.0941.

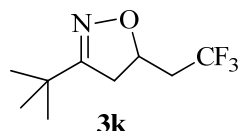

**3-(tert-butyl)-5-(2,2,2-trifluoroethyl)-4,5-dihydroisoxazole 3k:** Solid,  $^1\text{H}$  NMR (400 MHz,  $\text{CDCl}_3$ )  $\delta$  ppm 4.81-4.74 (m, 1H), 3.19-3.12 (m, 1H), 2.79-2.73 (m, 1H), 2.66-2.55 (m, 1H), 2.38-2.27 (m, 1H), 1.22 (s, 9H).  $^{13}\text{C}$  NMR (100 MHz,  $\text{CDCl}_3$ )  $\delta$  ppm 166.1, 125.3 (q,  $J = 275.0$  Hz,  $\text{CF}_3$ ), 74.0 (d,  $J = 3.0$  Hz), 39.74, 38.8 (q,  $J = 27.0$  Hz,  $\text{CH}_2\text{CF}_3$ ), 33.0, 28.0.  $^{19}\text{F}$  NMR (376 MHz,  $\text{CDCl}_3$ ):  $\delta$  -63.86 (s, 3F). IR (neat,  $\text{cm}^{-1}$ ): 3439, 2920, 1624, 1384, 1067, 772, 548. HRMS (ESI) Calcd for  $\text{C}_9\text{H}_{14}\text{F}_3\text{NO}$ :  $\text{M}+\text{H} = 210.1100$ . Found: 210.1096.

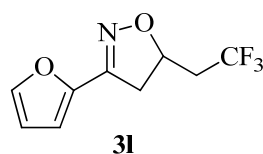

**3-(furan-2-yl)-5-(2,2,2-trifluoroethyl)-4,5-dihydroisoxazole 3l:** Solid,  $^1\text{H}$  NMR (400 MHz,  $\text{CDCl}_3$ )  $\delta$  ppm 7.54 (s, 1H), 6.76 (d,  $J = 3.2$  Hz, 1H), 6.52 (s, 1H), 4.99-4.92 (m, 1H), 3.56-3.50 (m, 1H), 3.17-3.11 (m, 1H), 2.76-2.67 (m, 1H), 2.47-2.39 (m, 1H).  $^{13}\text{C}$  NMR (100 MHz,  $\text{CDCl}_3$ )  $\delta$  ppm 148.8, 144.7, 144.2, 125.1 (q,  $J = 275.0$  Hz,  $\text{CF}_3$ ), 112.3, 111.8, 74.6, 40.3, 38.9 (q,  $J = 28.0$  Hz,  $\text{CH}_2\text{CF}_3$ ).  $^{19}\text{F}$  NMR (376 MHz,  $\text{CDCl}_3$ ):  $\delta$  -63.87 (s, 3F). IR (neat,  $\text{cm}^{-1}$ ): 3389, 2923, 1695, 1384, 1252, 1043, 763, 586. HRMS (APCI) Calcd for  $\text{C}_9\text{H}_8\text{F}_3\text{NO}_2$ :  $\text{M}+\text{H} = 220.0580$ . Found: 220.0586.

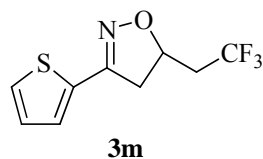

**3-(thiophen-2-yl)-5-(2,2,2-trifluoroethyl)-4,5-dihydroisoxazole 3m:** Solid,  $^1\text{H}$

NMR (400 MHz, CDCl<sub>3</sub>)  $\delta$  ppm 7.42 (d,  $J$  = 4.8 Hz, 1H), 7.22 (d,  $J$  = 3.2 Hz, 1H), 7.09-7.06 (m, 1H), 5.01-4.94 (m, 1H), 3.60-3.53 (m, 1H), 3.20-3.14 (m, 1H), 2.76-2.68 (m, 1H), 2.48-2.40 (m, 1H). <sup>13</sup>C NMR (100 MHz, CDCl<sub>3</sub>)  $\delta$  ppm 152.3, 131.3, 128.8, 128.7, 127.3, 125.2 (q,  $J$  = 275.0 Hz, CF<sub>3</sub>), 75.0 (d,  $J$  = 3.0 Hz), 41.2, 38.9 (q,  $J$  = 28.0 Hz, CH<sub>2</sub>CF<sub>3</sub>). <sup>19</sup>F NMR (376 MHz, CDCl<sub>3</sub>):  $\delta$  -63.83 (s, 3F). IR (neat, cm<sup>-1</sup>): 3438, 2921, 2361, 1434, 1258, 1121, 810, 719. HRMS (ESI) Calcd for C<sub>9</sub>H<sub>8</sub>F<sub>3</sub>NOS: M+H = 236.0351. Found: 236.0355.

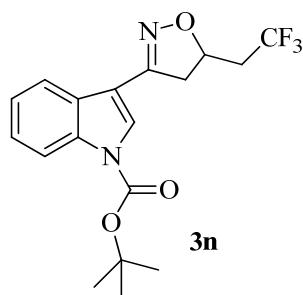

**tert-butyl-3-(5-(2,2,2-trifluoroethyl)-4,5-dihydroisoxazol-3-yl)-1H-indole-1-carboxylate 3n:** Solid, <sup>1</sup>H NMR (400 MHz, CDCl<sub>3</sub>)  $\delta$  ppm 8.22 (d,  $J$  = 7.6 Hz, 1H), 8.14 (d,  $J$  = 8.0 Hz, 1H), 7.73 (s, 1H), 7.43-7.33 (m, 1H), 7.27 (s, 1H), 5.00-4.92 (m, 1H), 3.62-3.56 (m, 1H), 3.23-3.17 (m, 1H), 2.81-2.69 (m, 1H), 2.53-2.39 (m, 1H), 1.71 (s, 9H). <sup>13</sup>C NMR (100 MHz, CDCl<sub>3</sub>)  $\delta$  ppm 152.2, 149.3, 135.8, 127.0, 126.9, 125.7, 125.4 (q,  $J$  = 275.0 Hz, CF<sub>3</sub>), 123.9, 123.0, 115.1, 111.3, 84.9, 73.7, 41.4, 39.1 (q,  $J$  = 28.0 Hz, CH<sub>2</sub>CF<sub>3</sub>), 28.2. <sup>19</sup>F NMR (376 MHz, CDCl<sub>3</sub>):  $\delta$  -63.81 (s, 3F). IR (neat, cm<sup>-1</sup>): 3428, 2980, 1736, 1627, 1371, 1251, 1155, 891, 754. HRMS (APCI) Calcd for C<sub>18</sub>H<sub>19</sub>F<sub>3</sub>N<sub>2</sub>O<sub>3</sub>: M+H = 369.1421. Found: 369.1426.

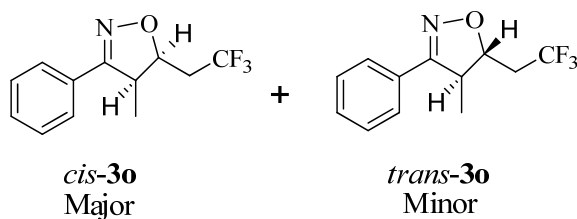

**4-methyl-3-phenyl-5-(2,2,2-trifluoroethyl)-4,5-dihydroisoxazole 3o:** Solid, d.r.(*cis:trans*) = 3.3:1, <sup>1</sup>H NMR (400 MHz, CDCl<sub>3</sub>)  $\delta$  ppm 7.73-7.67 (m, 2.8H), 7.44-7.42 (m, 4.2 H), 4.76-4.74 (m, 0.3H), 4.64-4.60 (m, 1.0H), 3.65-3.62 (m, 0.3H), 3.58-3.52 (m, 1.0H), 2.65-2.55 (m, 1.6H), 2.41-2.33 (m, 1.0H), 1.37 (s, 3.1H), 1.35 (s, 0.9H). <sup>13</sup>C NMR (100 MHz, CDCl<sub>3</sub>)  $\delta$  ppm 162.9, 160.4, 130.4, 130.3, 128.9, 128.9, 128.3, 128.1, 127.0, 127.0, 125.6 (q,  $J$  = 275.0 Hz, CF<sub>3</sub>), 125.4 (q,  $J$  = 275.0 Hz, CF<sub>3</sub>), 81.8 (d,  $J$  = 3.0Hz), 78.0 (d,  $J$  = 3.0Hz), 47.7, 43.7, 38.5 (q,  $J$  = 27.0 Hz, CH<sub>2</sub>CF<sub>3</sub>), 32.9 (q,  $J$  = 29.0 Hz, CH<sub>2</sub>CF<sub>3</sub>), 17.5, 11.7. <sup>19</sup>F NMR (376 MHz, CDCl<sub>3</sub>):  $\delta$  -63.31 (s, 3F),  $\delta$  -64.34 (s, 3F). IR (neat, cm<sup>-1</sup>): 3394, 2924, 1651, 1384, 1255, 1077, 769, 699. HRMS (ESI) Calcd for C<sub>12</sub>H<sub>12</sub>F<sub>3</sub>NO: M+H = 244.0944. Found: 244.0940.

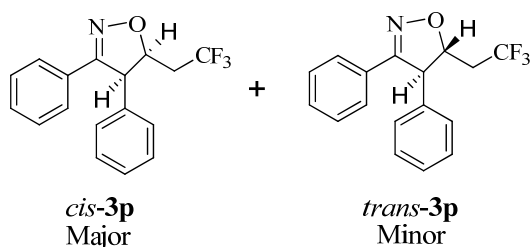

**3,4-diphenyl-5-(2,2,2-trifluoroethyl)-4,5-dihydroisoxazole 3p:** Solid, d.r.(*cis:trans*) = 3.4:1,  $^1\text{H}$  NMR (400 MHz,  $\text{CDCl}_3$ )  $\delta$  ppm 7.61-7.59 (m, 2.6H), 7.37-7.16 (m, 10.3H), 5.02-4.99 (m, 0.3H), 4.83-4.79 (m, 1.0H), 4.67-4.65 (m, 0.3H), 4.56-4.55 (m, 1.0H), 2.73-2.56 (m, 1.0H), 2.54-2.48 (m, 1.0H), 2.28-2.24 (m, 0.3H), 2.22-2.12 (m, 0.3H).  $^{13}\text{C}$  NMR (100 MHz,  $\text{CDCl}_3$ )  $\delta$  ppm 160.7, 158.0, 137.7, 132.9, 130.2, 130.2, 129.4, 129.4, 129.2, 128.7, 128.5, 128.2, 128.1, 127.4, 127.3, 127.3, 127.2, 127.1, 125.6 (q,  $J = 275.0$  Hz,  $\text{CF}_3$ ), 125.3 (q,  $J = 275.0$  Hz,  $\text{CF}_3$ ), 83.6 (d,  $J = 3.0$  Hz), 79.1 (d,  $J = 3.0$  Hz), 59.7, 56.8, 38.8 (q,  $J = 27.0$  Hz,  $\text{CH}_2\text{CF}_3$ ), 34.0 (q,  $J = 29.0$  Hz,  $\text{CH}_2\text{CF}_3$ ).  $^{19}\text{F}$  NMR (376 MHz,  $\text{CDCl}_3$ ):  $\delta$  -62.88 (s, 3F),  $\delta$  -64.23 (s, 3F). IR (neat,  $\text{cm}^{-1}$ ): 3435, 2922, 1597, 1385, 1255, 1126, 770, 696. HRMS (ESI) Calcd for  $\text{C}_{17}\text{H}_{14}\text{F}_3\text{NO}$ :  $M+H = 306.1100$ . Found: 306.1097.

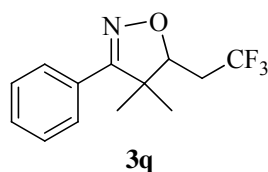

**4,4-dimethyl-3-phenyl-5-(2,2,2-trifluoroethyl)-4,5-dihydroisoxazole 3q:** Solid,  $^1\text{H}$  NMR (400 MHz,  $\text{CDCl}_3$ )  $\delta$  ppm 7.65-7.62 (m, 2H), 7.44-7.39 (m, 3H), 4.41-4.38 (m, 1H), 2.63-2.55 (m, 1H), 2.45-2.37 (m, 1H), 1.41 (s, 3H), 1.25 (s, 3H).  $^{13}\text{C}$  NMR (100 MHz,  $\text{CDCl}_3$ )  $\delta$  ppm 164.9, 130.0, 128.8, 128.7, 127.4, 125.9 (q,  $J = 275.0$  Hz,  $\text{CF}_3$ ), 83.9 (d,  $J = 3.0$  Hz), 51.5, 33.2 (q,  $J = 29.0$  Hz,  $\text{CH}_2\text{CF}_3$ ), 23.3, 19.5.  $^{19}\text{F}$  NMR (376 MHz,  $\text{CDCl}_3$ ):  $\delta$  -63.72 (s, 3F). IR (neat,  $\text{cm}^{-1}$ ): 3395, 2923, 1654, 1403, 1257, 1120, 903, 694. HRMS (ESI) Calcd for  $\text{C}_{13}\text{H}_{14}\text{F}_3\text{NO}$ :  $M+H = 258.1100$ . Found: 258.1103.

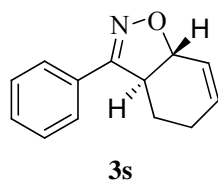

**3-phenyl-3a,4,5,7a-tetrahydrobenzo[d]isoxazole 3s:** Solid,  $^1\text{H}$  NMR (400 MHz,  $\text{CDCl}_3$ )  $\delta$  ppm 7.73-7.71 (m, 2H), 7.42-7.41 (m, 3H), 6.20-6.17 (m, 1H), 6.05-6.03 (m, 1H), 4.84-4.82 (m, 1H), 3.54-3.48 (m, 1H), 2.14-2.09 (m, 1H), 2.03-1.97 (m, 2H), 1.58-1.51 (m, 1H).  $^{13}\text{C}$  NMR (100 MHz,  $\text{CDCl}_3$ )  $\delta$  ppm 161.1, 133.1, 129.9, 129.2, 128.8, 126.9, 122.4, 76.7, 44.1, 23.0, 22.4. HRMS (ESI) Calcd for  $\text{C}_{13}\text{H}_{13}\text{NO}$ :  $M+H = 200.1070$ . Found: 200.1067.

## 7. References:

- [1] J. H. Dam, P. Fristrup and R. Madsen, *J. Org. Chem.*, 2008, **73**, 3228.
- [2] D. Jiang, J. Peng and Y. Chen, *Org. Lett.*, 2008, **10**, 1695.
- [3] M.-K. Zhu, J.-F. Zhao and T.-P. Loh, *J. Am. Chem. Soc.* 2010, **132**, 6284.
- [4] F. Mieke, C. Meyer and J. Cossy, *Angew. Chem. Int. Ed.*, 2011, **123**, 6054.
- [5] H. M. Barentsen, A. B. Sieval and J. Corenelisse, *Tetrahedron*, 1995, **51**, 7495.
- [6] X.-H. Tan, C.-Z. Tao, Y.-Q. Hou, L. Luo, L. Liu and Q.-X. Guo, *Chinese J. Chem.*, 2005, **23**, 237.

## 8. Crystallographic data of 3a

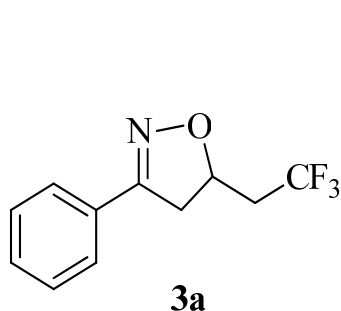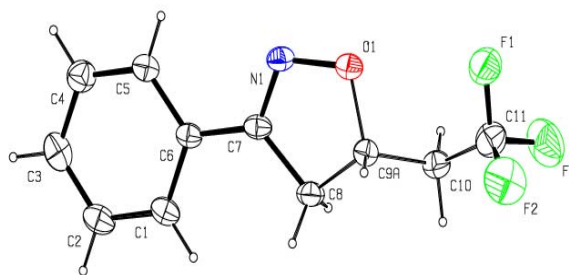

**structure of 3a**

### Datablock:

|                                     |                                                  |                                 |
|-------------------------------------|--------------------------------------------------|---------------------------------|
| Bond precision:                     | C-C = 0.0099 Å                                   | Wavelength=0.71073              |
| Cell:                               | a=8.6562 (9)    b=19.9373 (18)    c=12.6769 (15) |                                 |
|                                     | alpha=90    beta=102.331 (12)    gamma=90        |                                 |
| Temperature:                        | 293 K                                            |                                 |
|                                     | Calculated                                       | Reported                        |
| Volume                              | 2137.3 (4)                                       | 2137.3 (4)                      |
| Space group                         | P 21/a                                           | P 1 21/a 1                      |
| Hall group                          | -P 2yab                                          | -P 2yab                         |
| Moiety formula                      | C11 H10 F3 N O                                   | C11 H10 F3 N O                  |
| Sum formula                         | C11 H10 F3 N O                                   | C11 H10 F3 N O                  |
| Mr                                  | 229.20                                           | 229.20                          |
| Dx, g cm <sup>-3</sup>              | 1.425                                            | 1.425                           |
| Z                                   | 8                                                | 8                               |
| Mu (mm <sup>-1</sup> )              | 0.127                                            | 0.127                           |
| F000                                | 944.0                                            | 944.0                           |
| F000'                               | 944.70                                           |                                 |
| h, k, l <sub>max</sub>              | 10, 24, 15                                       | 10, 24, 15                      |
| Nref                                | 4077                                             | 4070                            |
| T <sub>min</sub> , T <sub>max</sub> | 0.967, 0.974                                     |                                 |
| T <sub>min</sub> '                  | 0.965                                            |                                 |
| Correction method=                  | Not given                                        |                                 |
| Data completeness=                  | 0.998                                            | Theta(max)= 25.680              |
| R(reflections)=                     | 0.1012( 1376)                                    | wR2(reflections)= 0.3854( 4070) |
| S =                                 | 1.029                                            | Npar= 325                       |

## 9. $^1\text{H}$ NMR and $^{13}\text{C}$ NMR spectra for substrates 1d, 1g, 1h, 1l, 1m

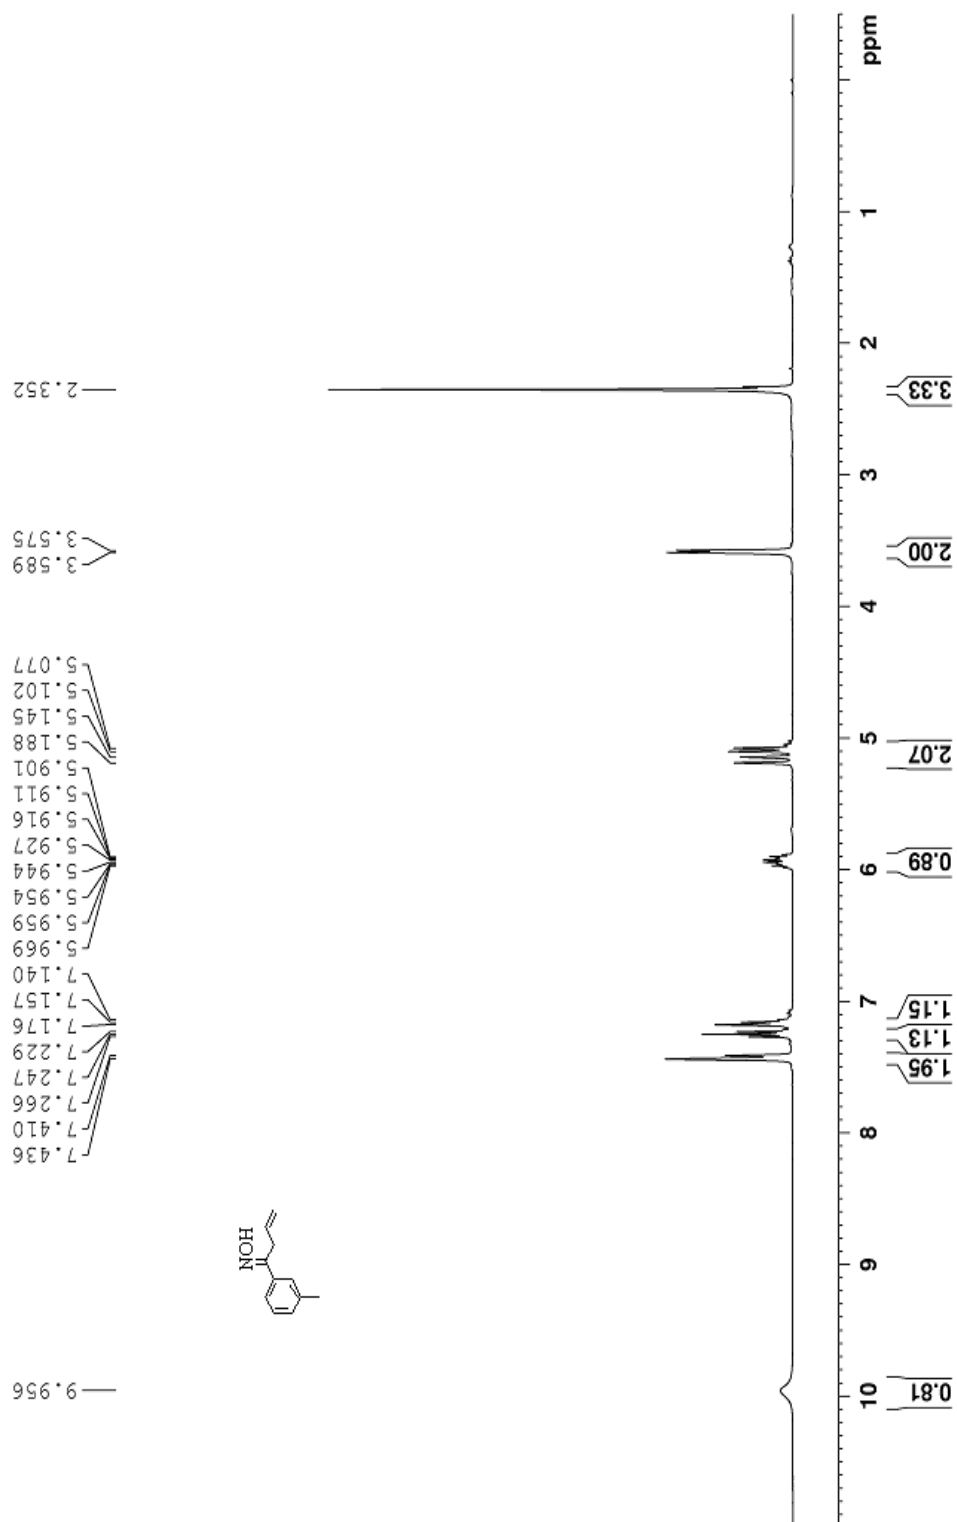

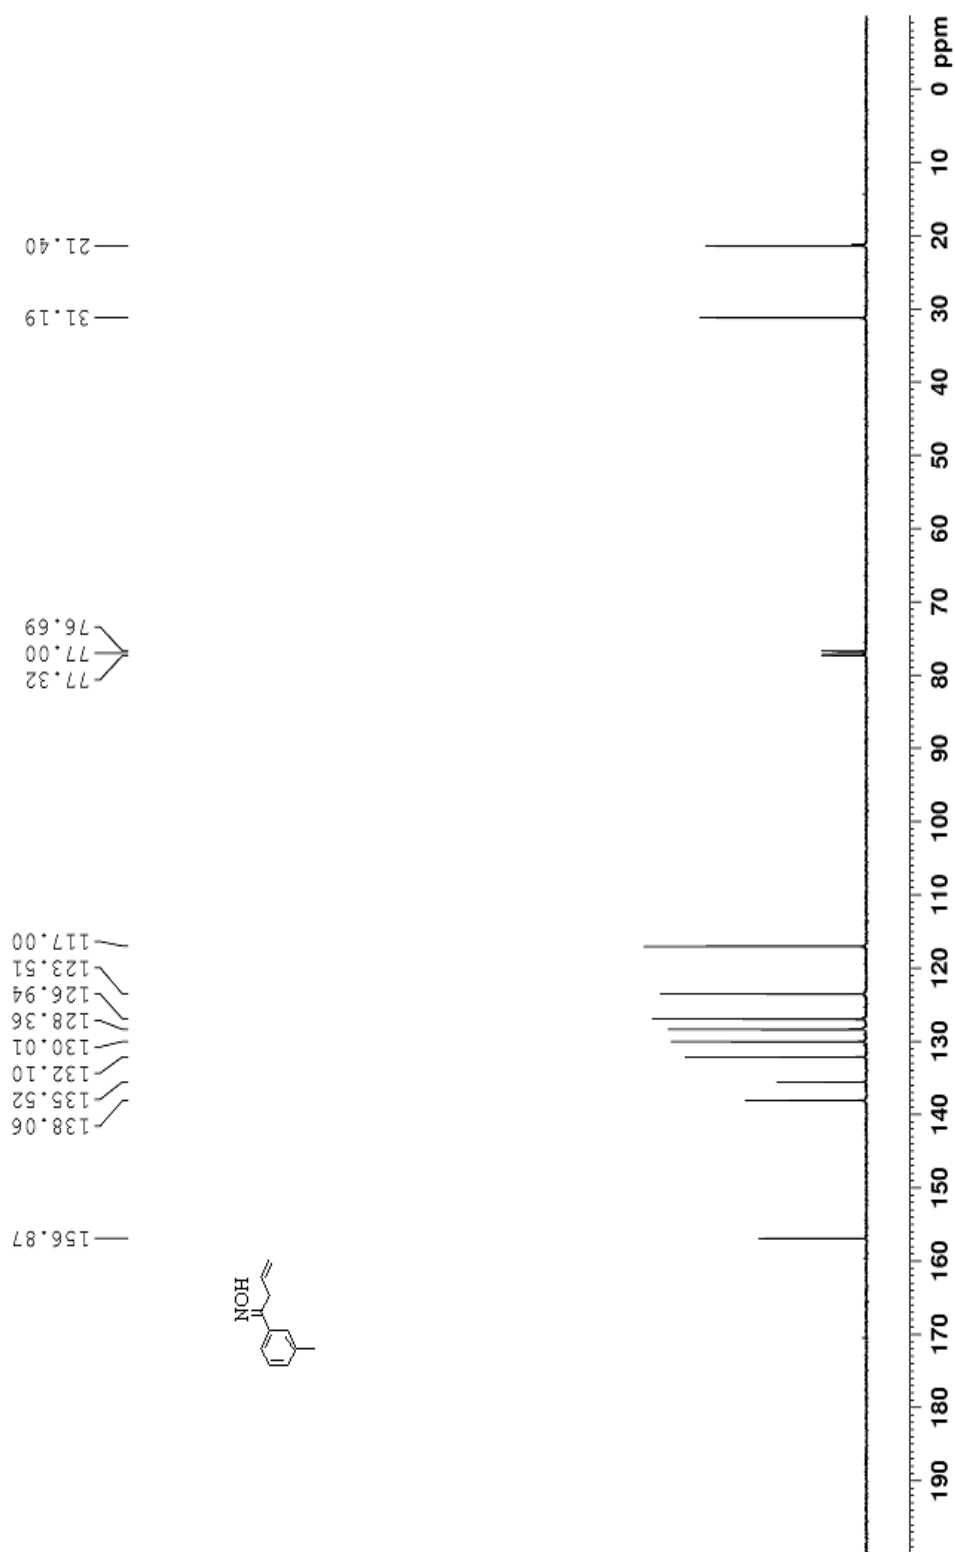

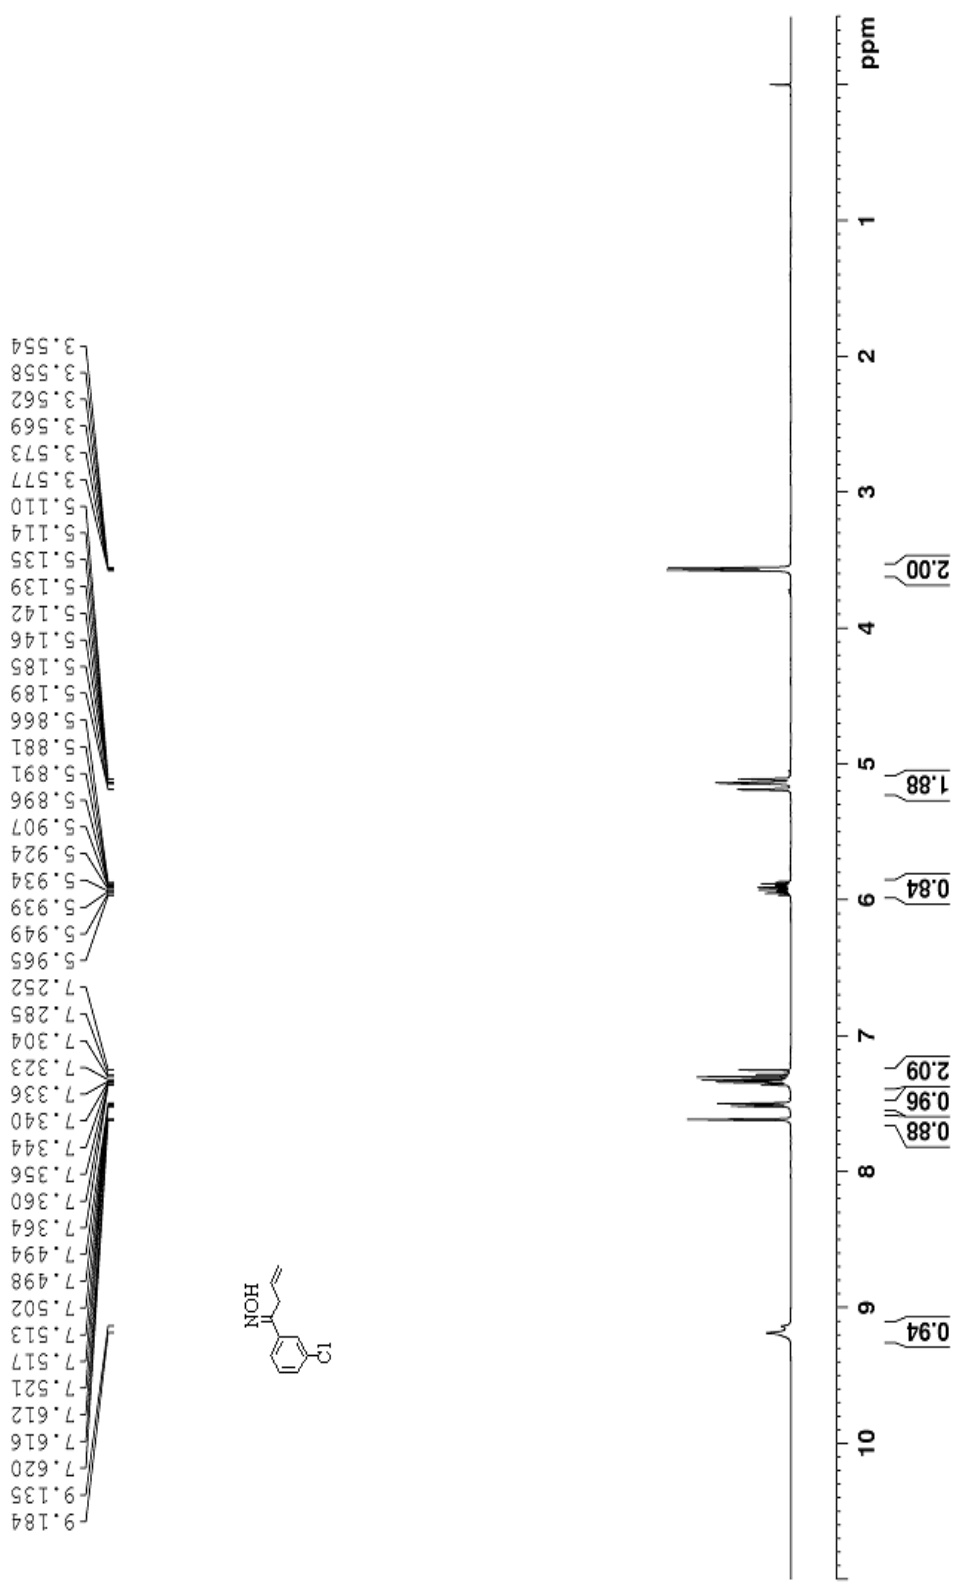



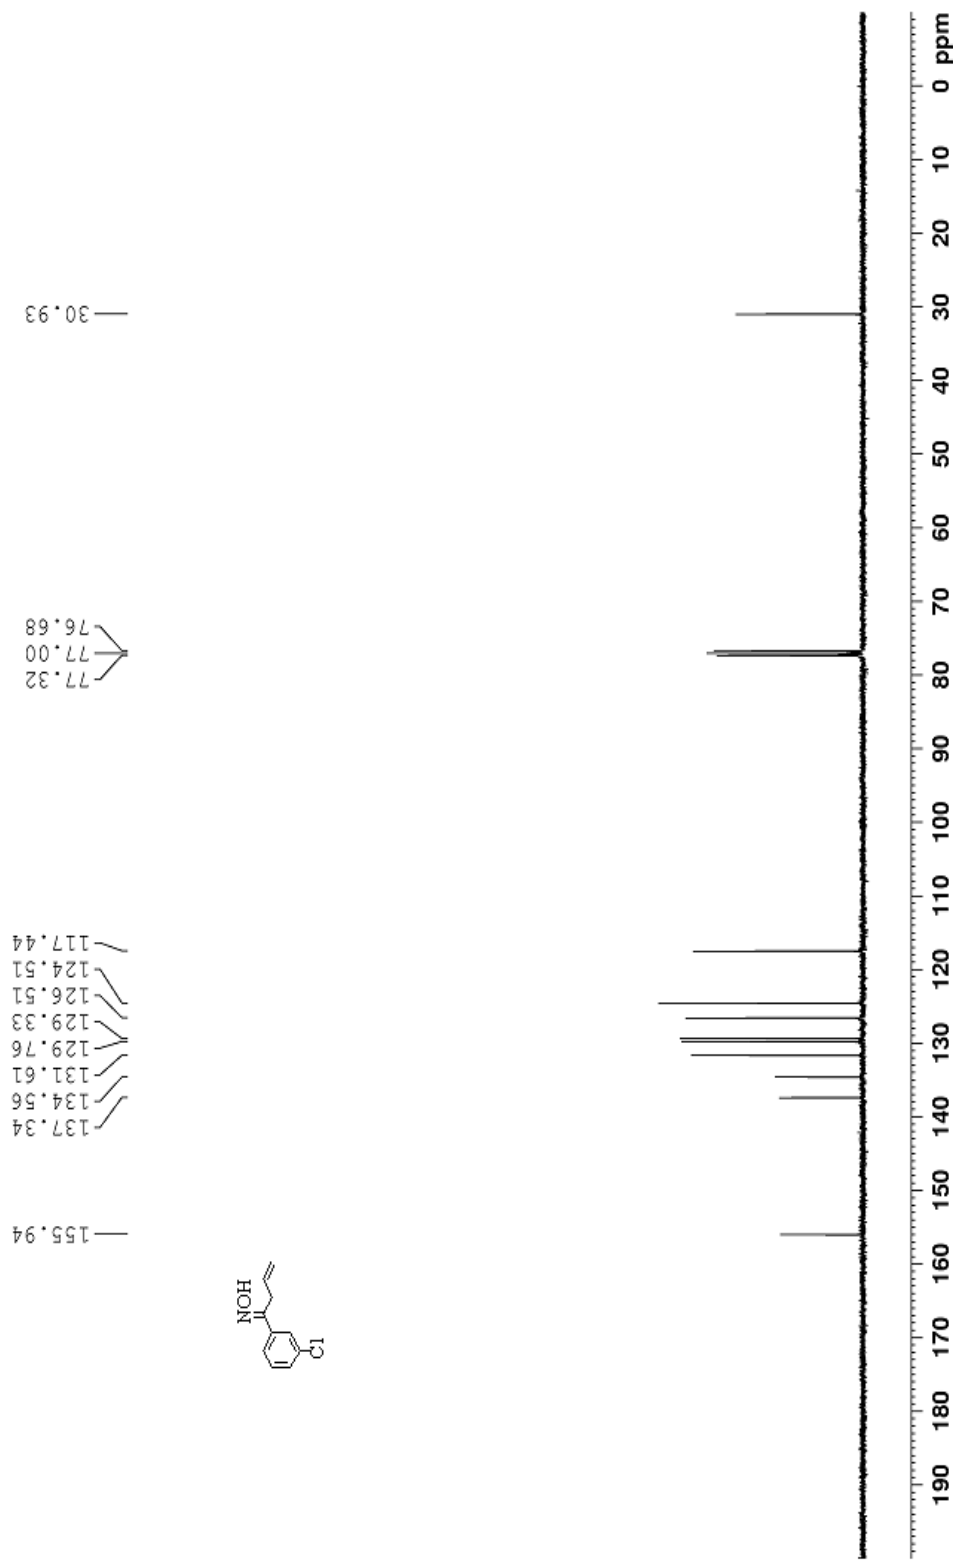

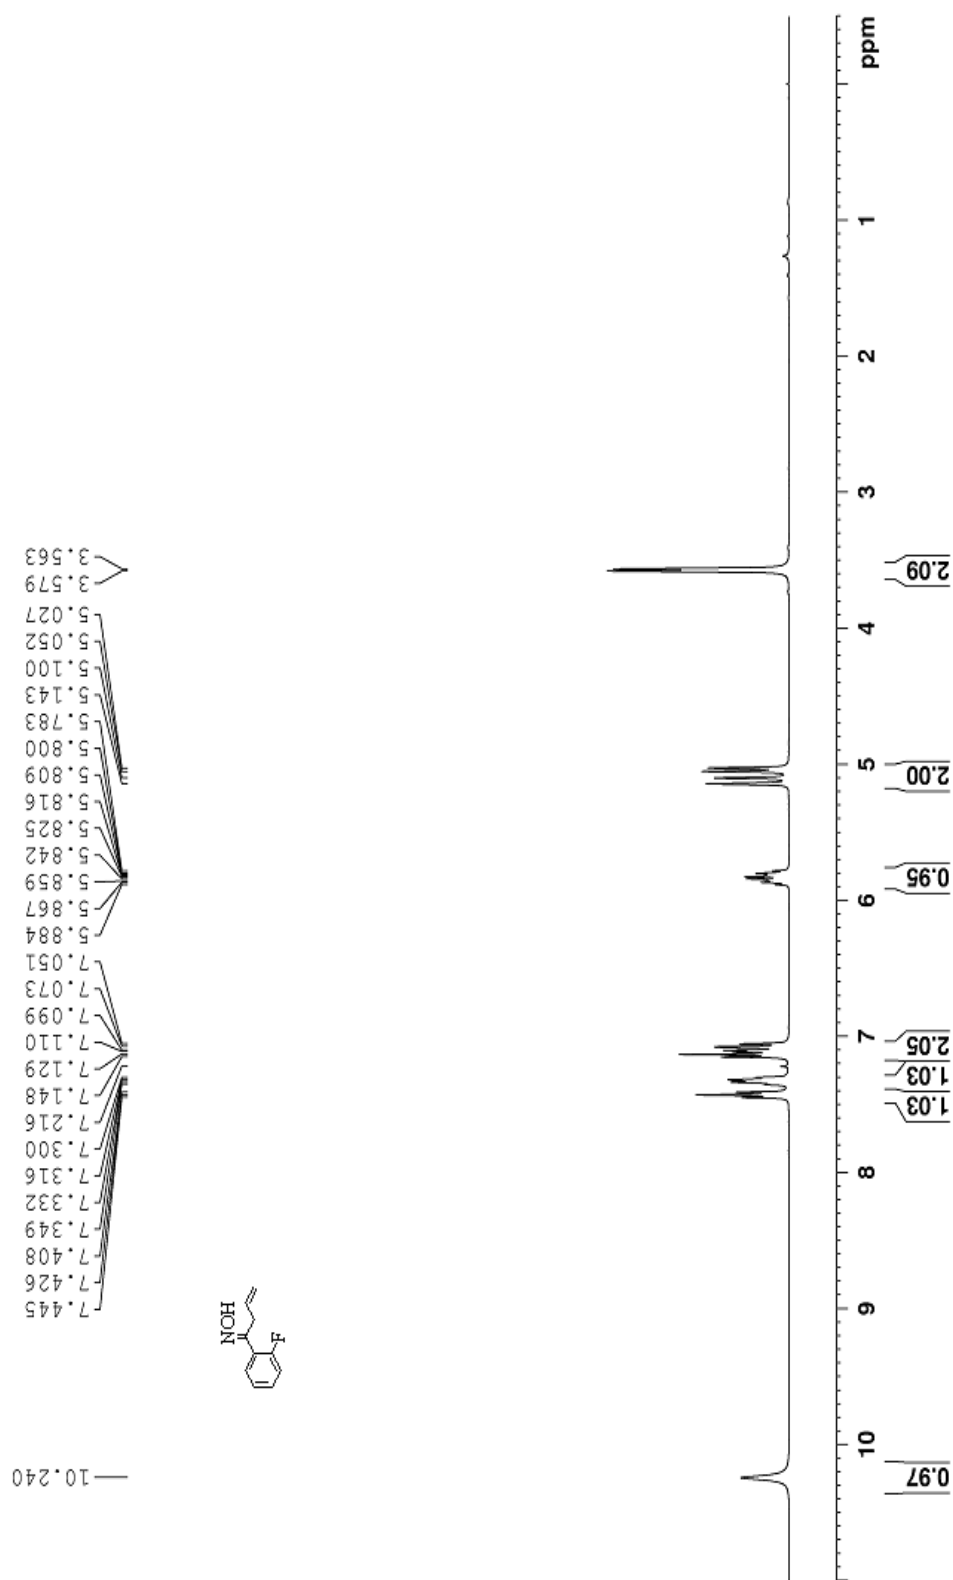

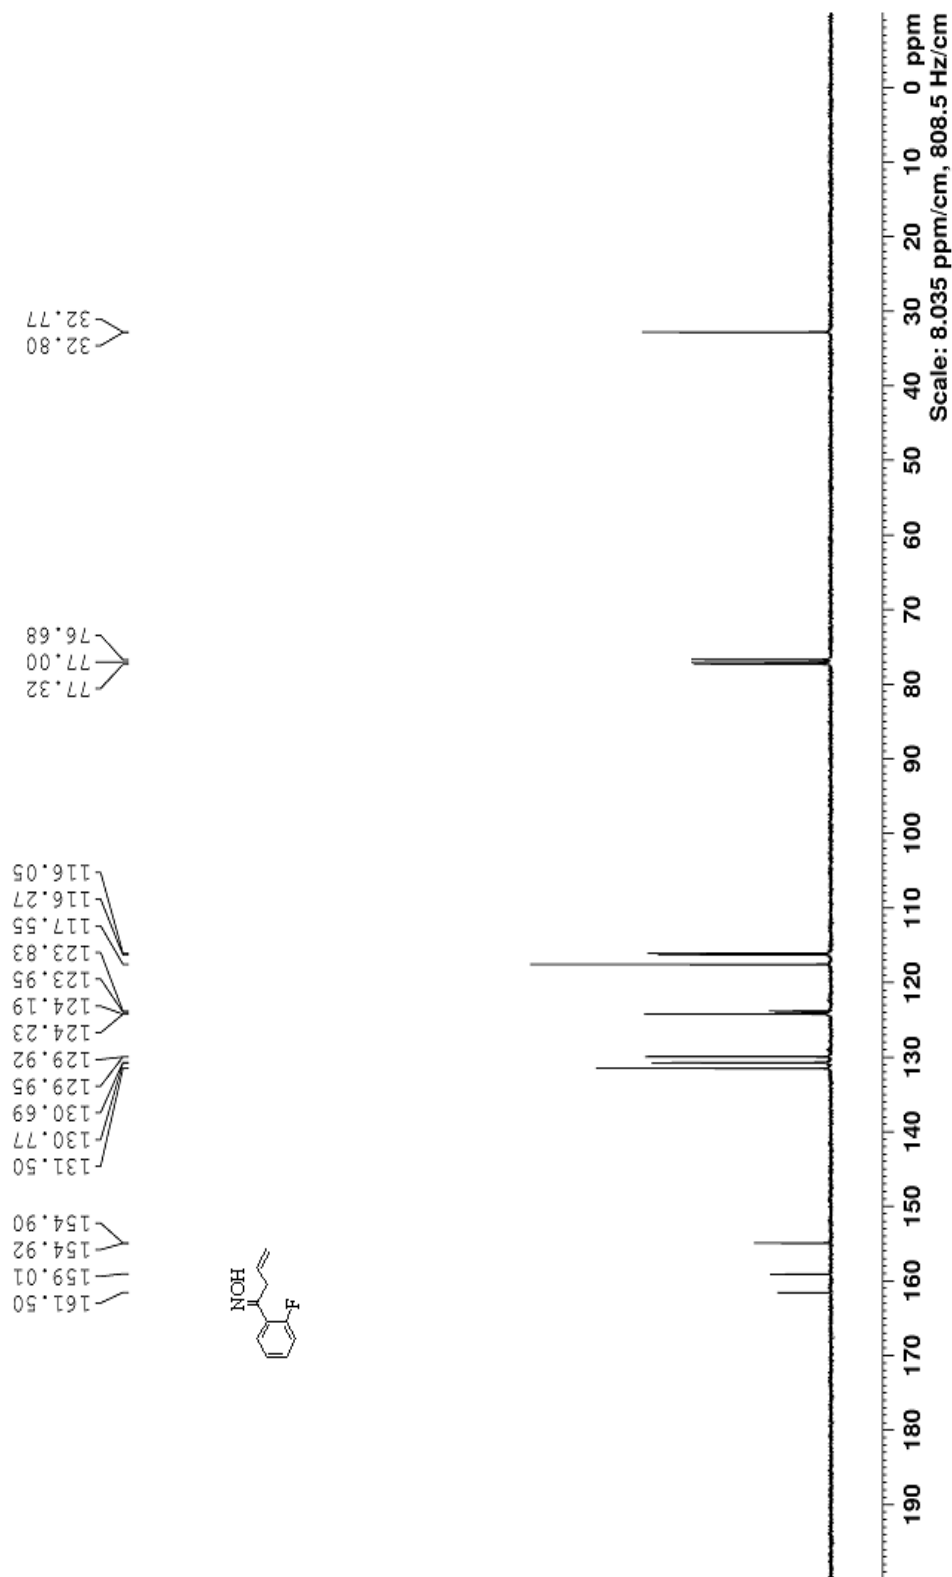

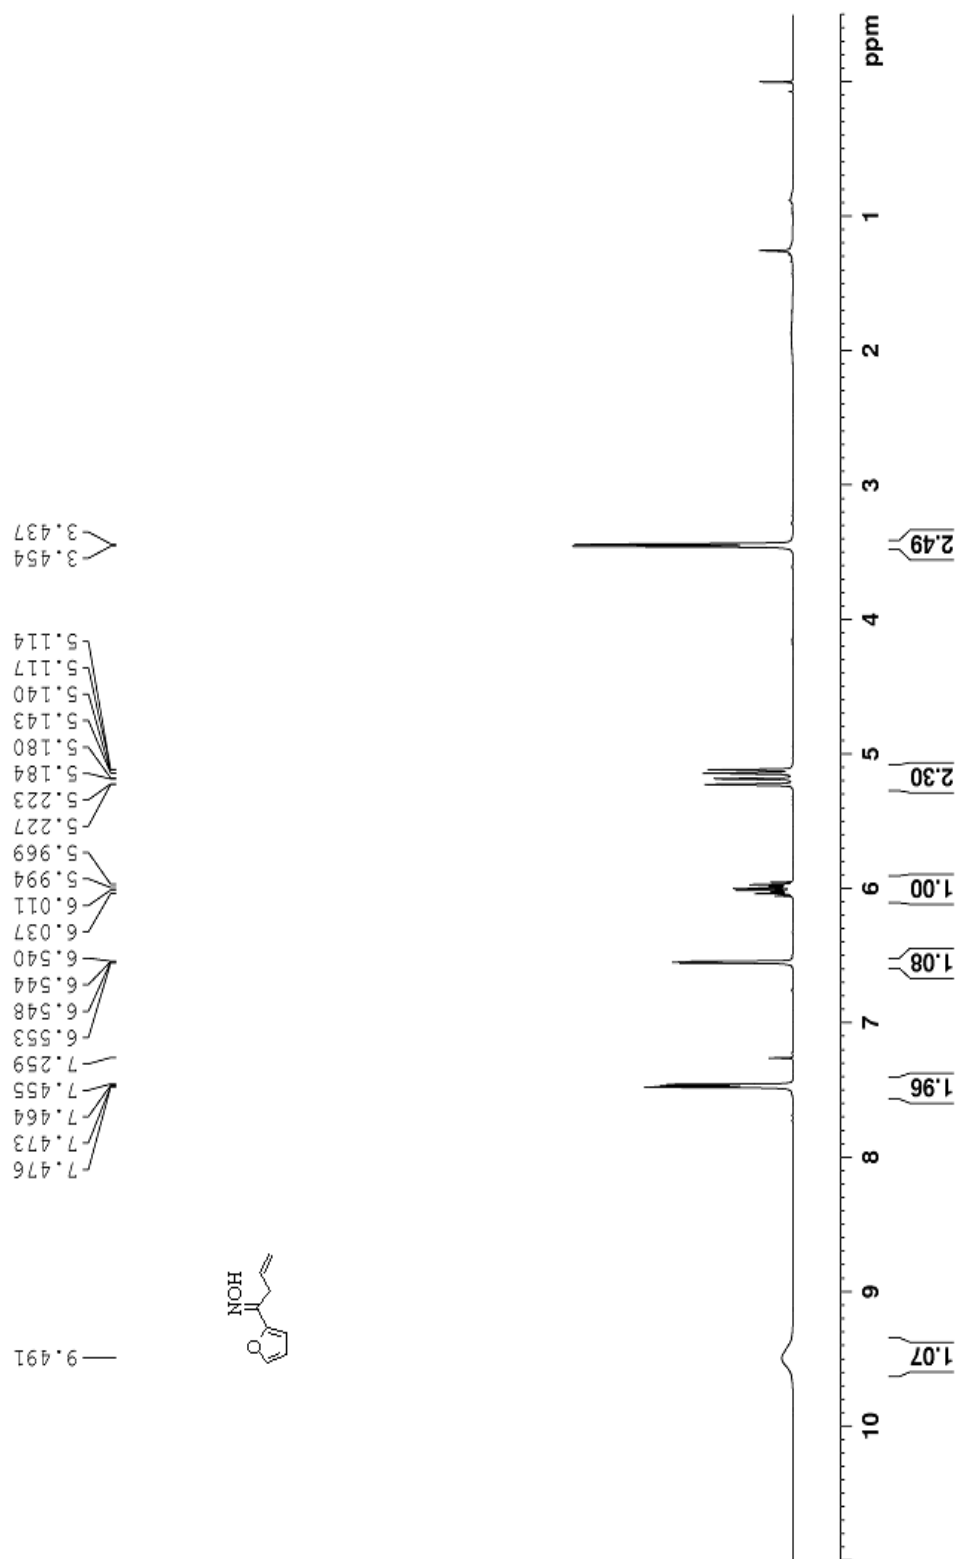

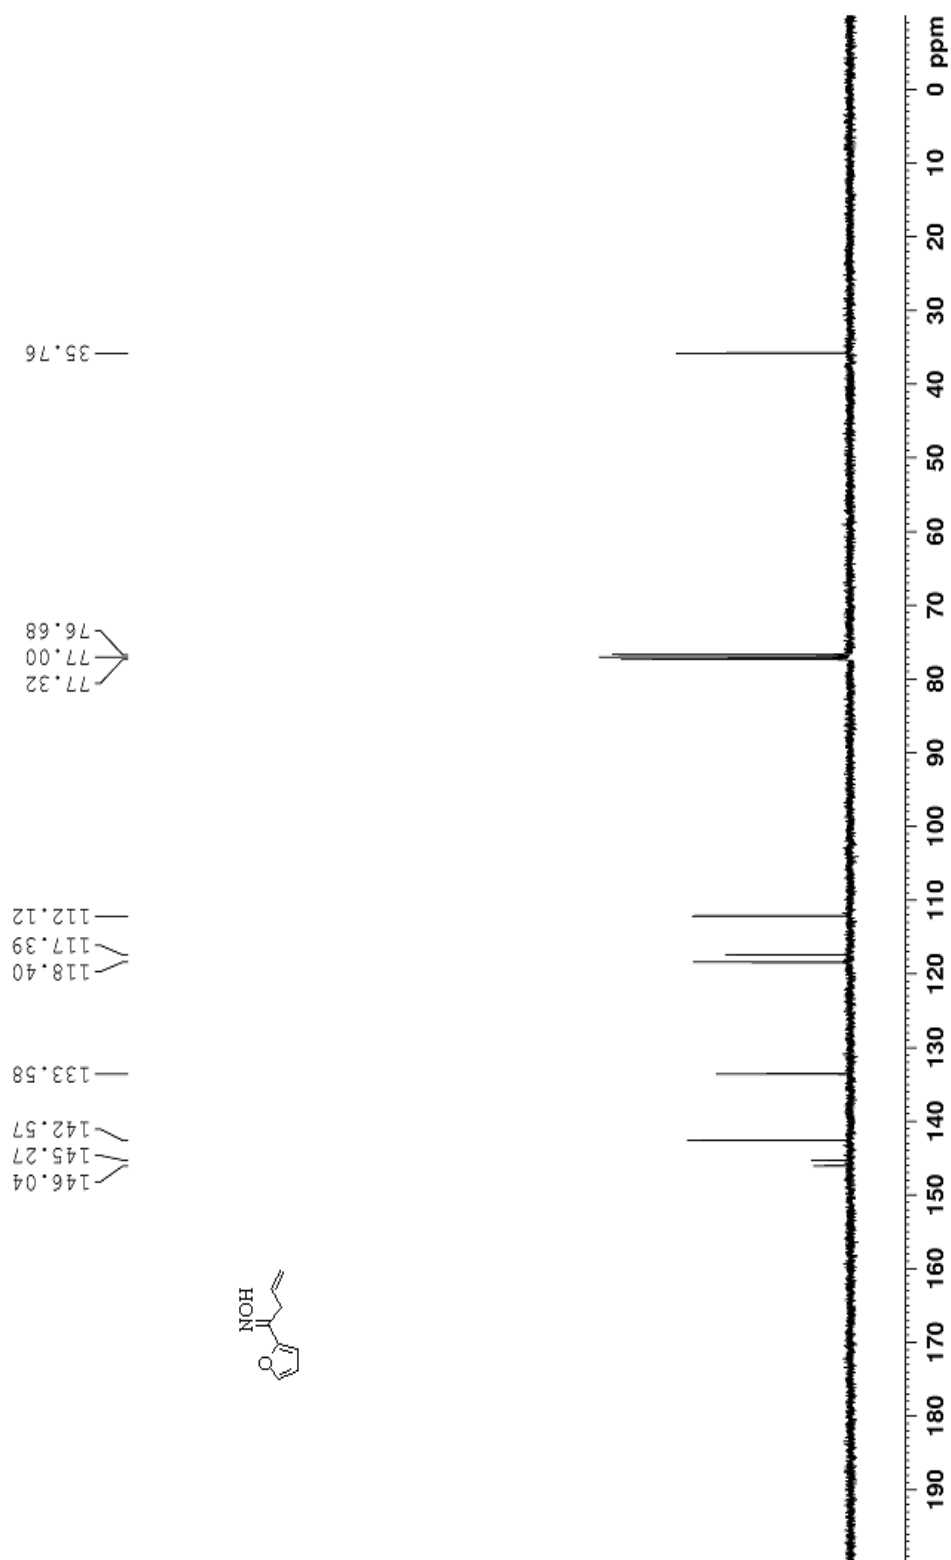

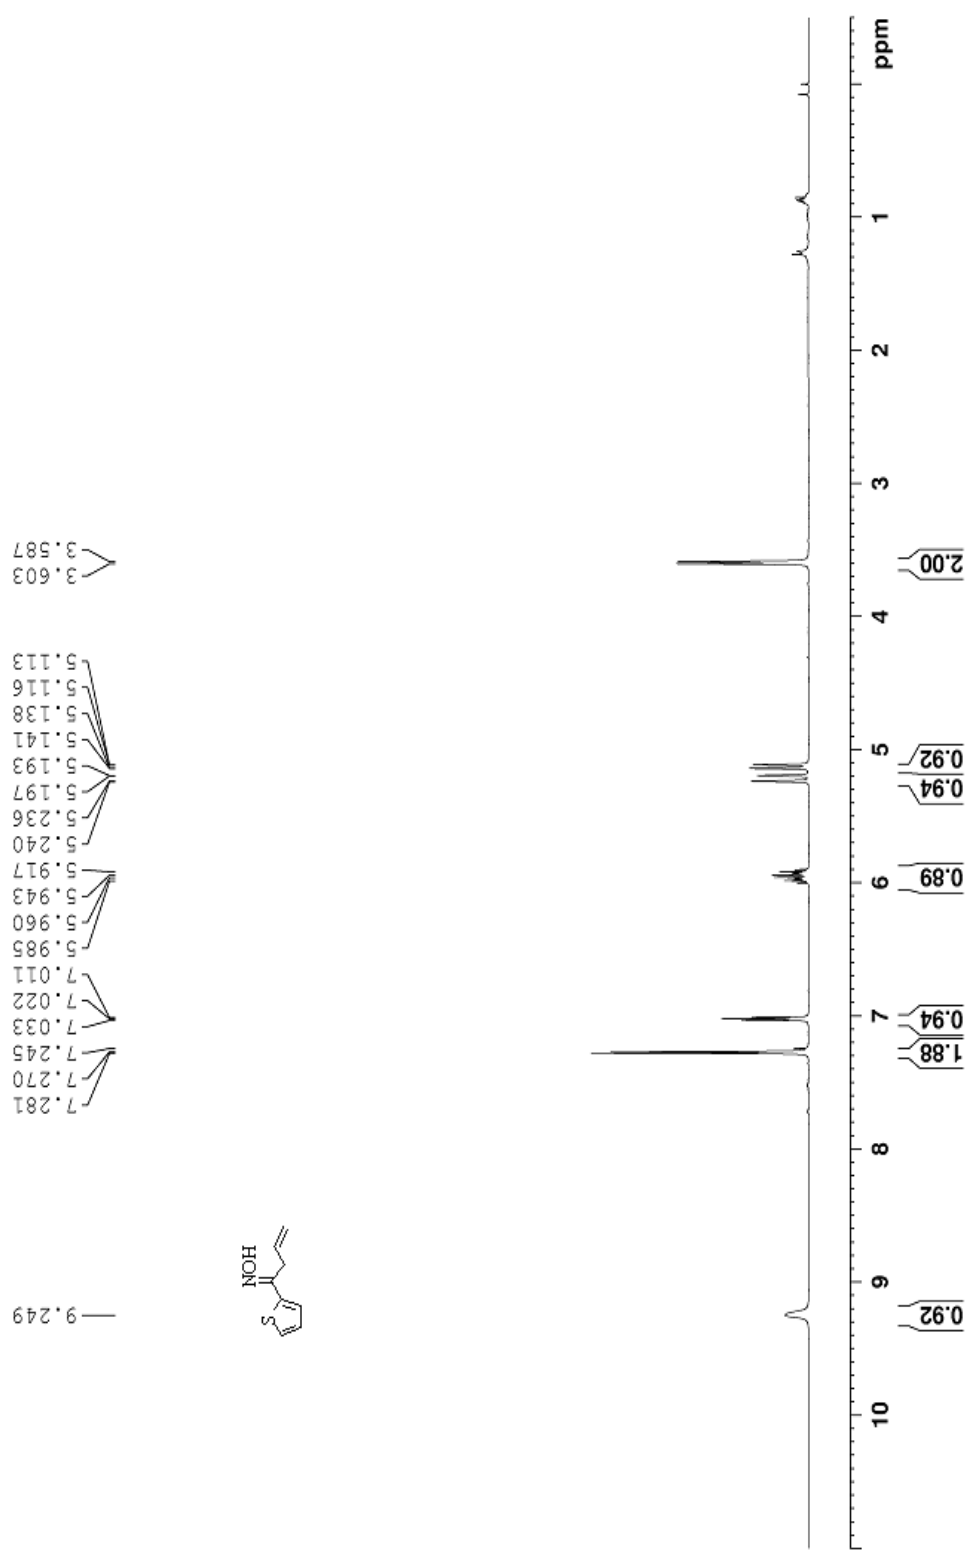

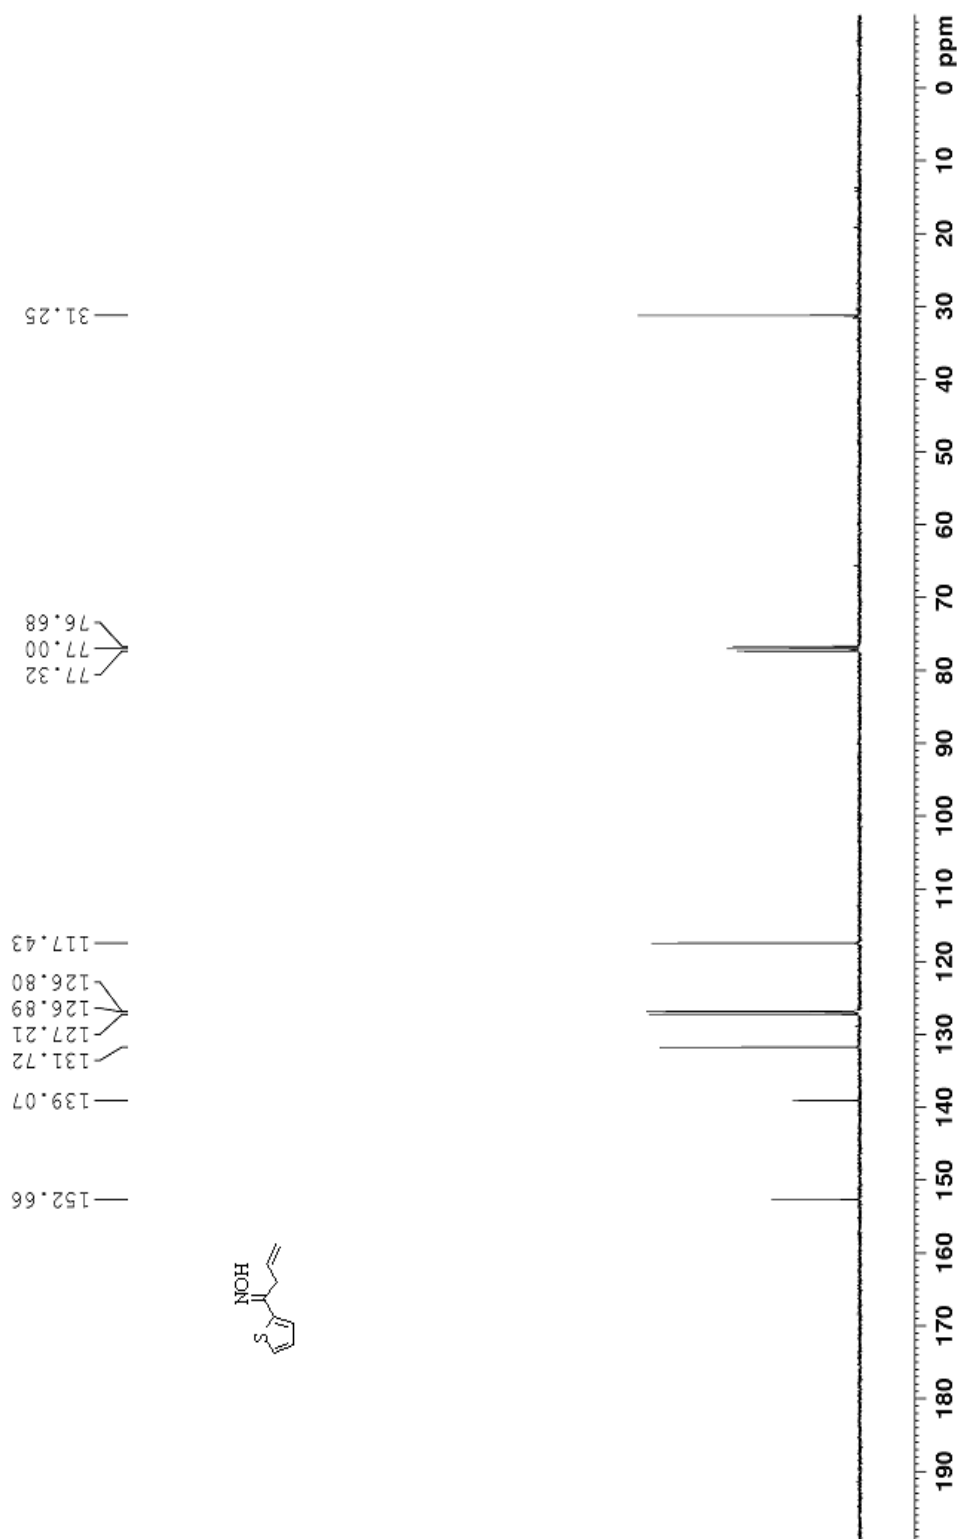

# 10. $^1\text{H}$ NMR, $^{13}\text{C}$ NMR, $^{19}\text{F}$ NMR spectra and 1D-NOESY for products 3a-3q, and 3s

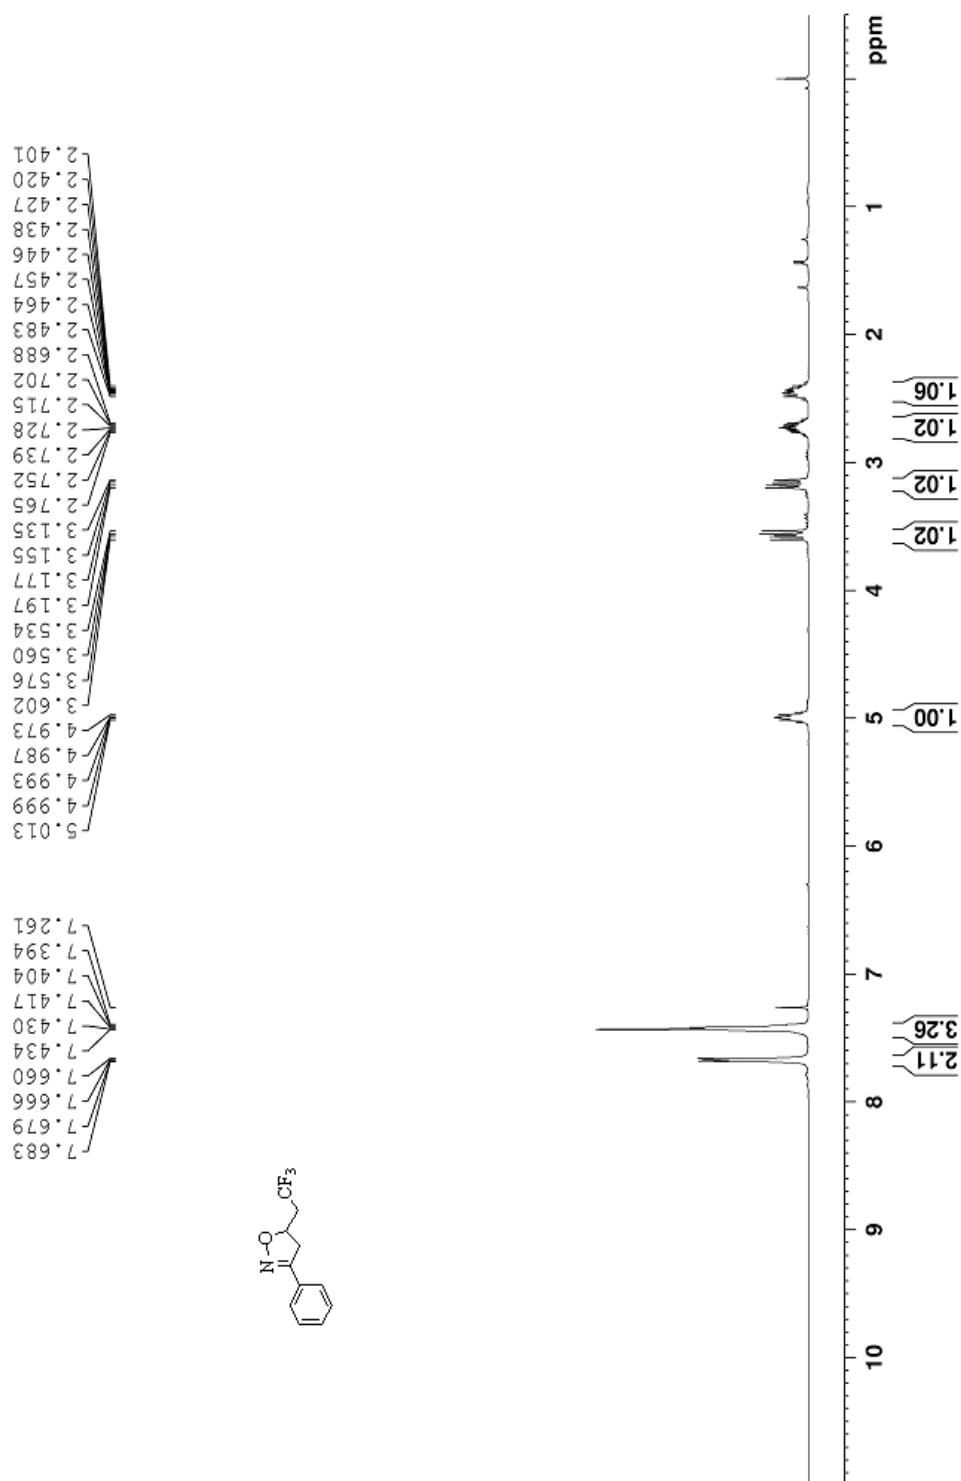



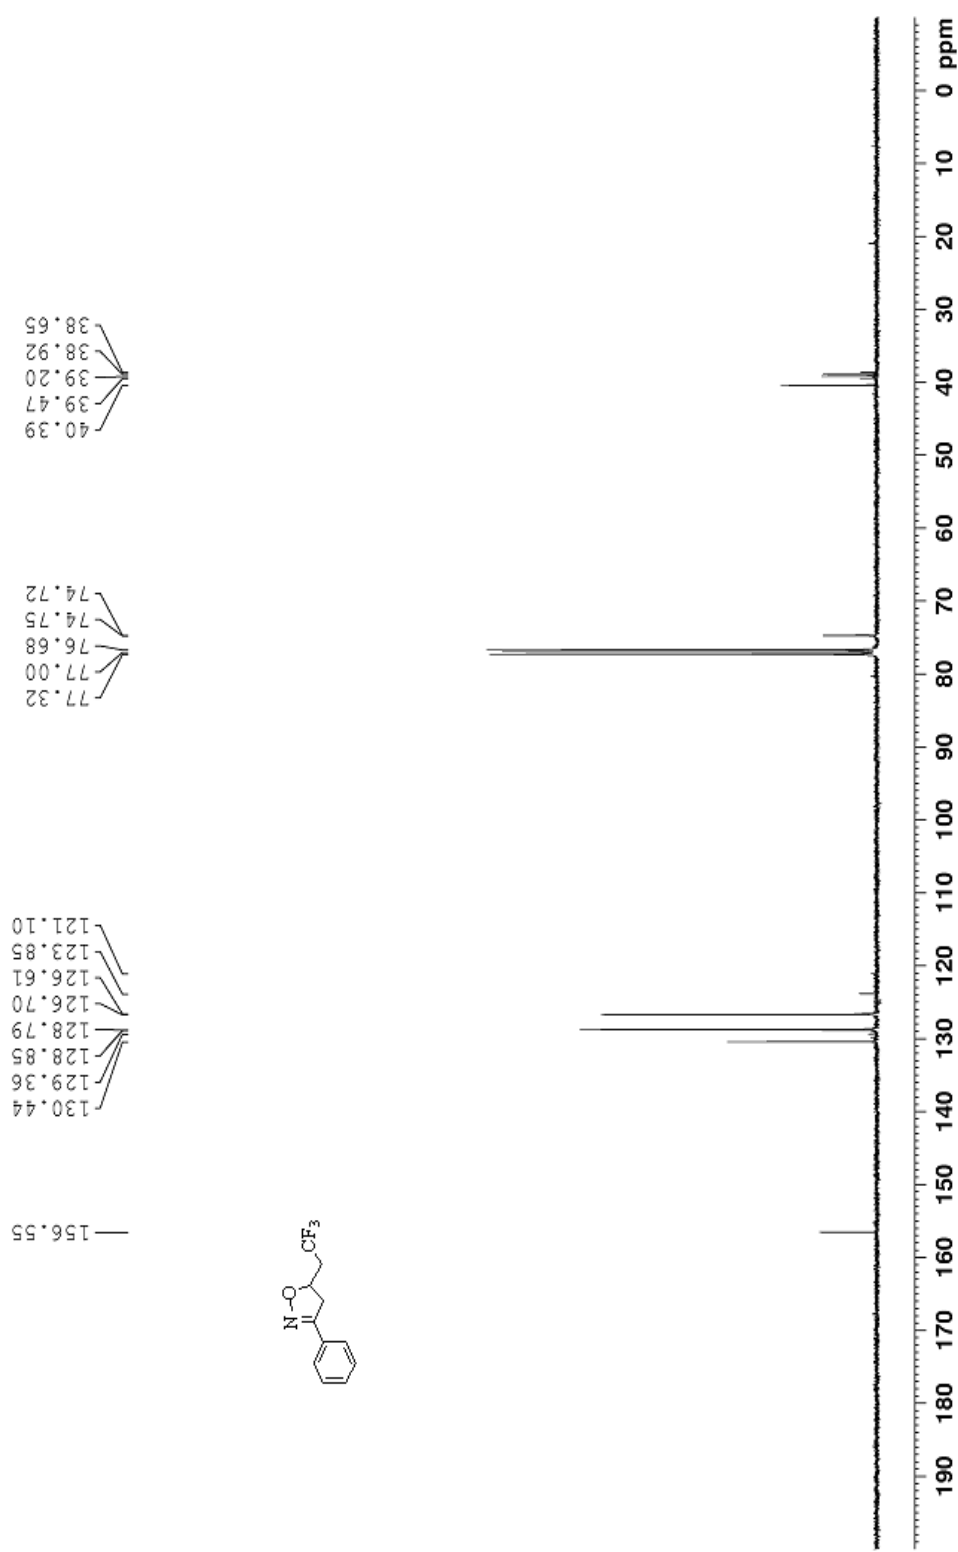

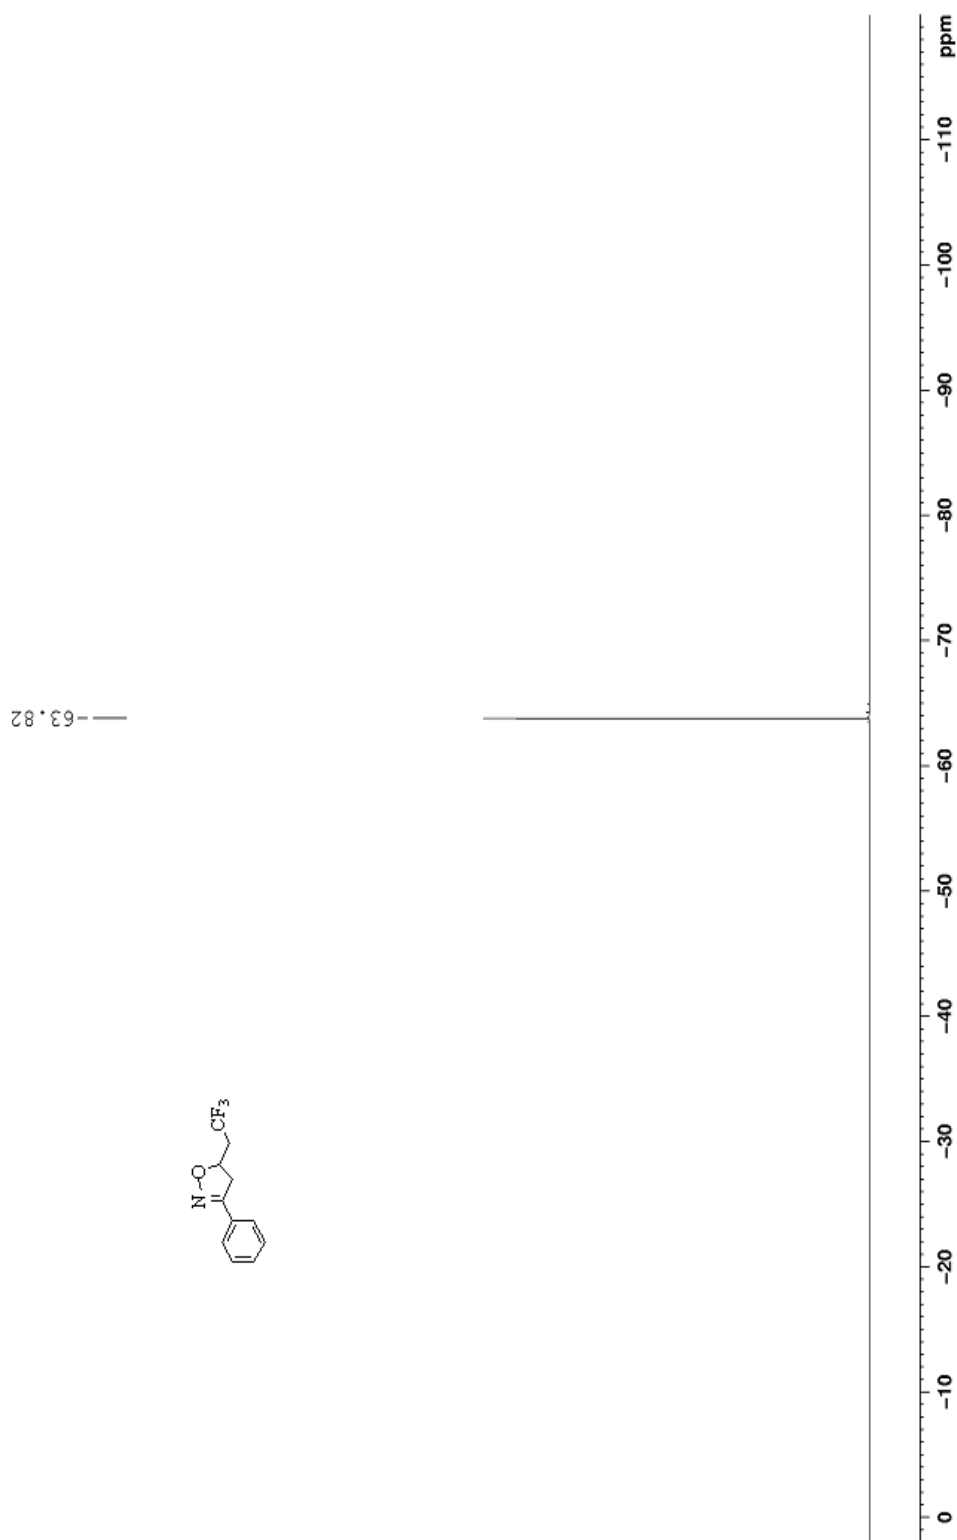

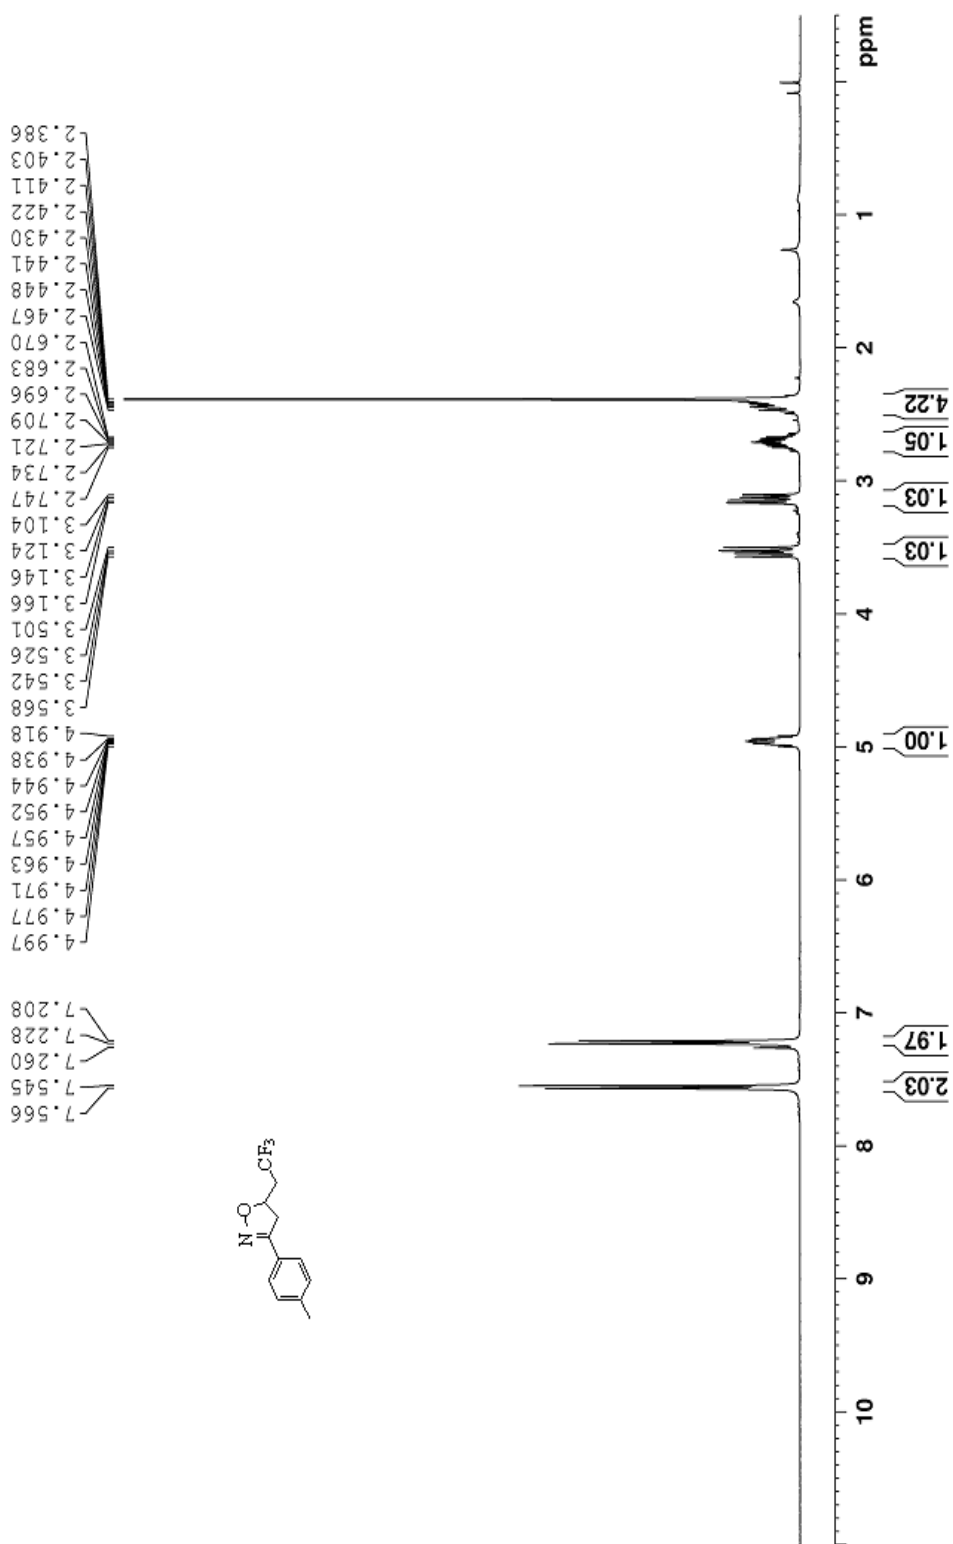

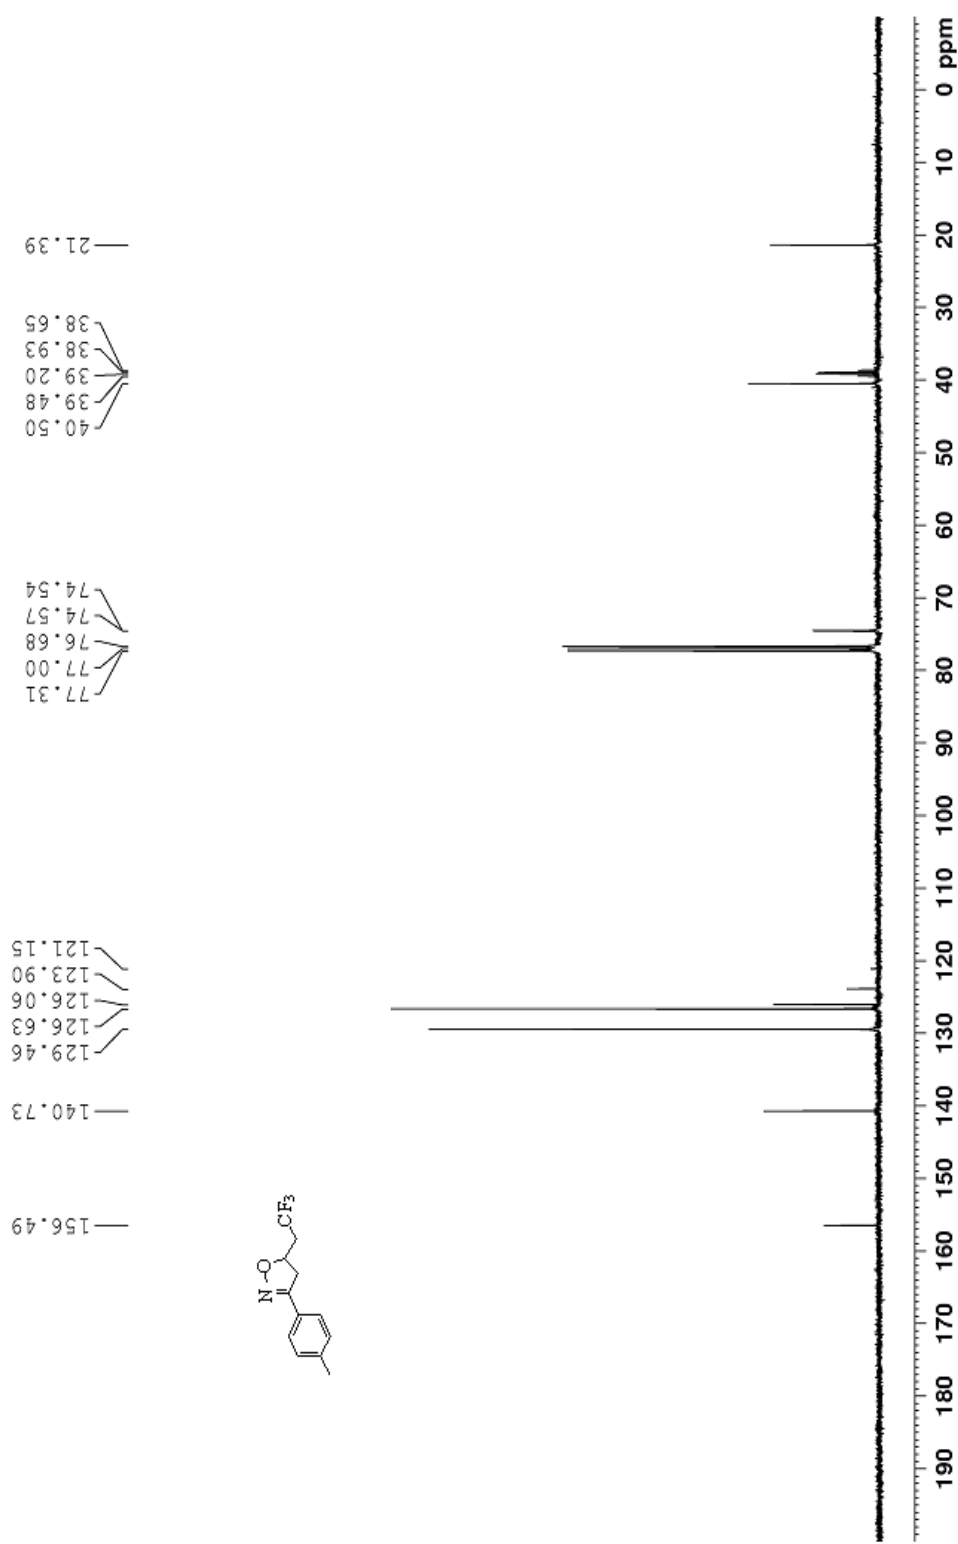

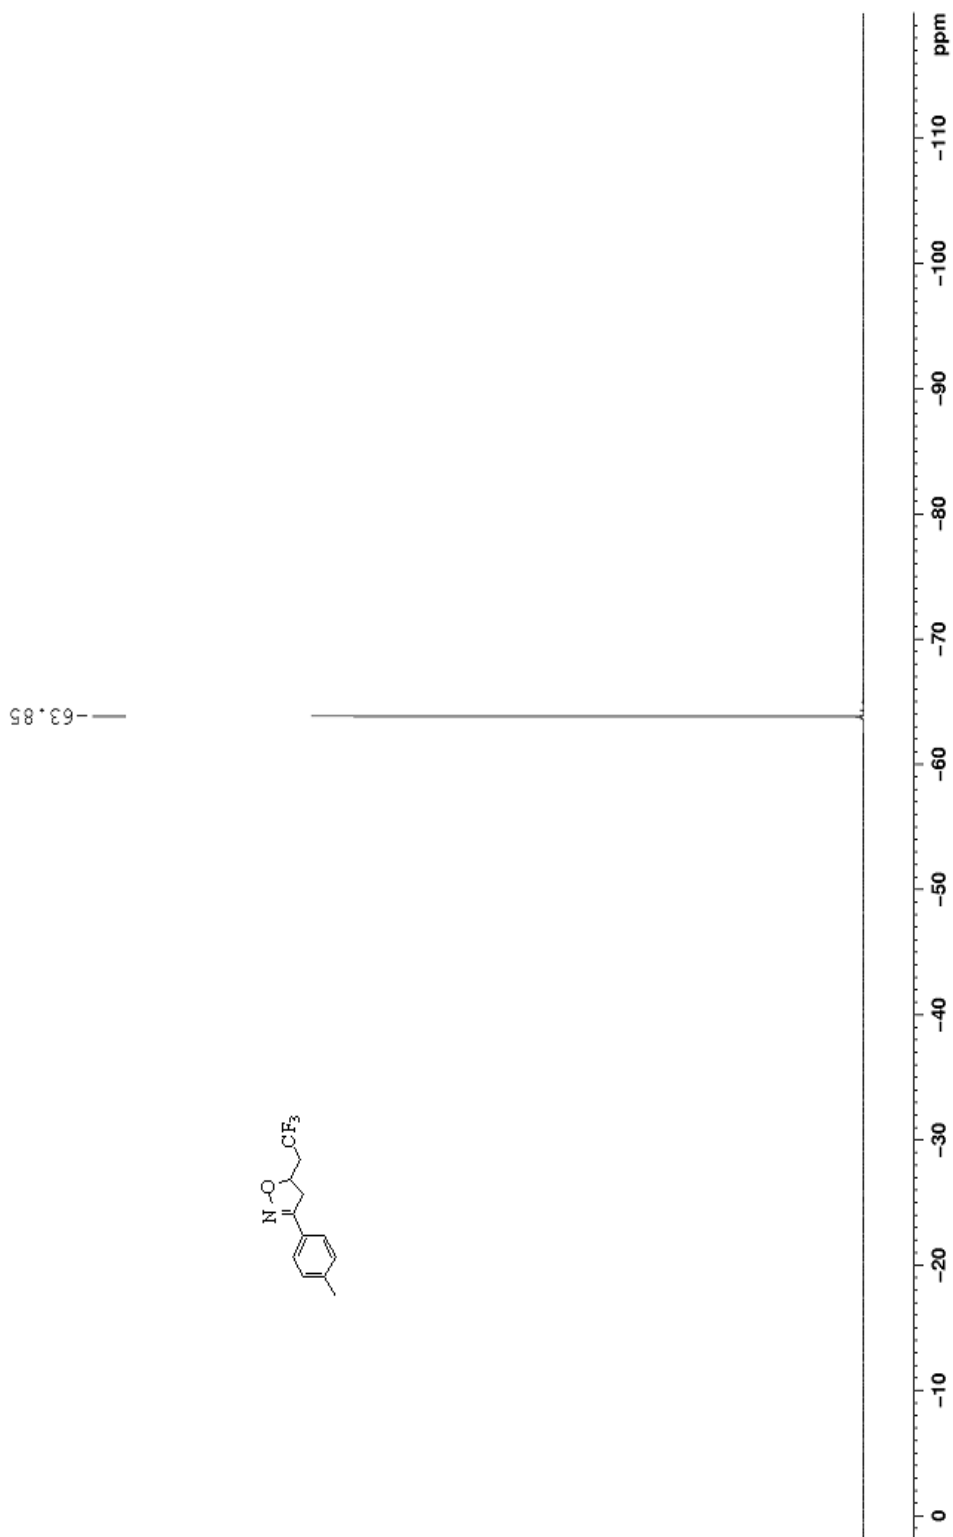

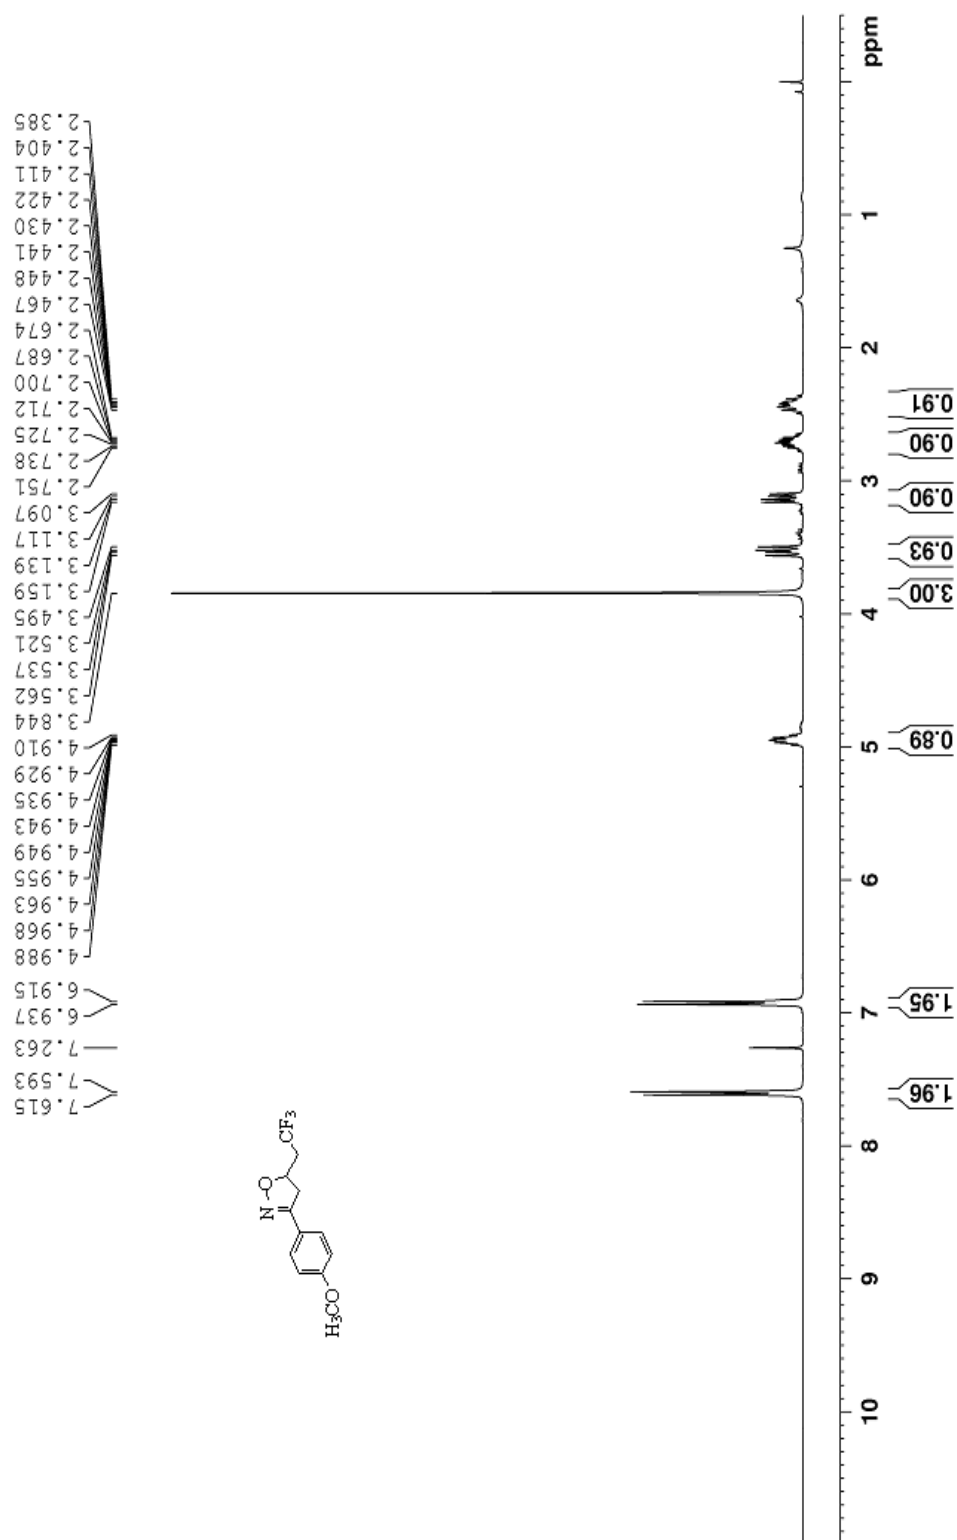

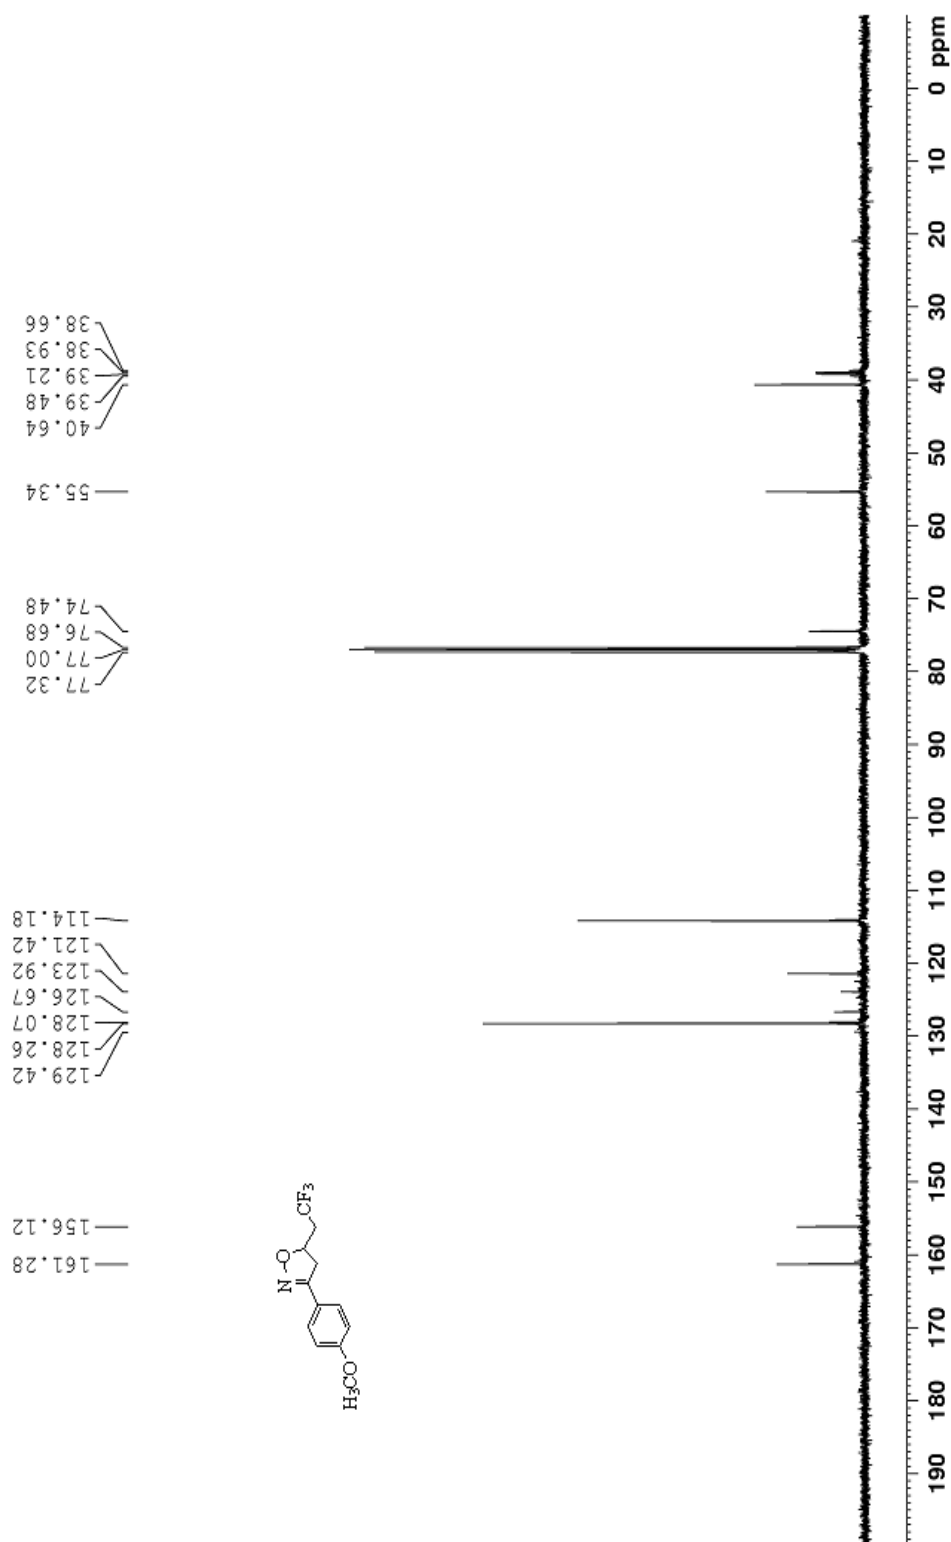

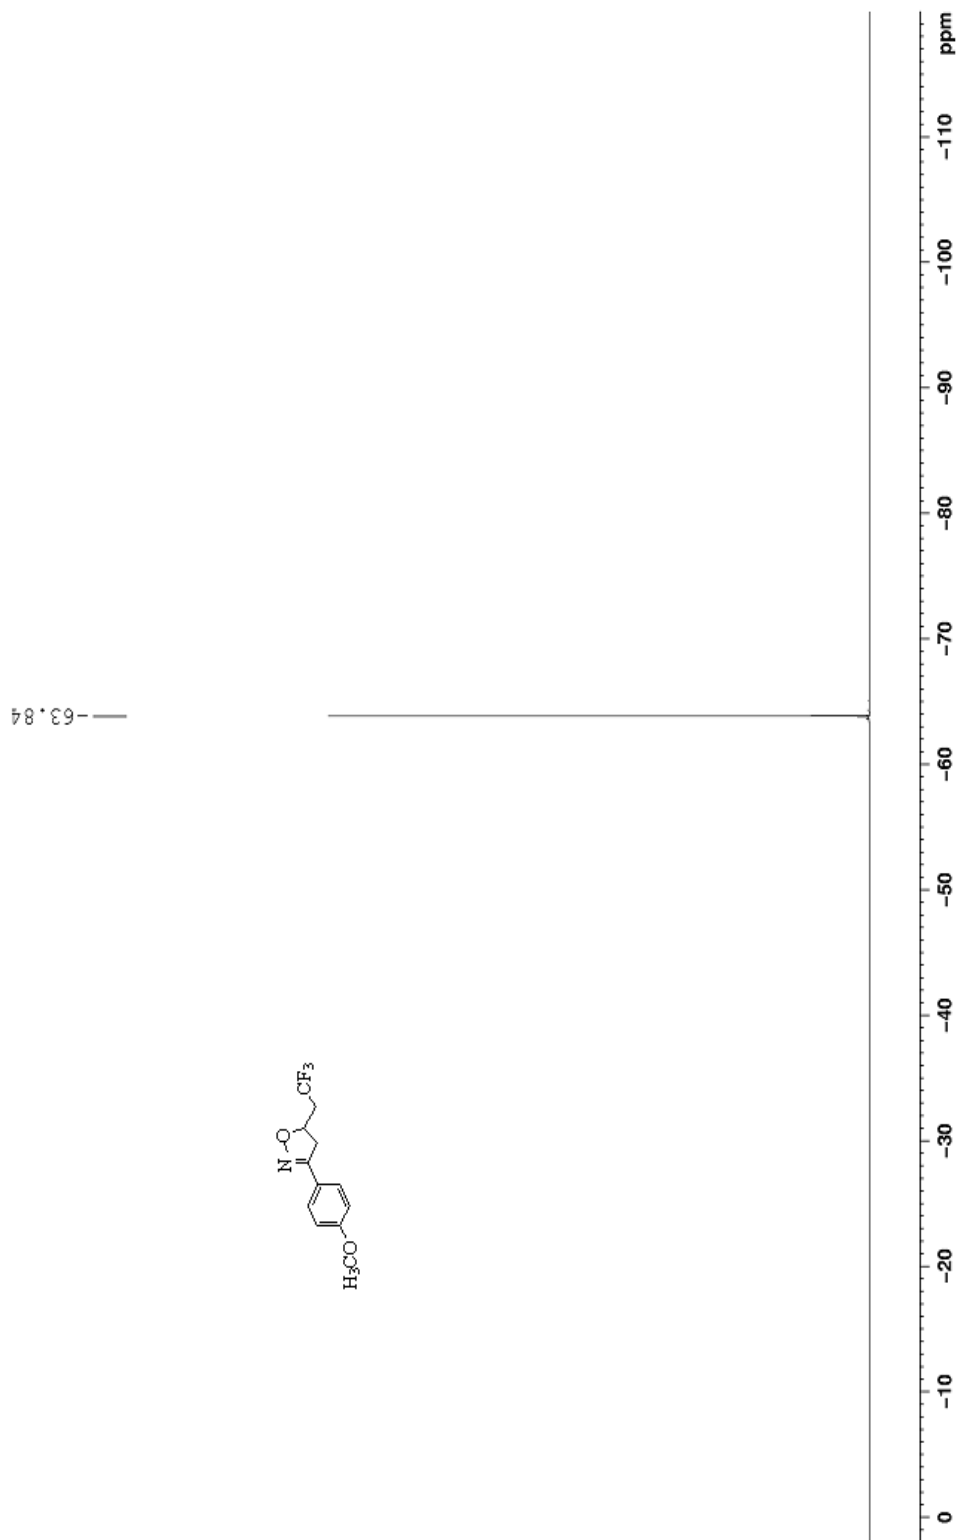



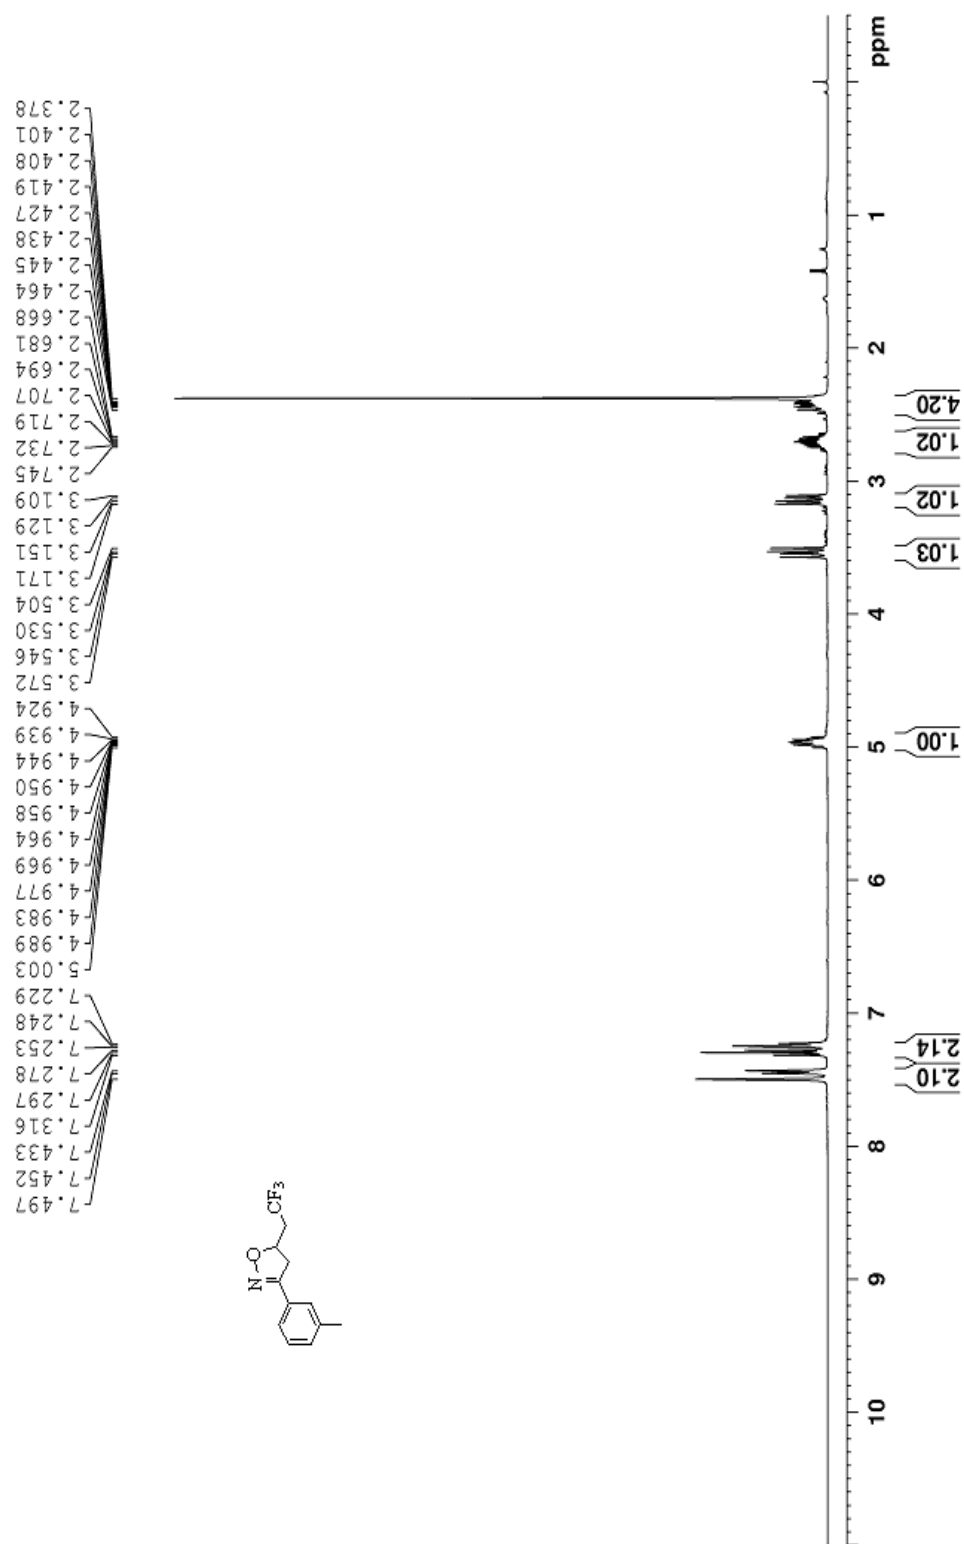

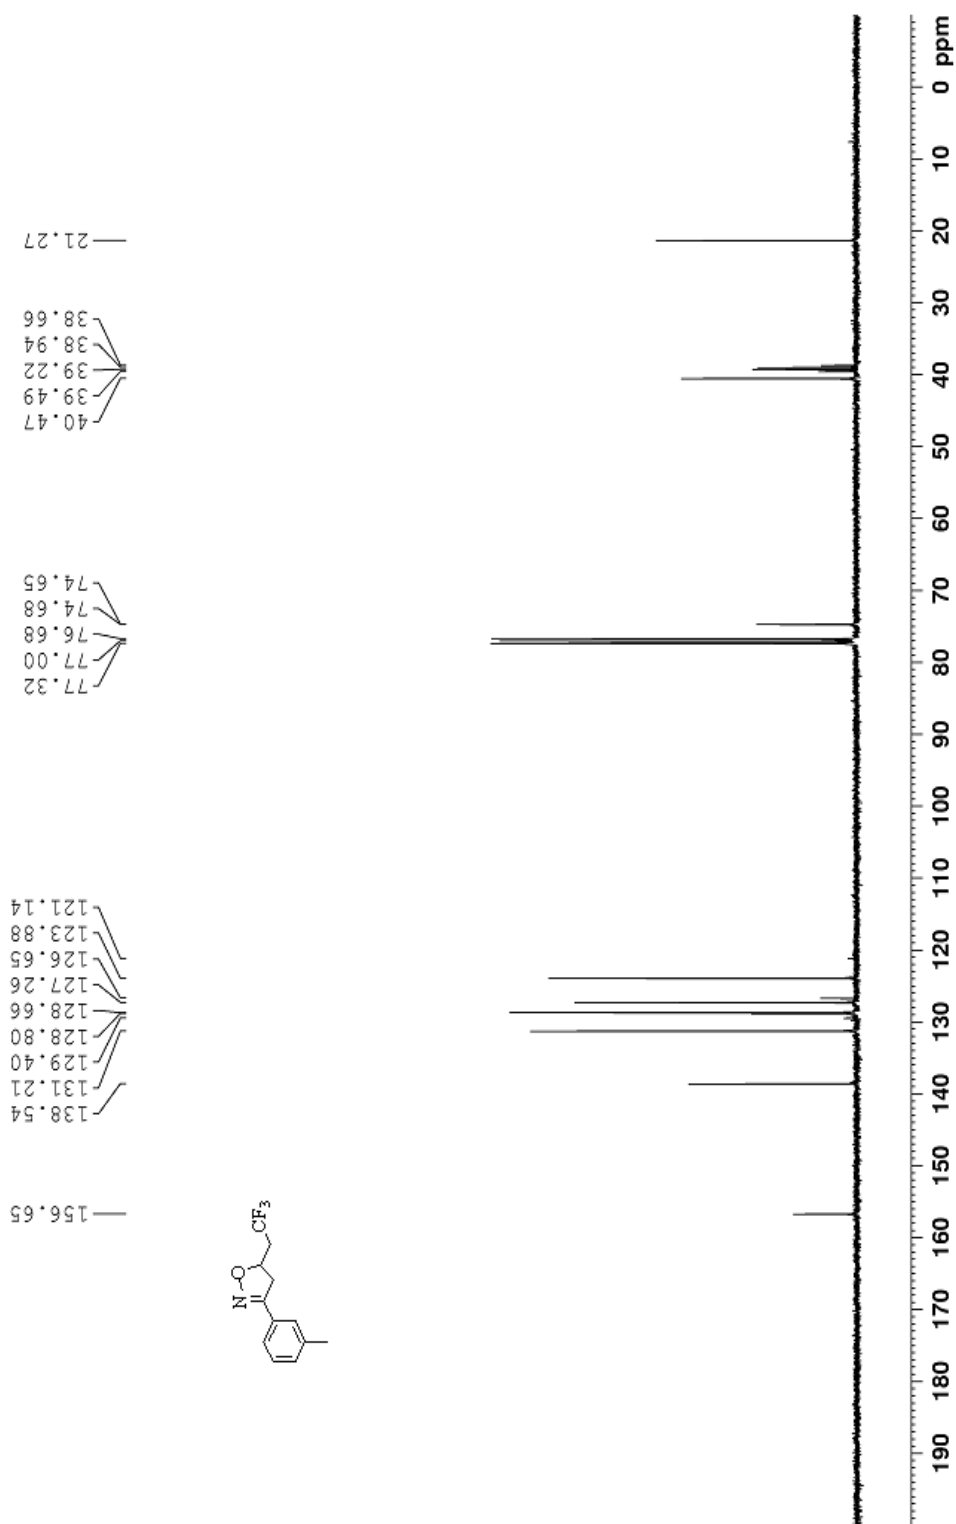

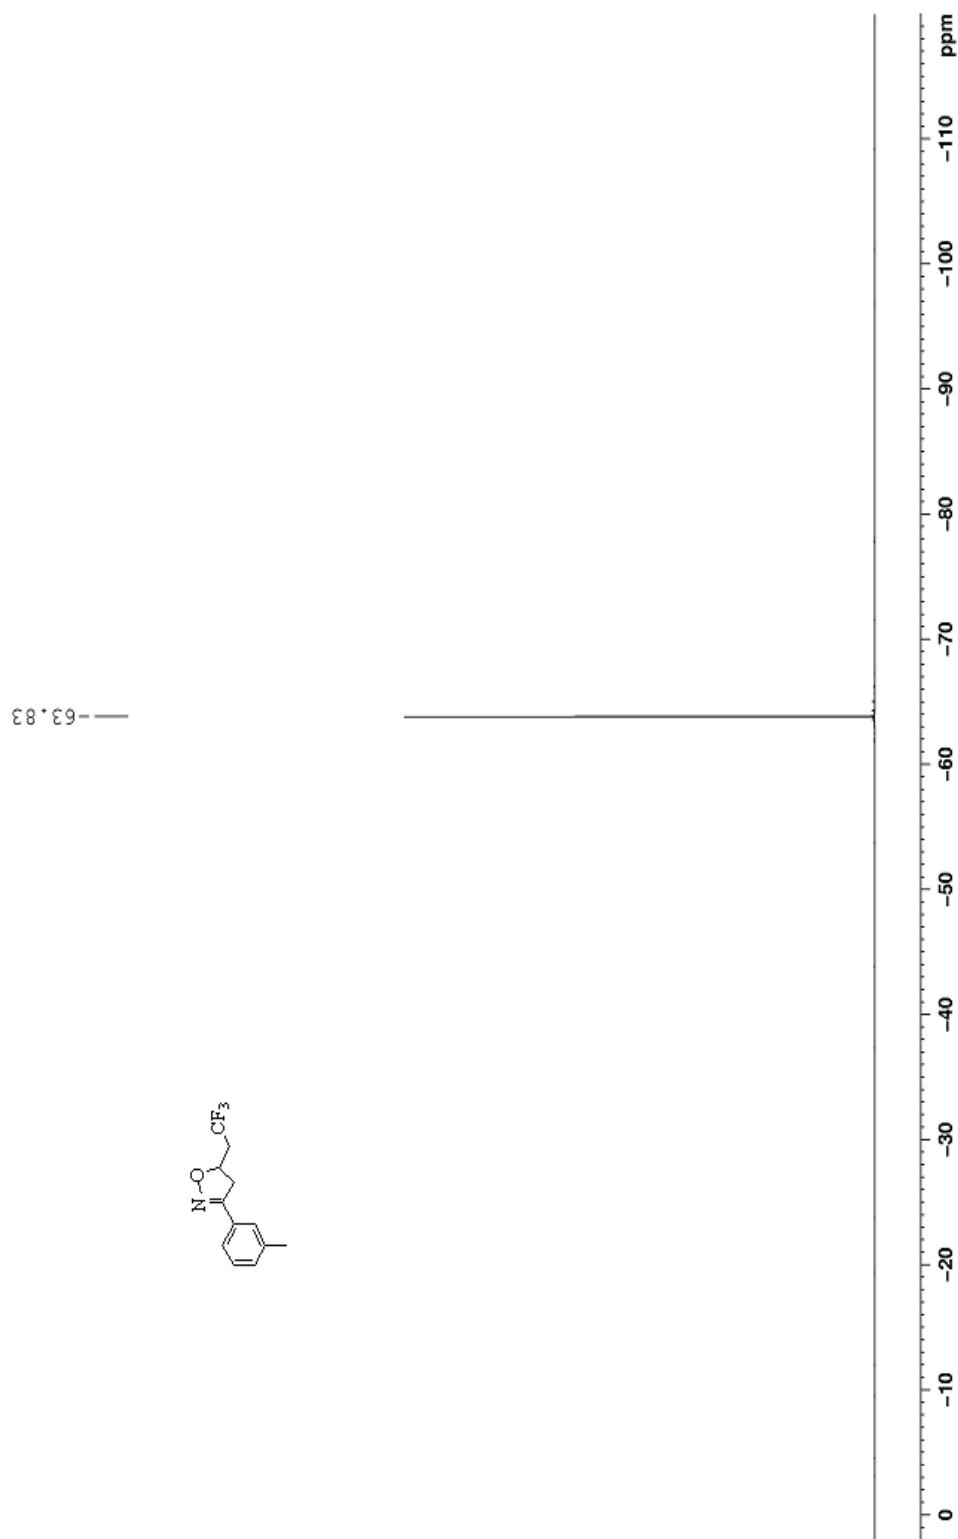

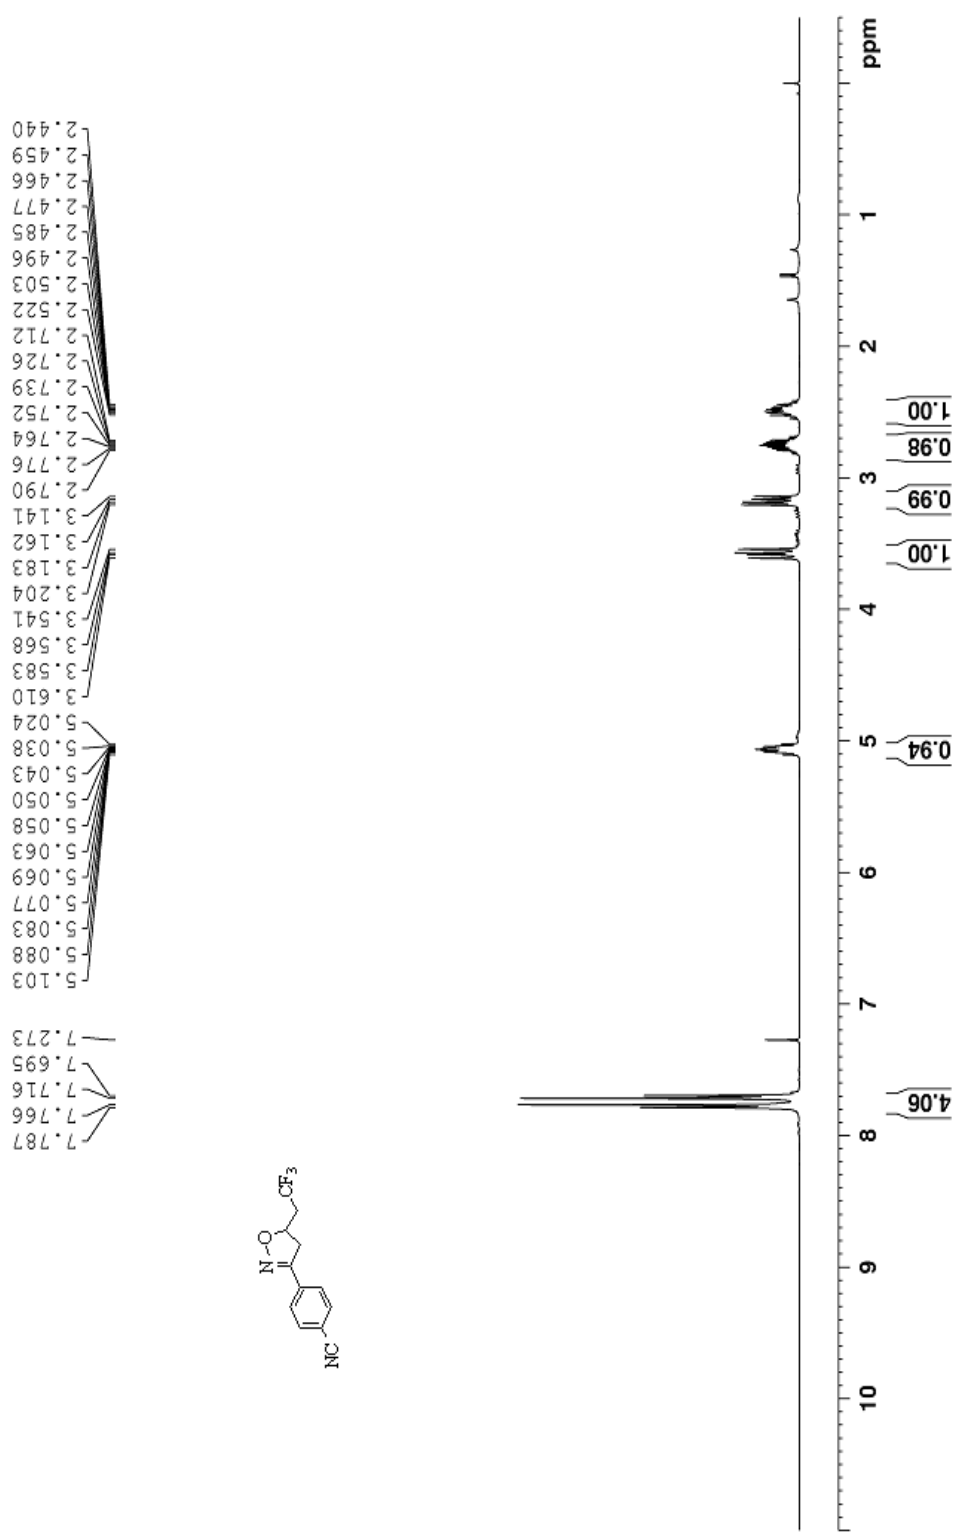

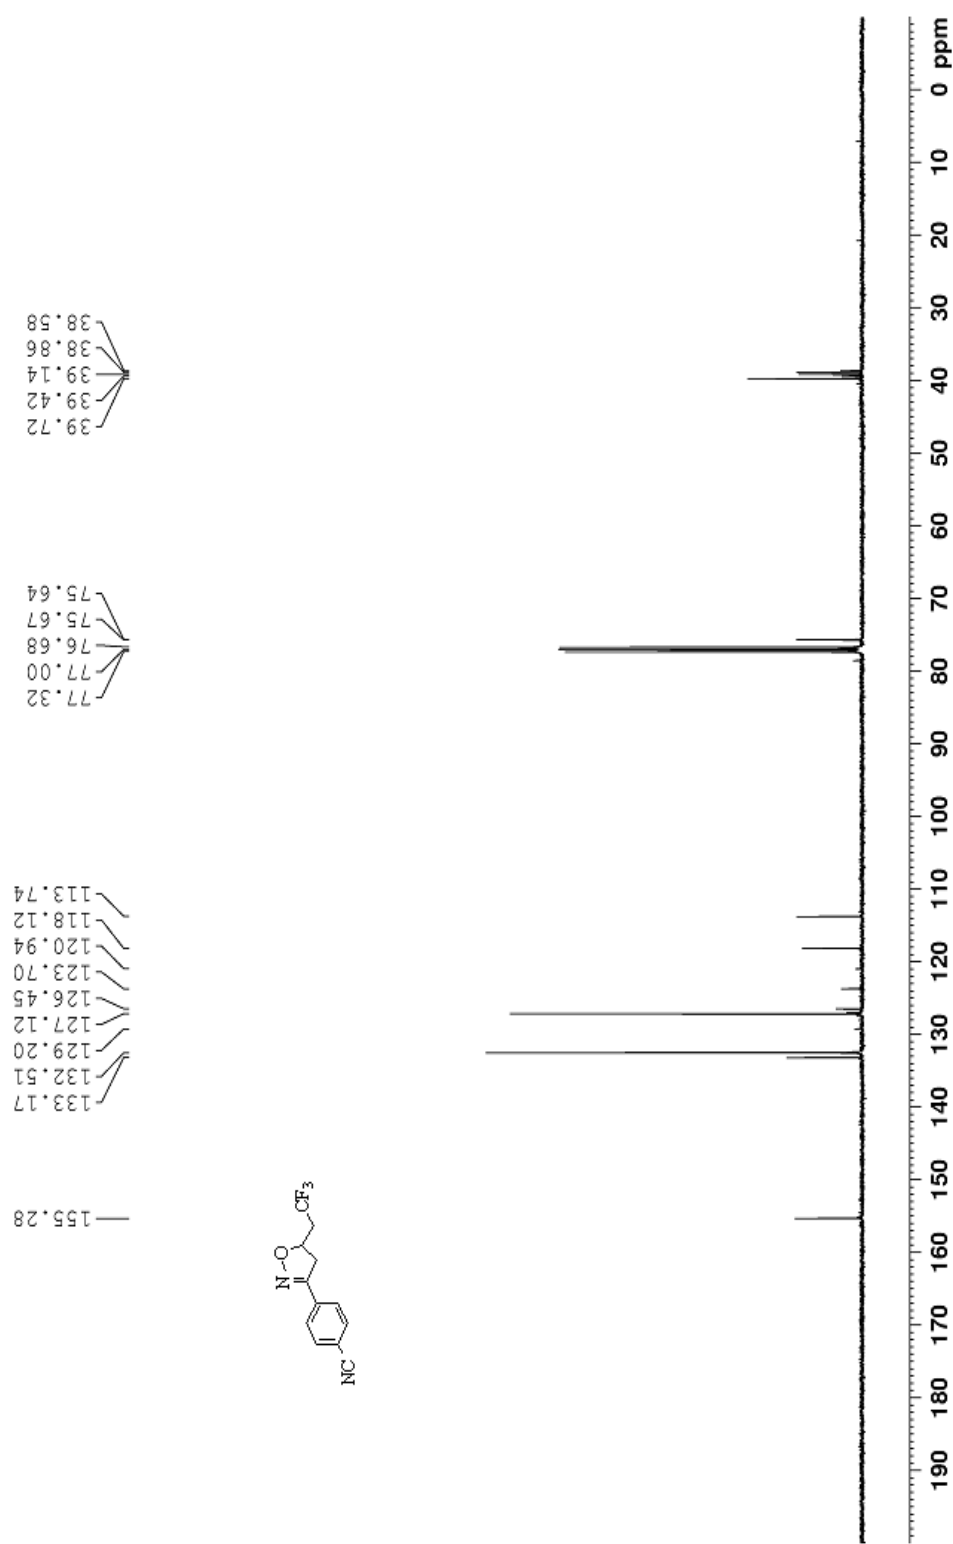

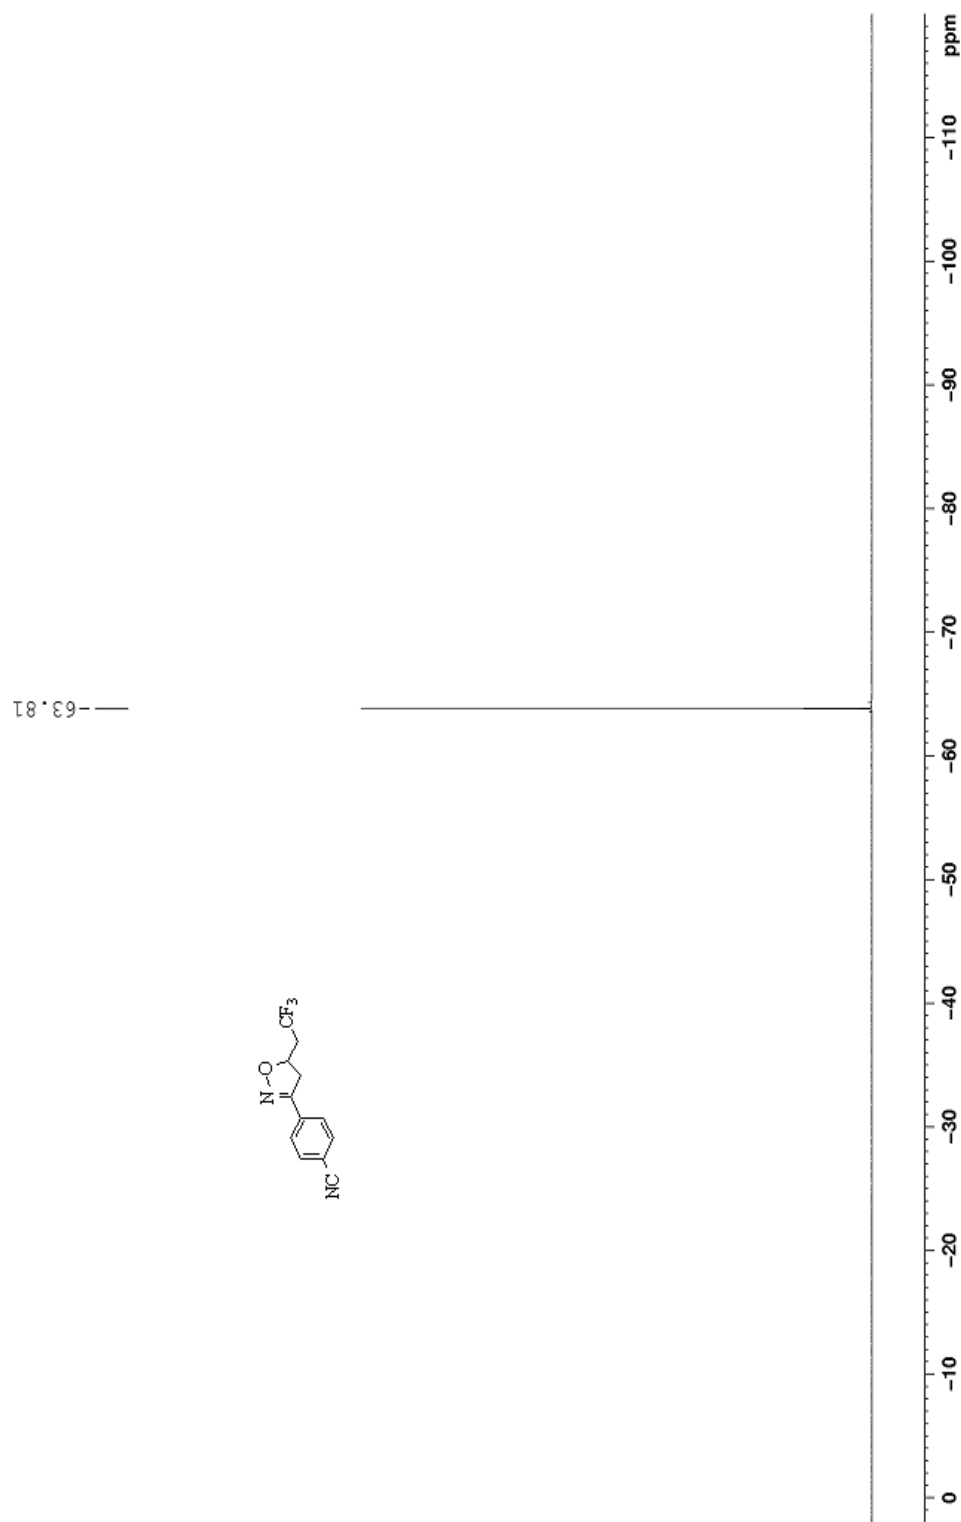

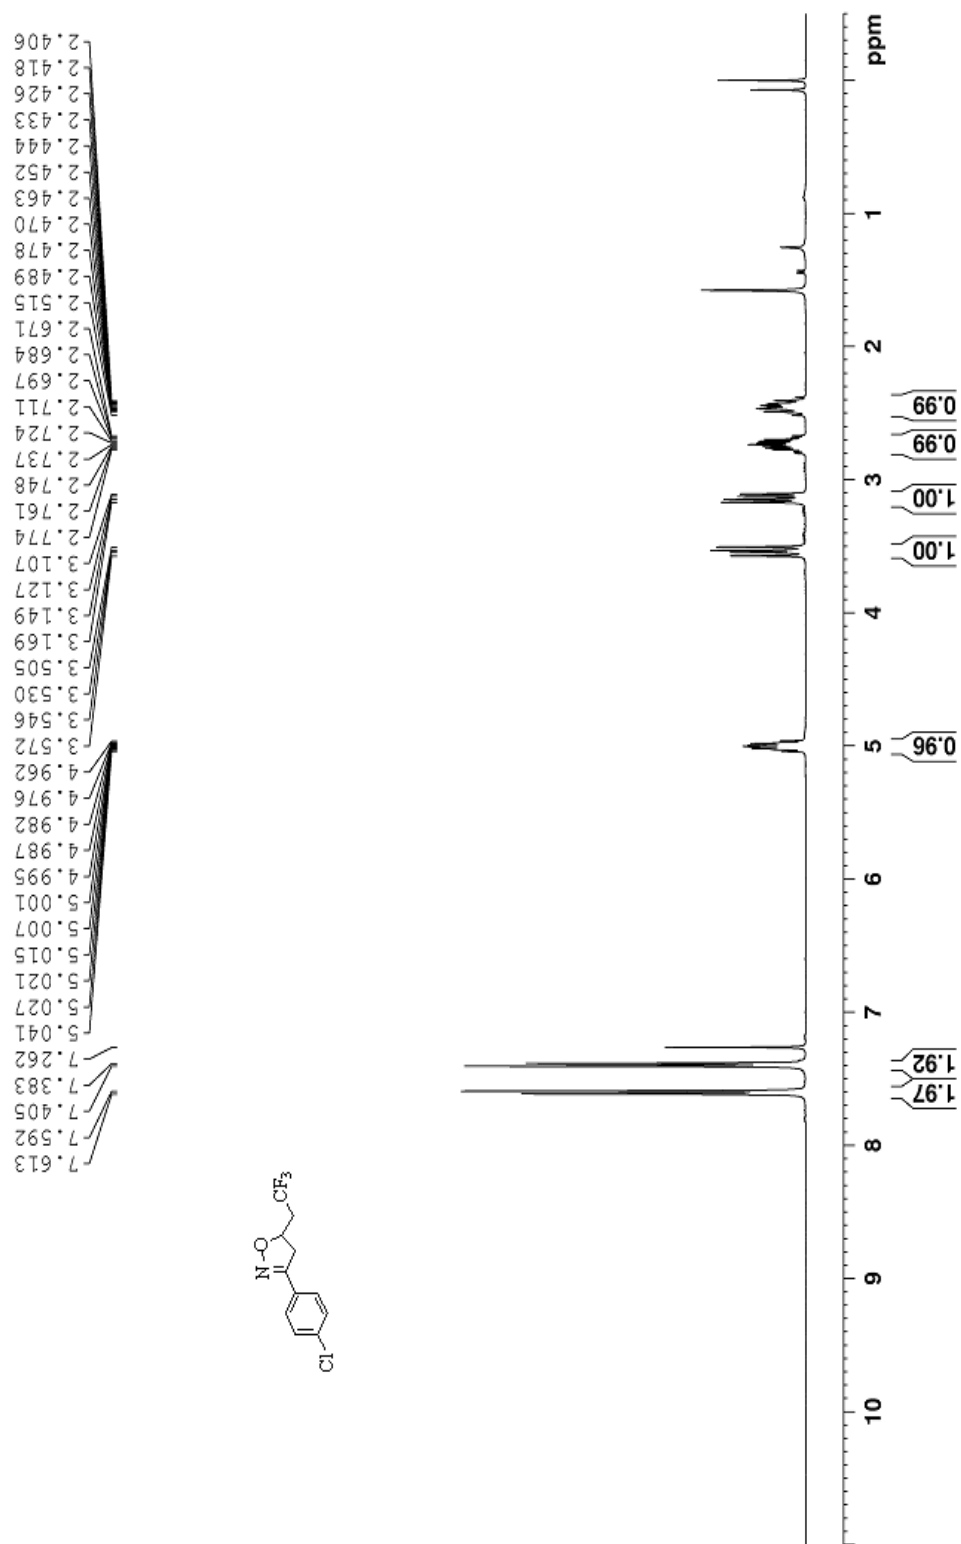

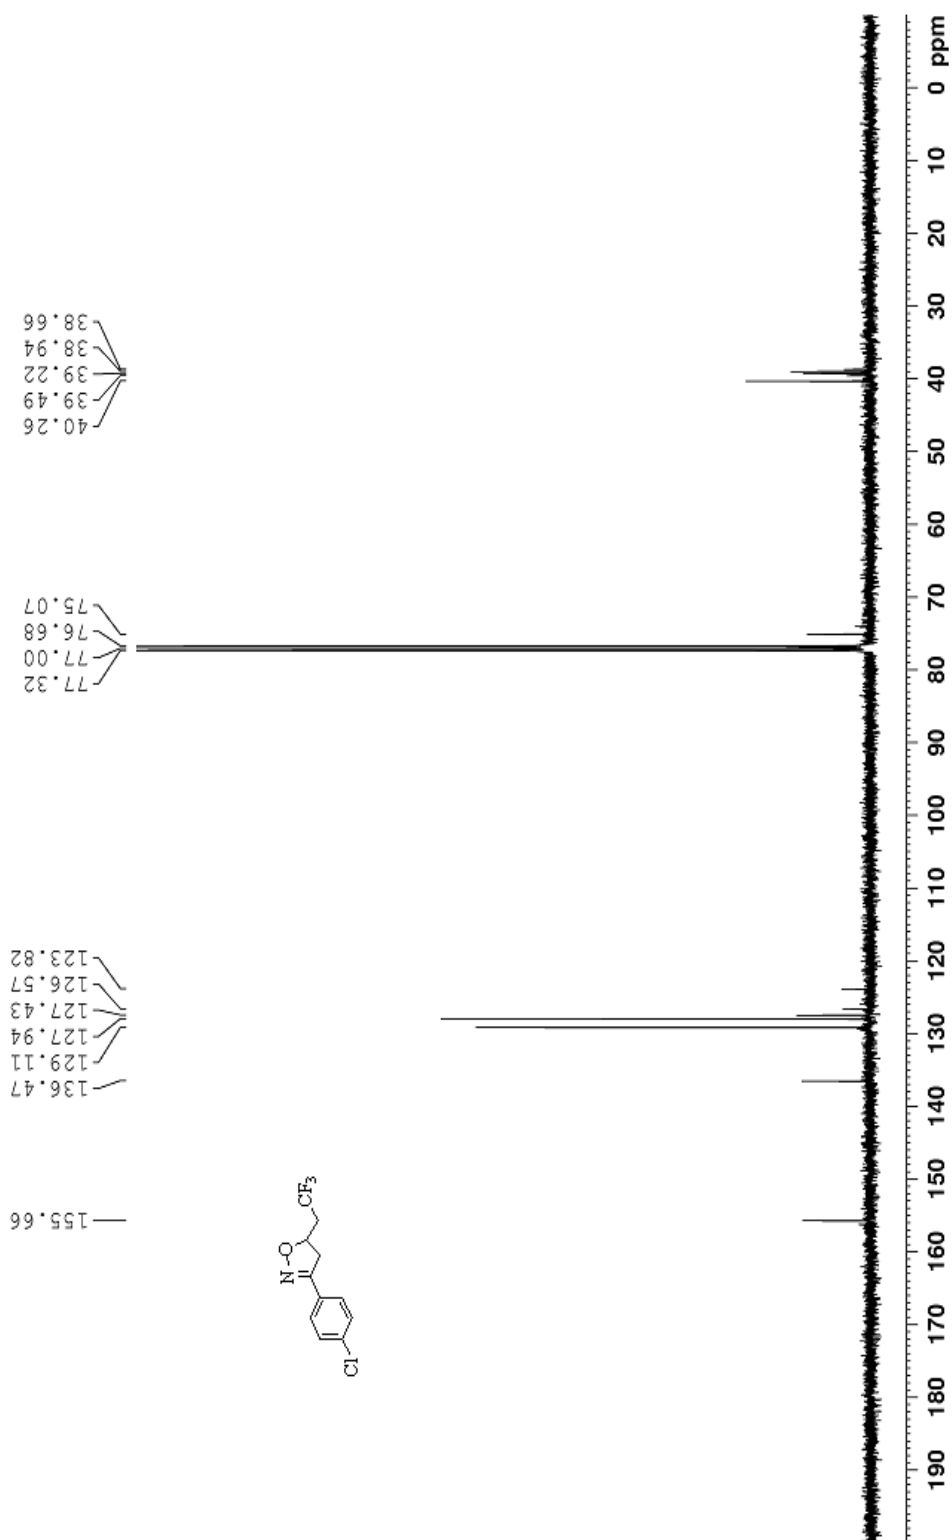



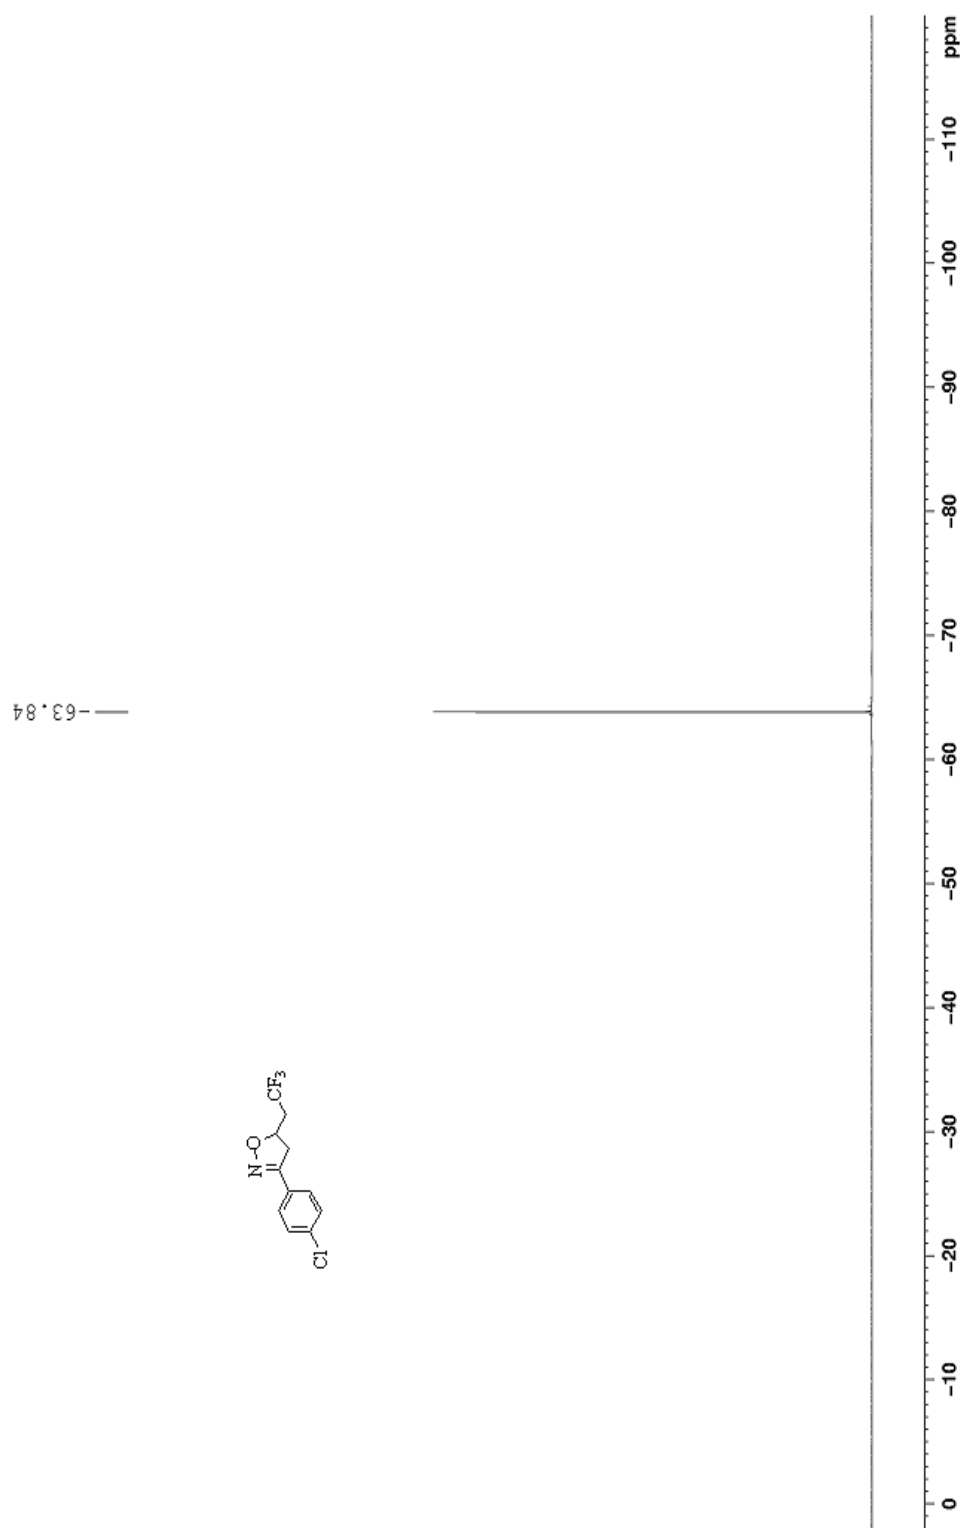

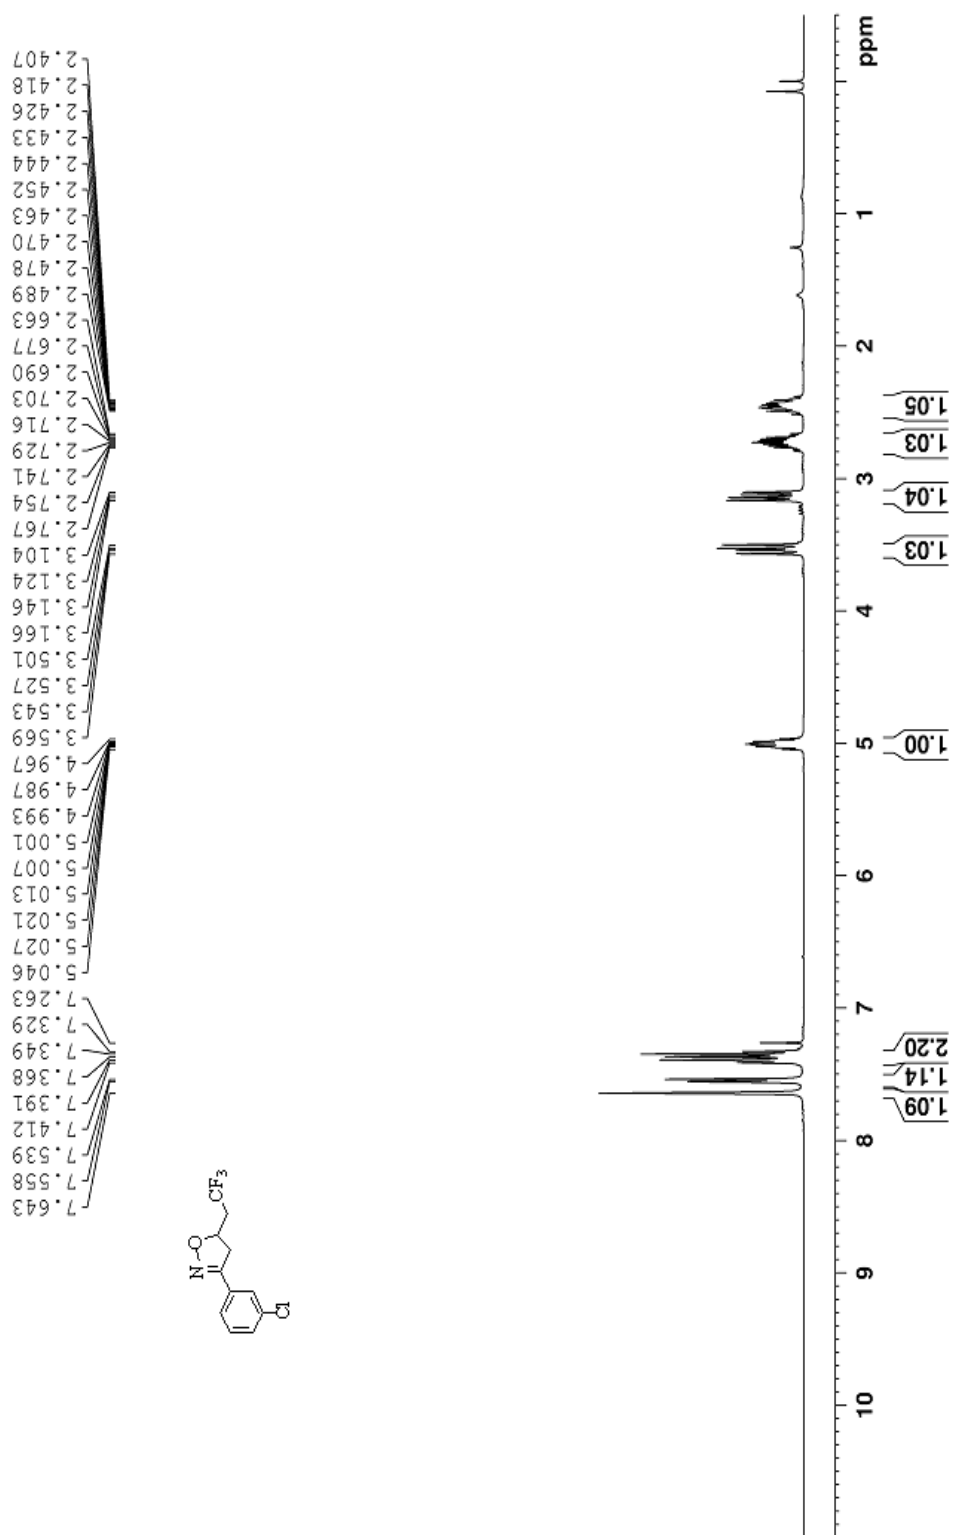

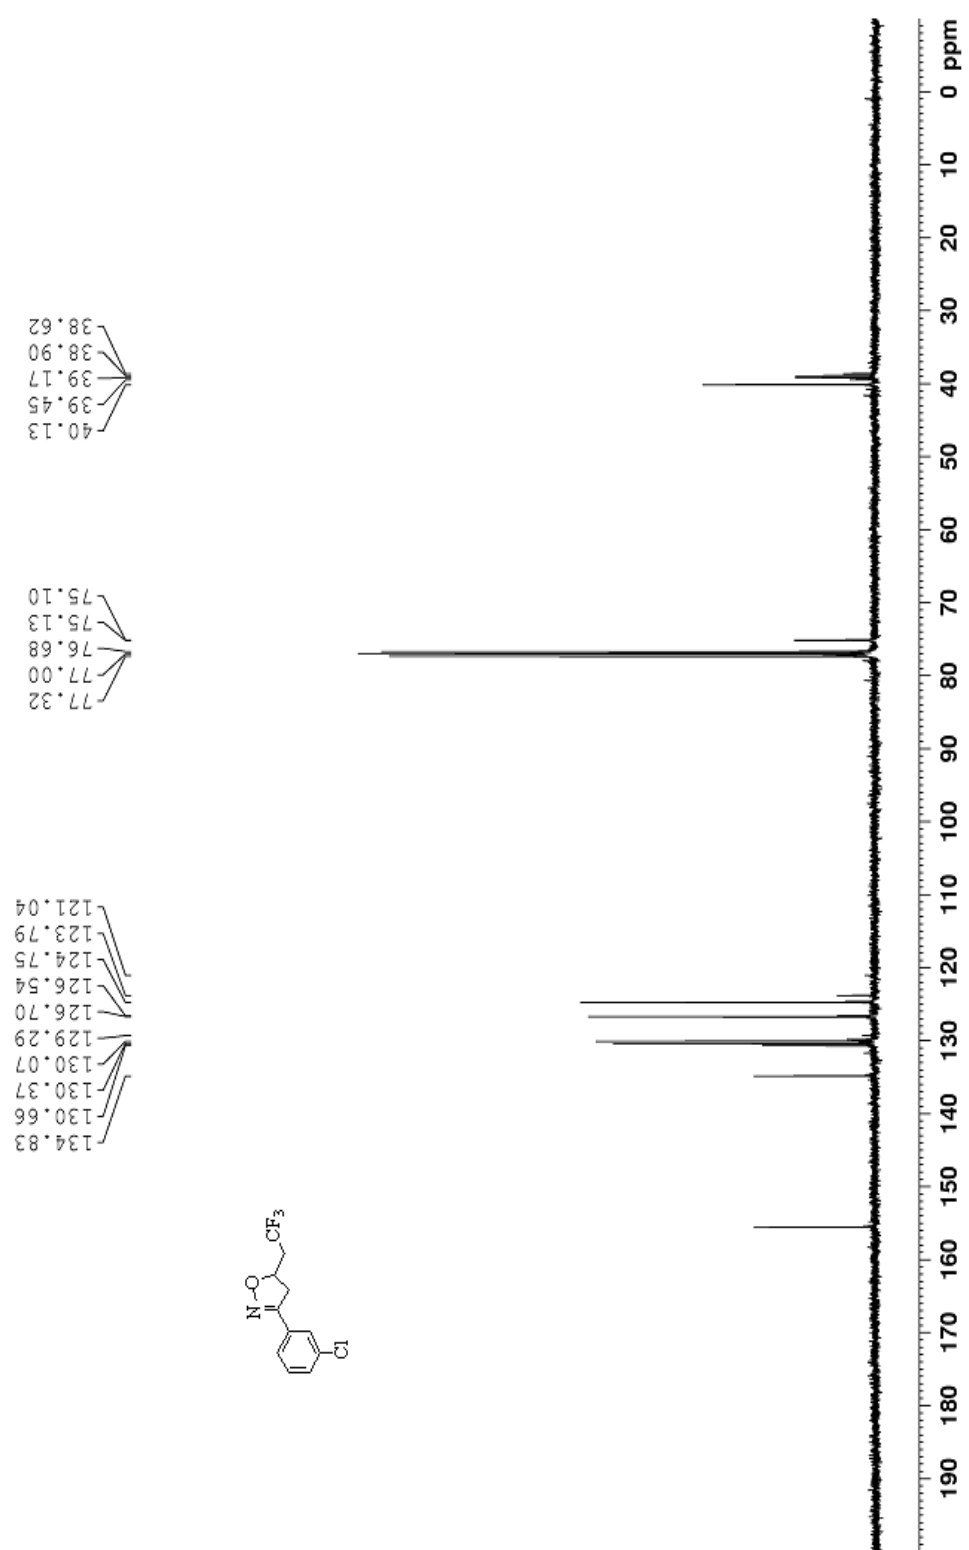

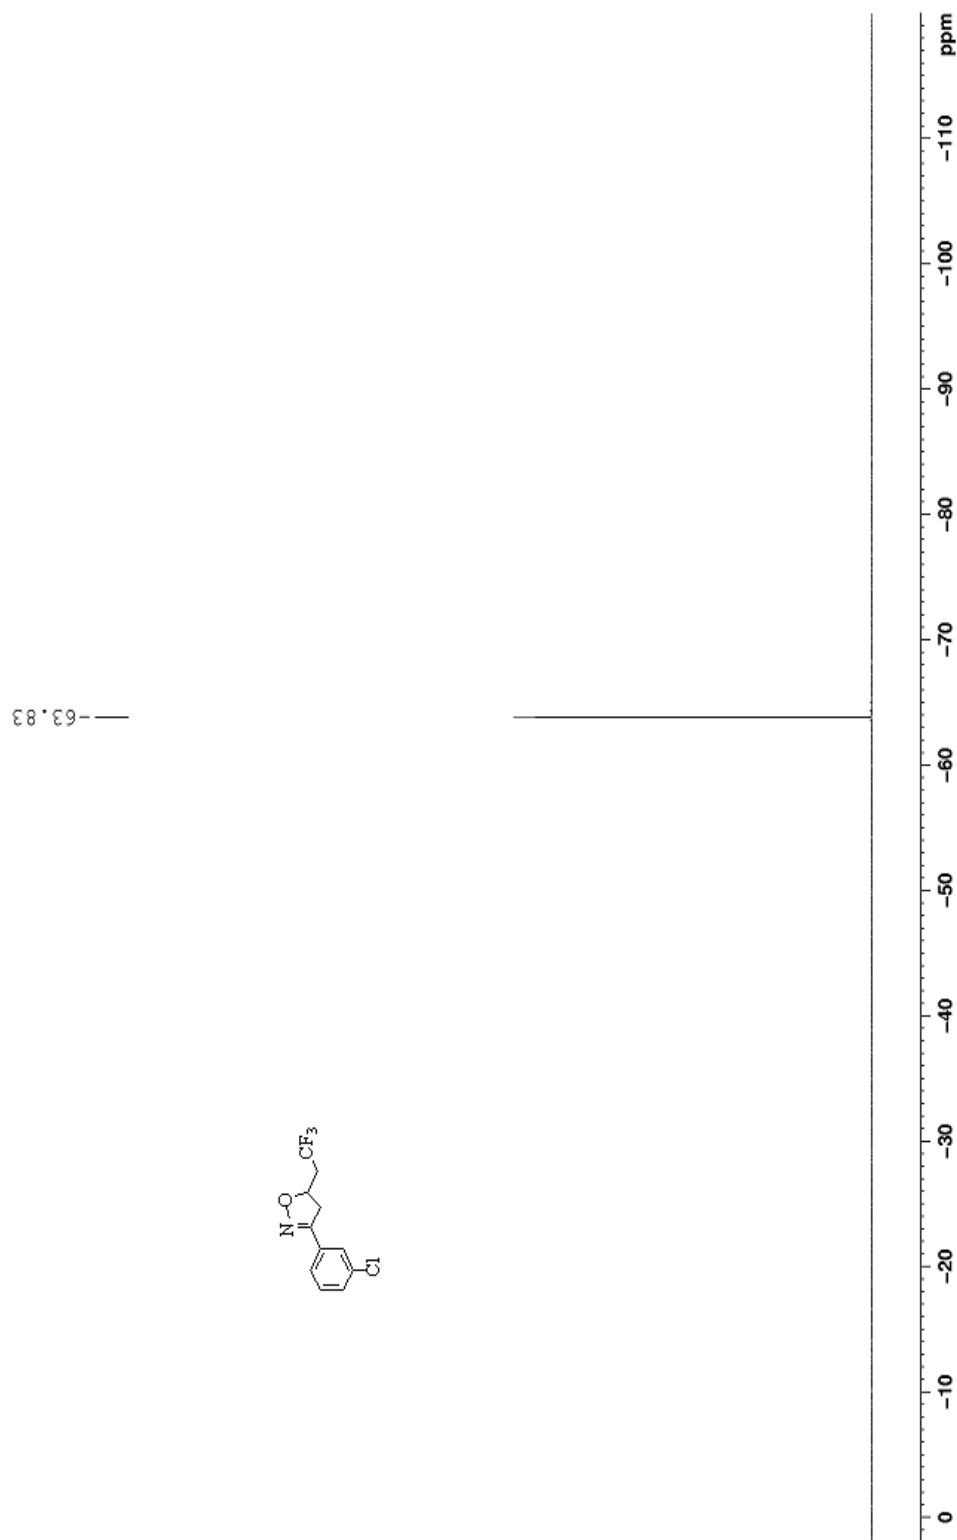

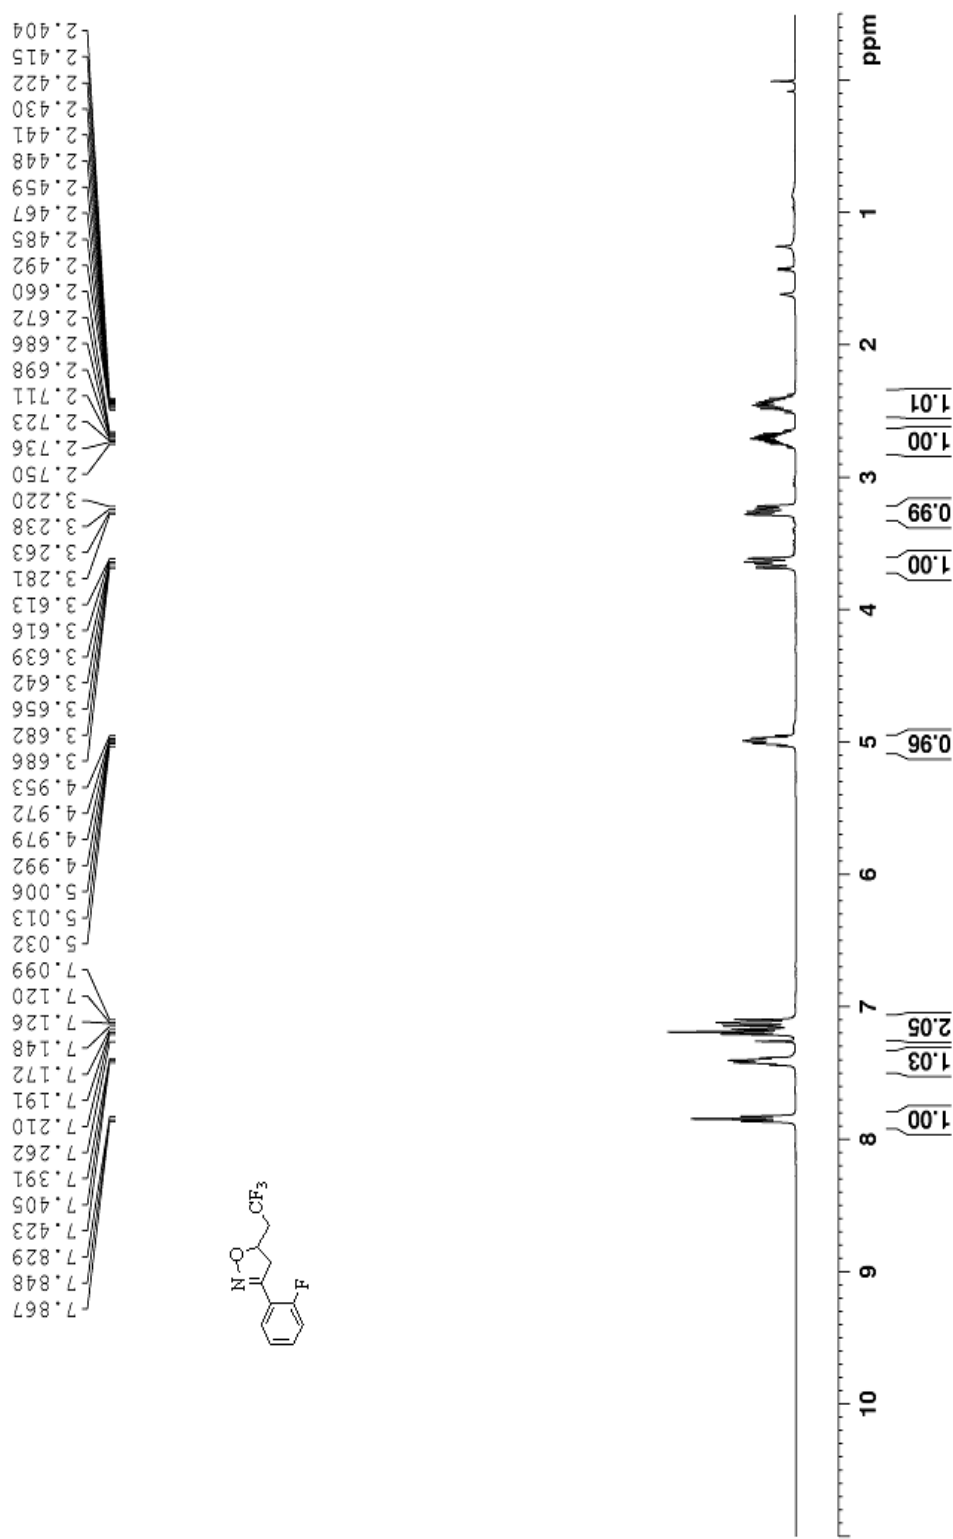

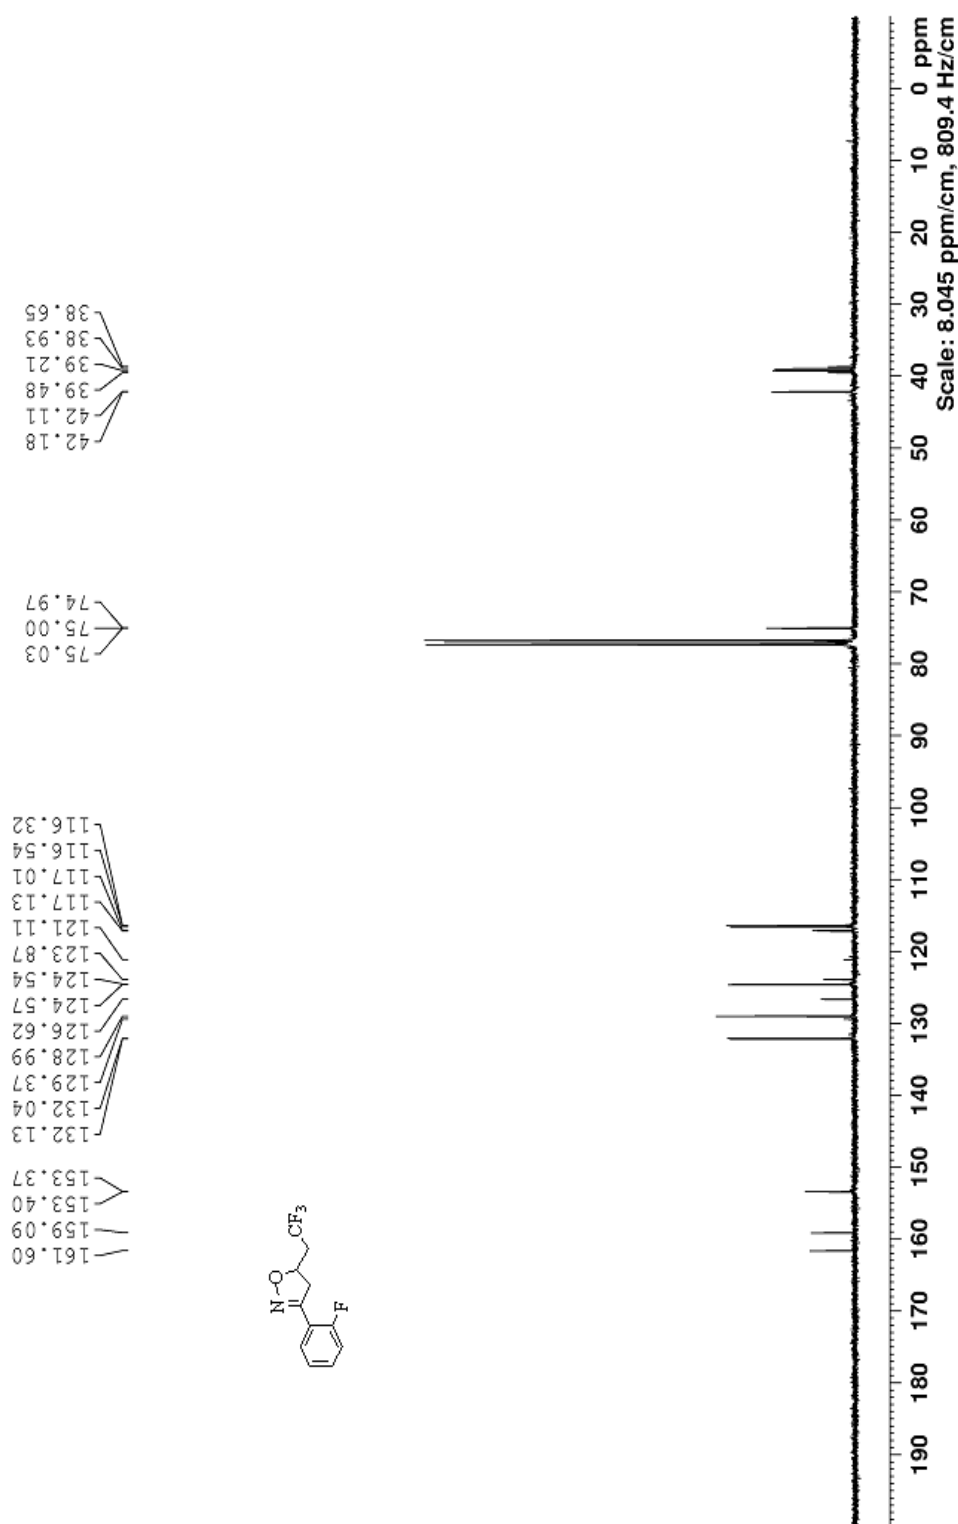

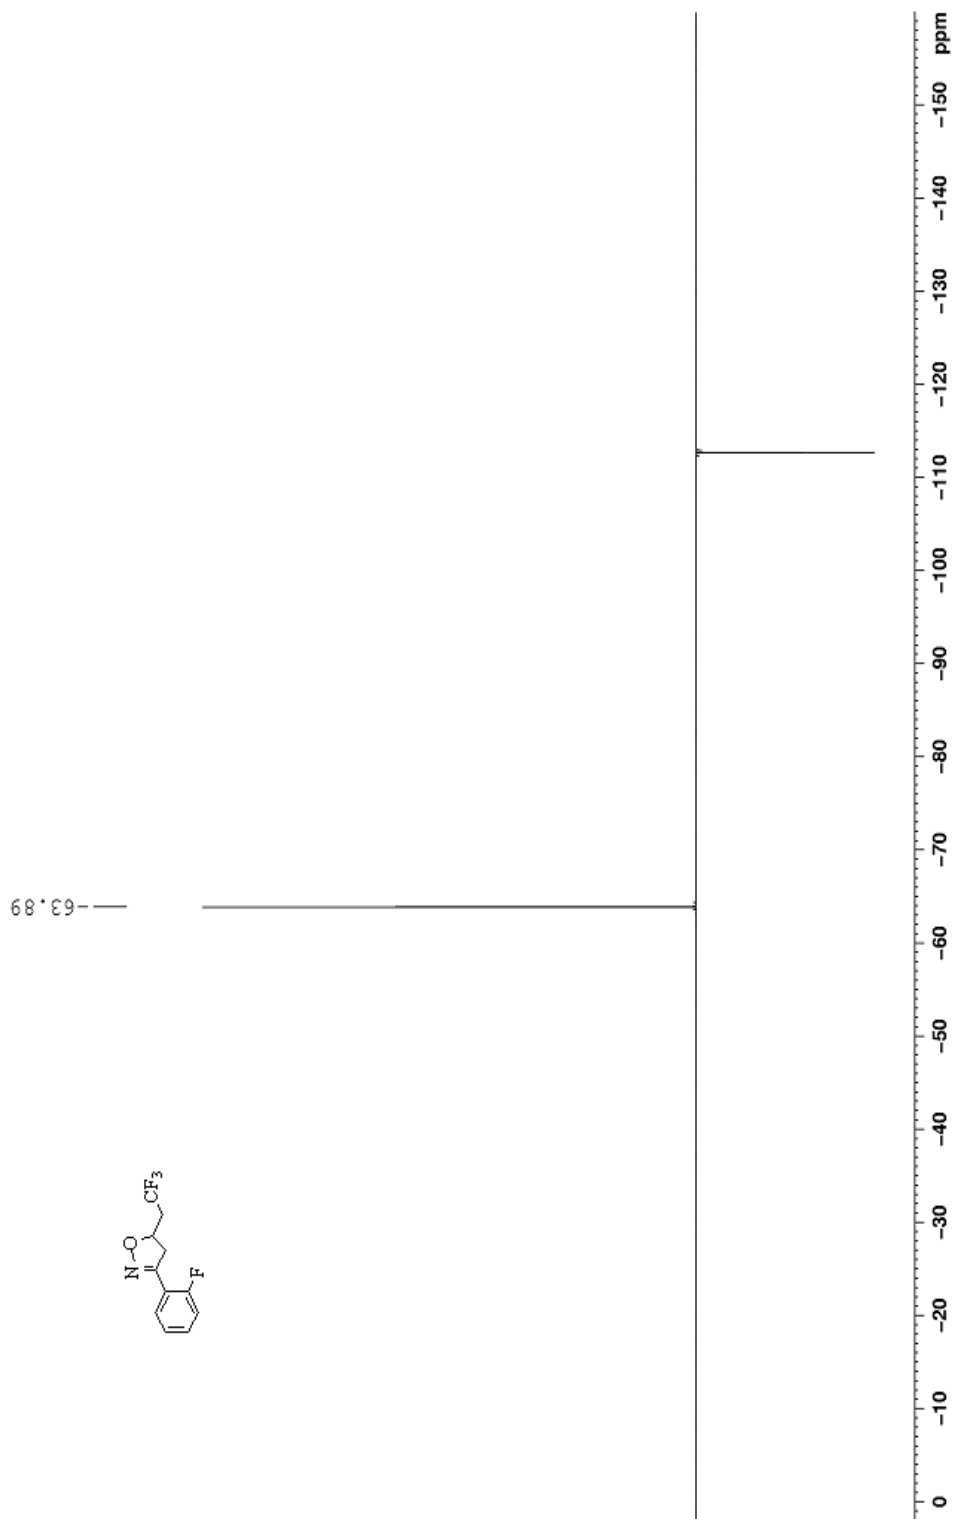

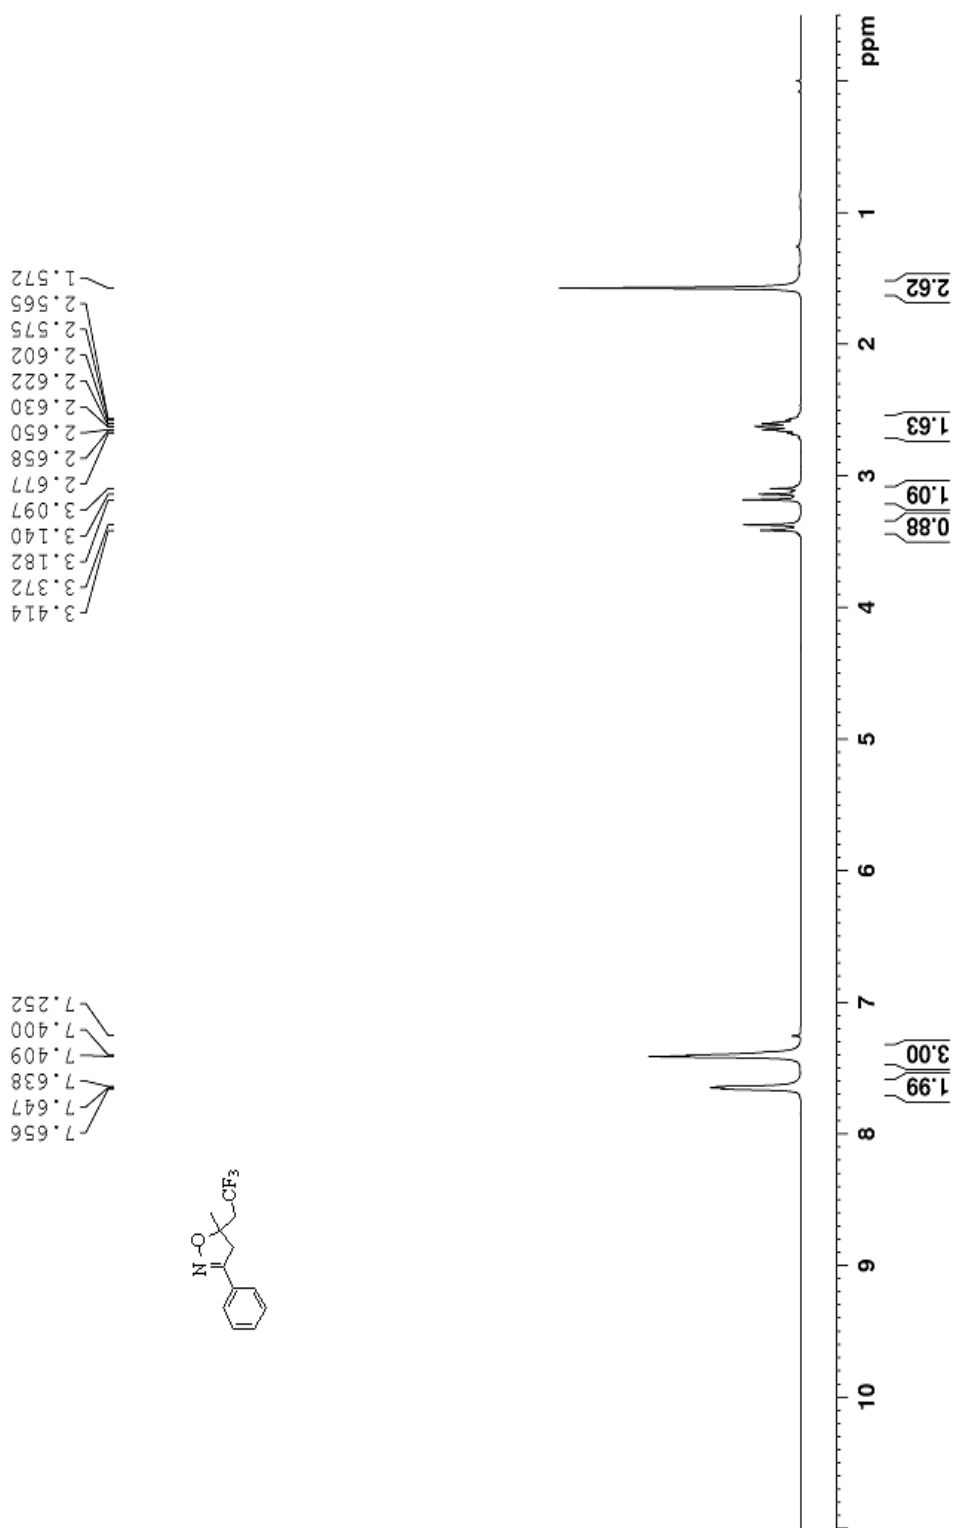



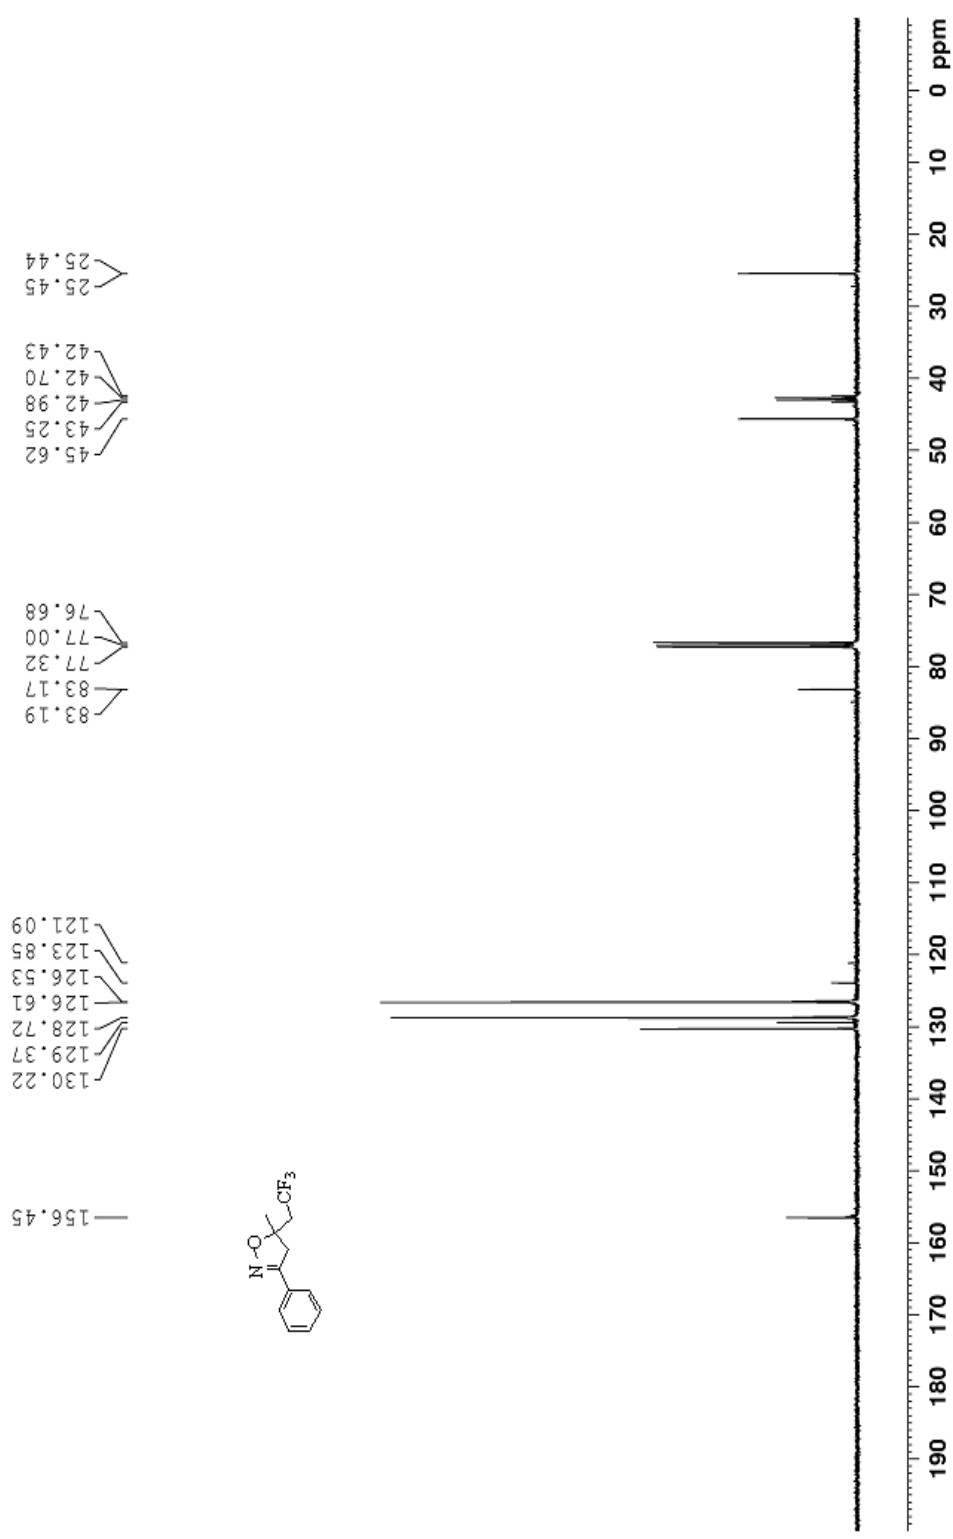

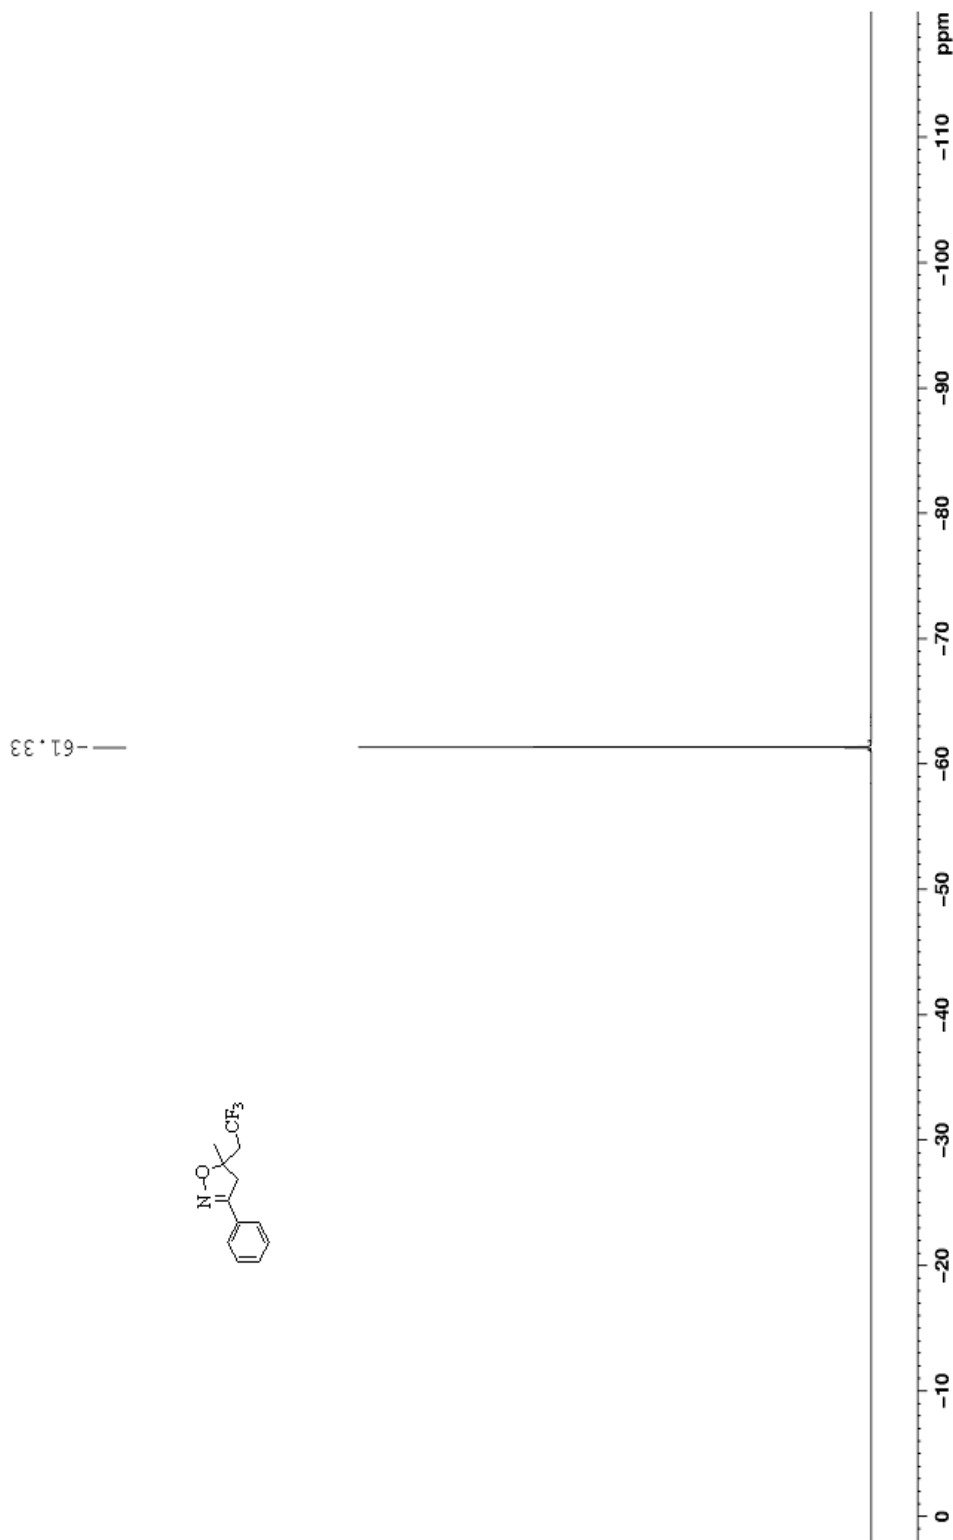

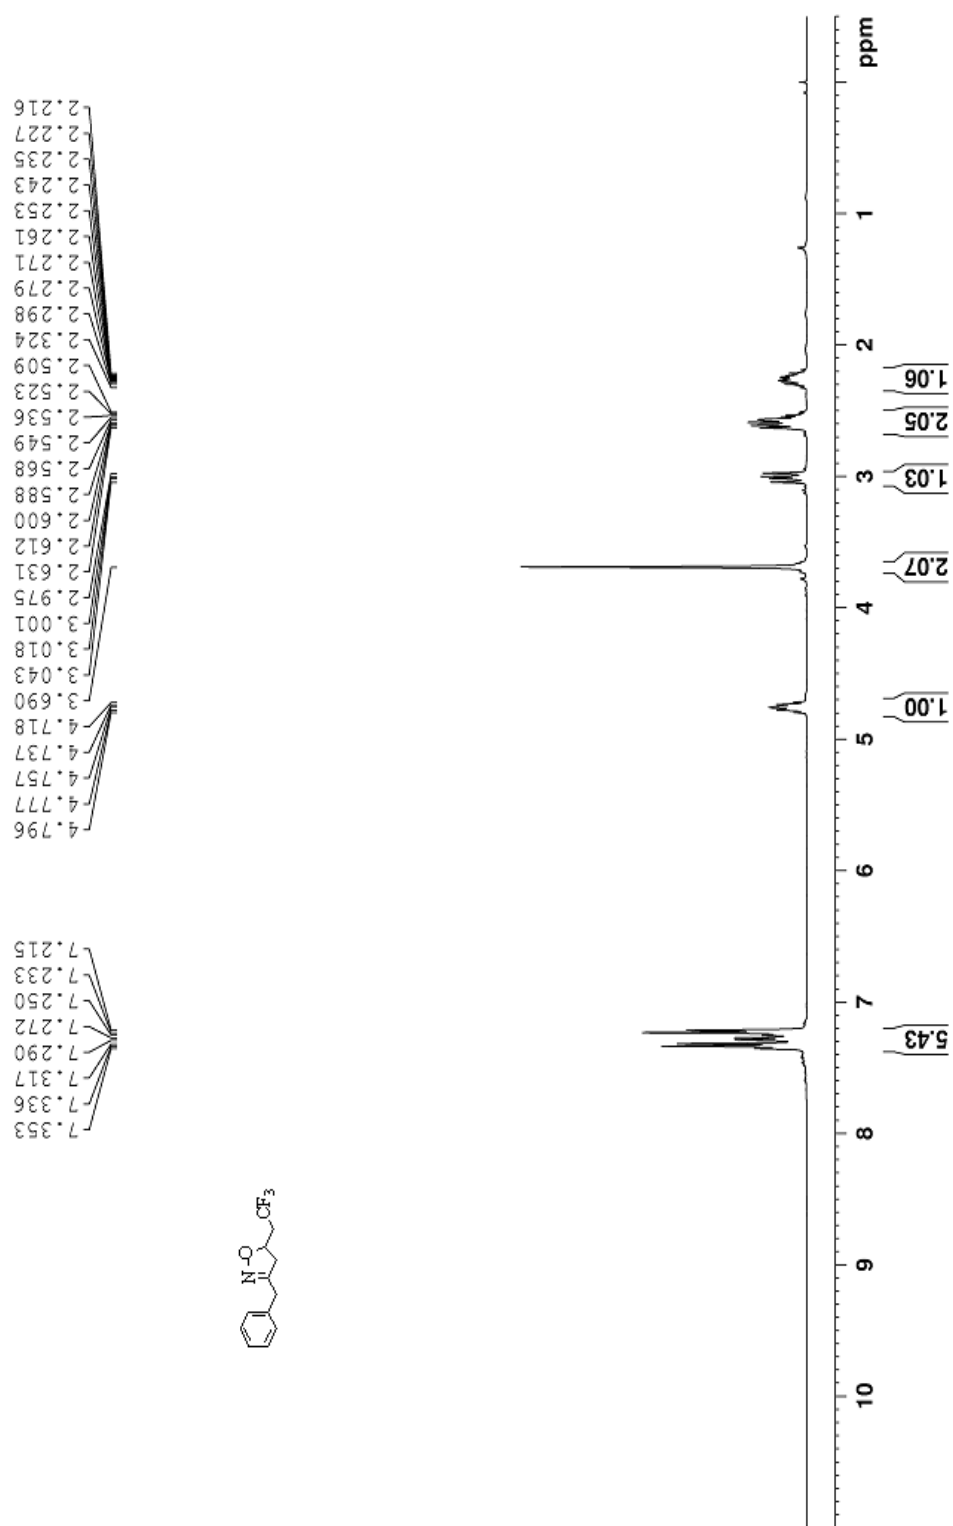

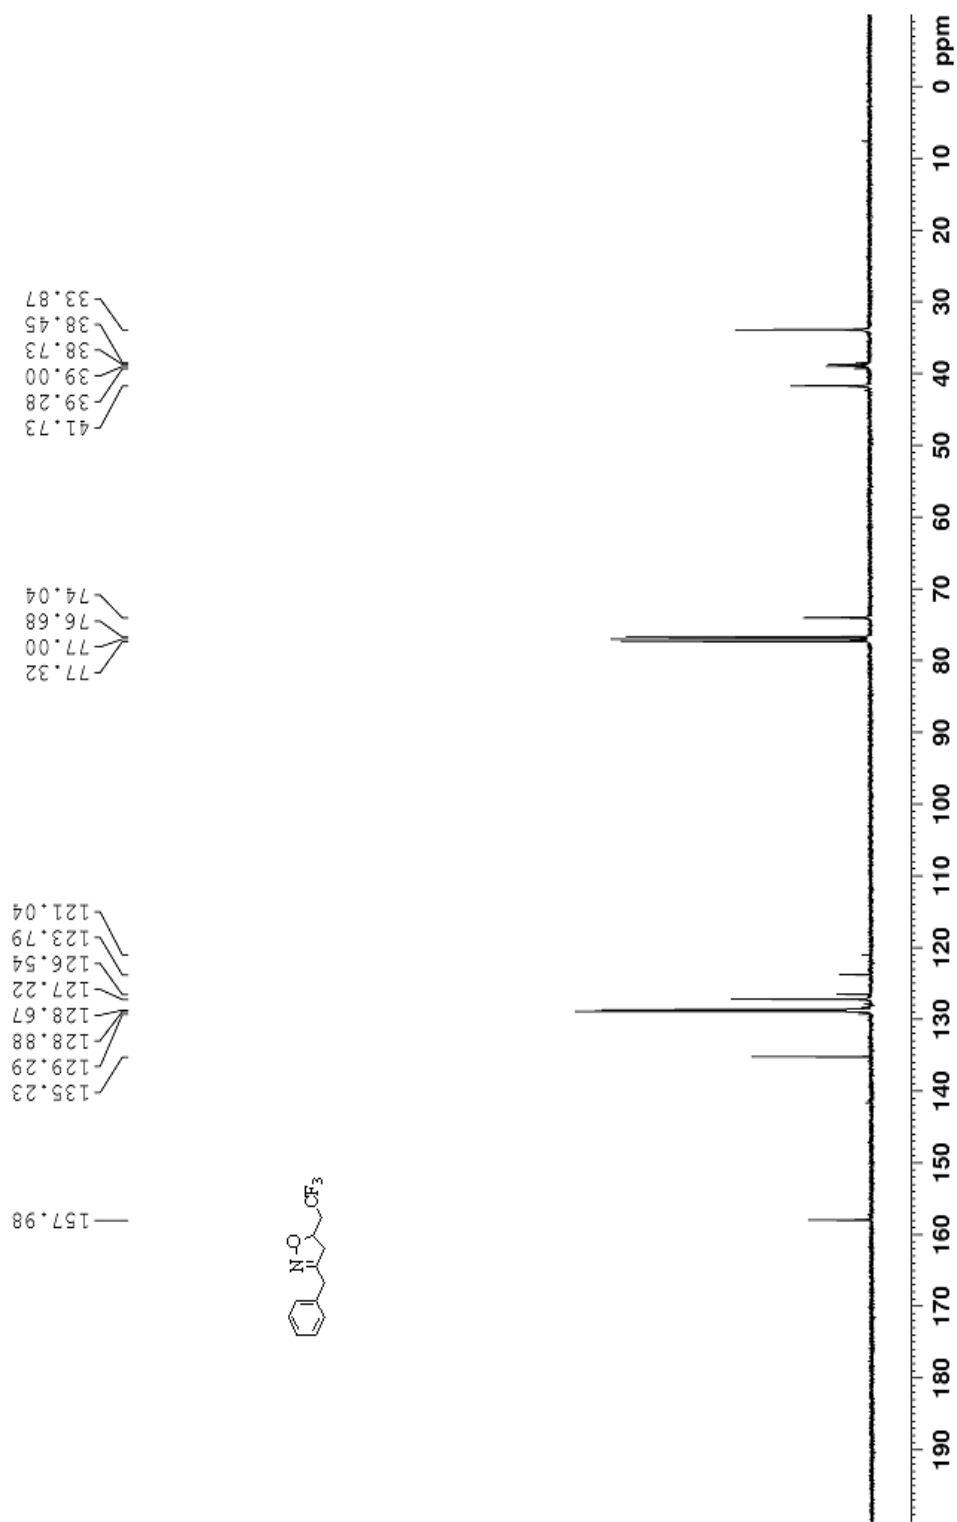

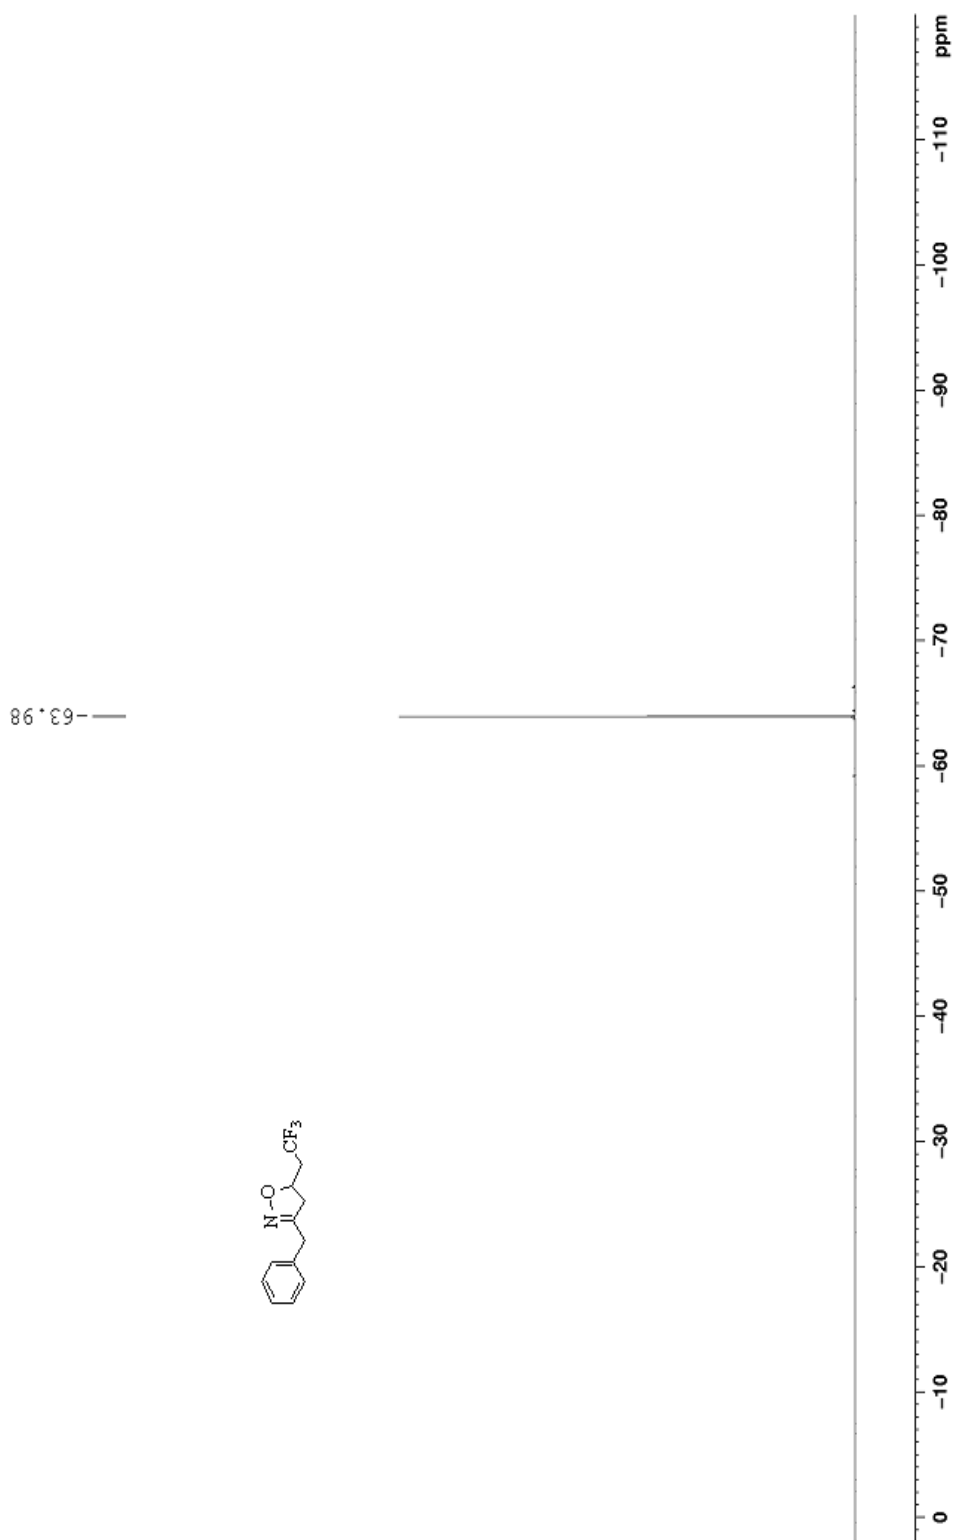

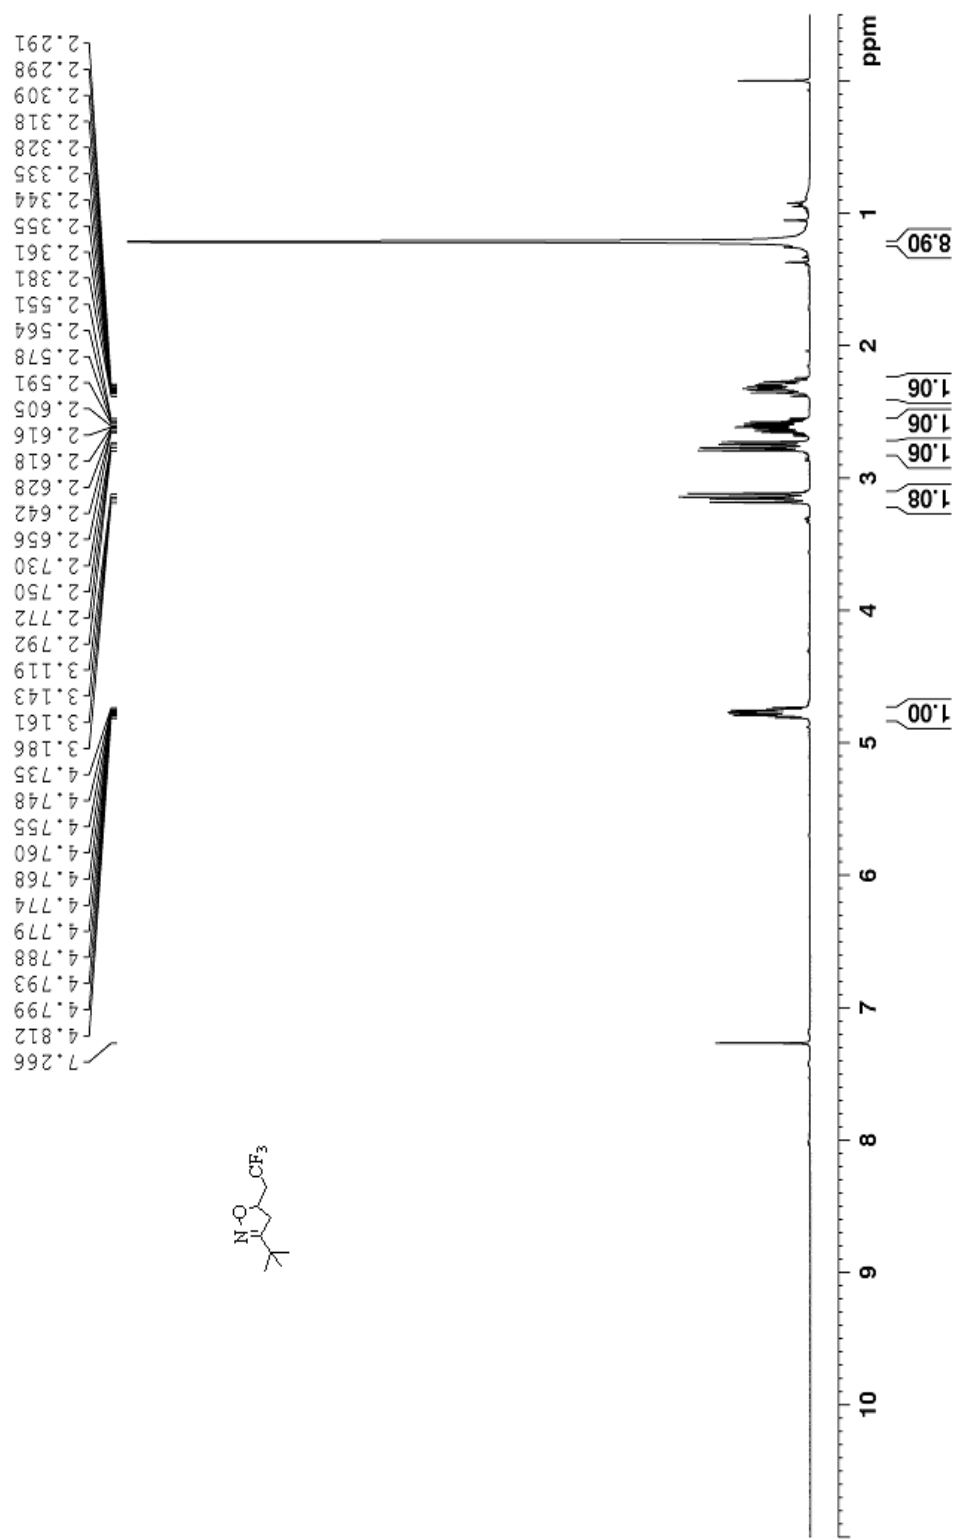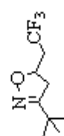

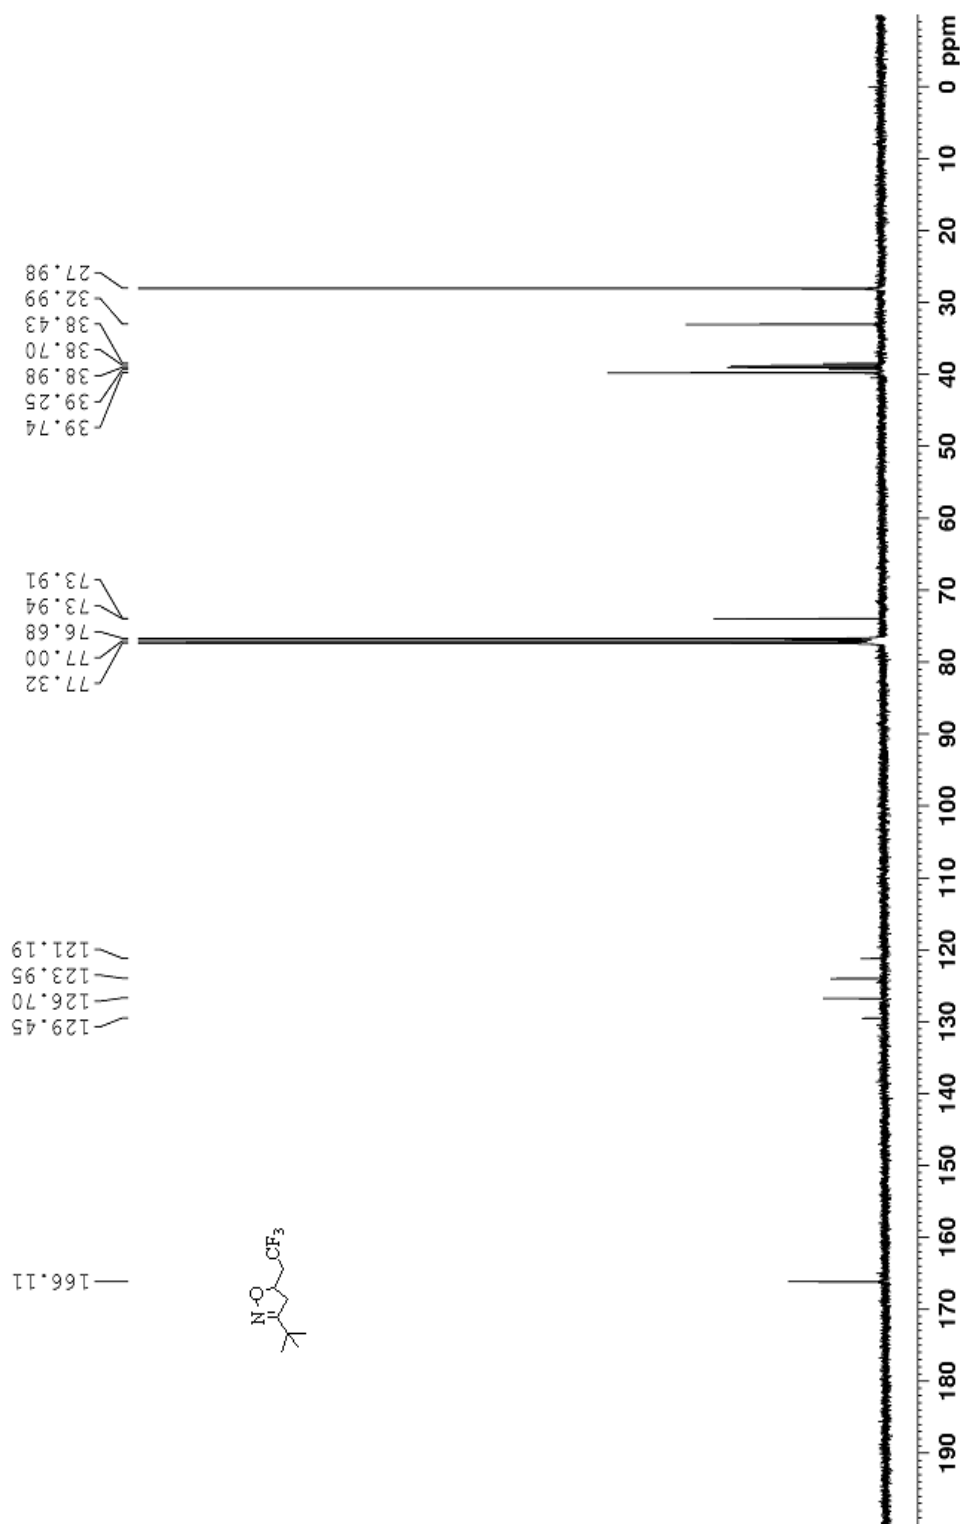

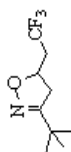



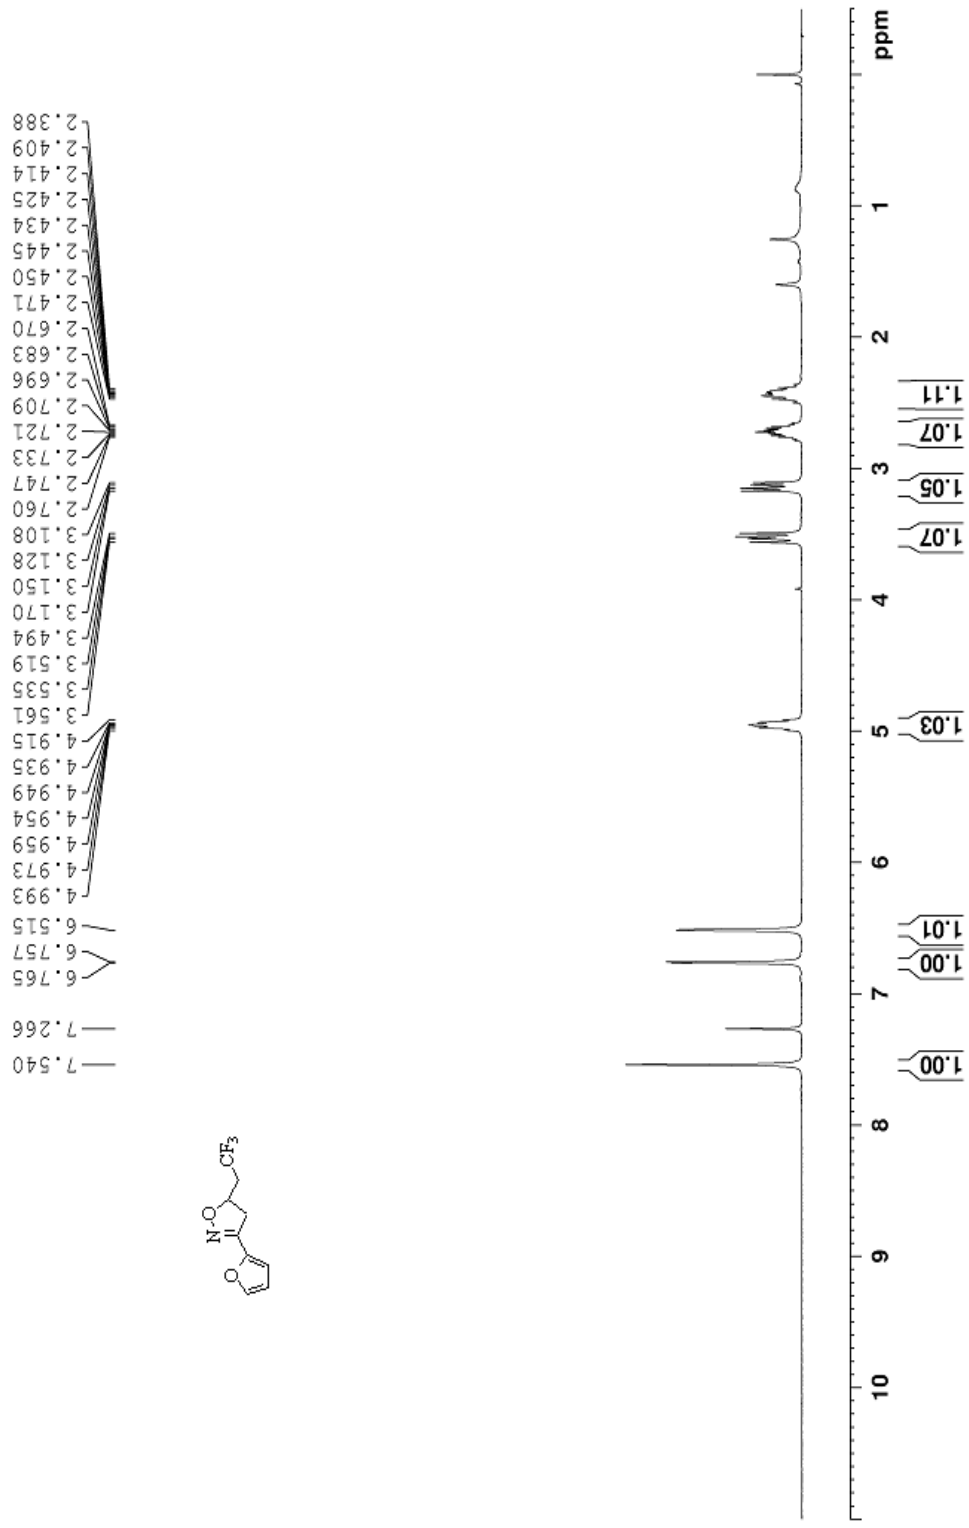

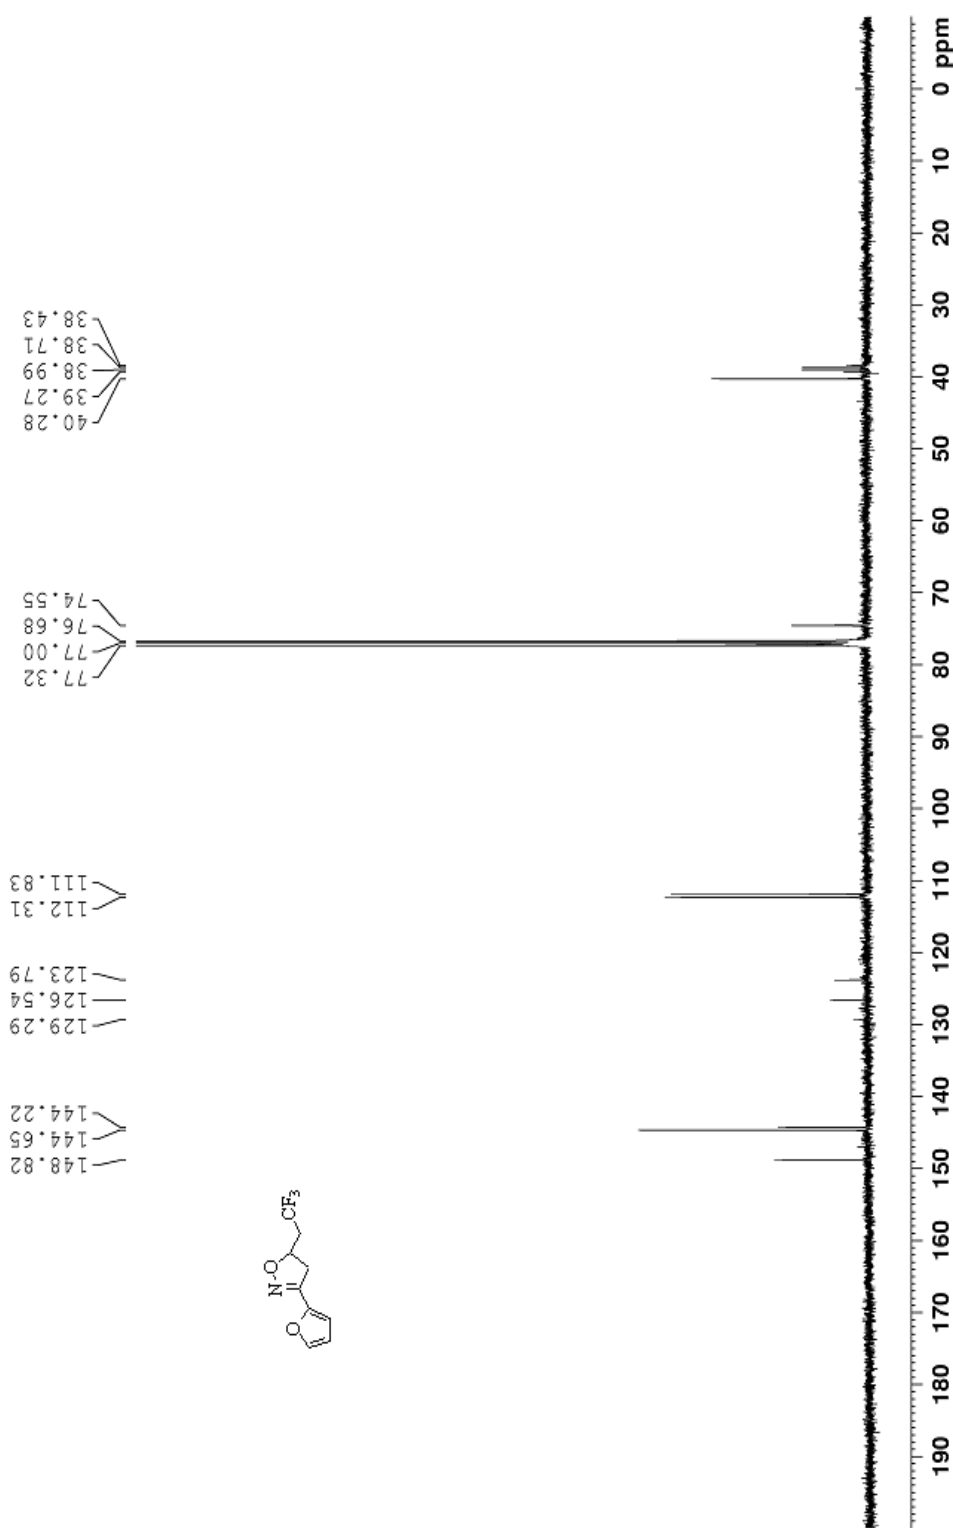

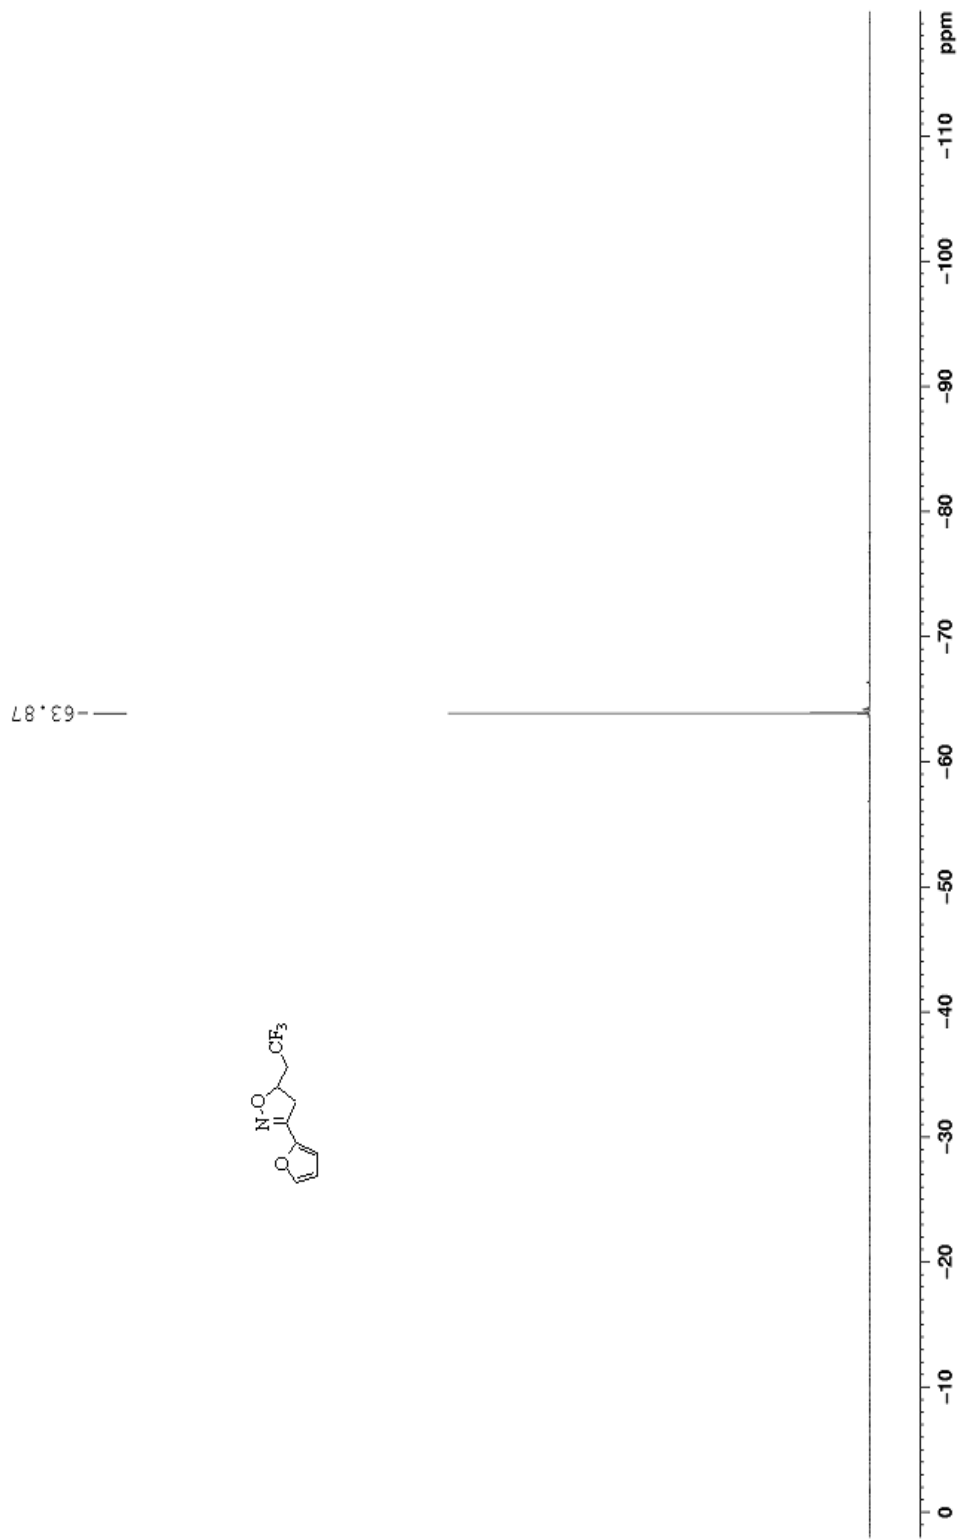

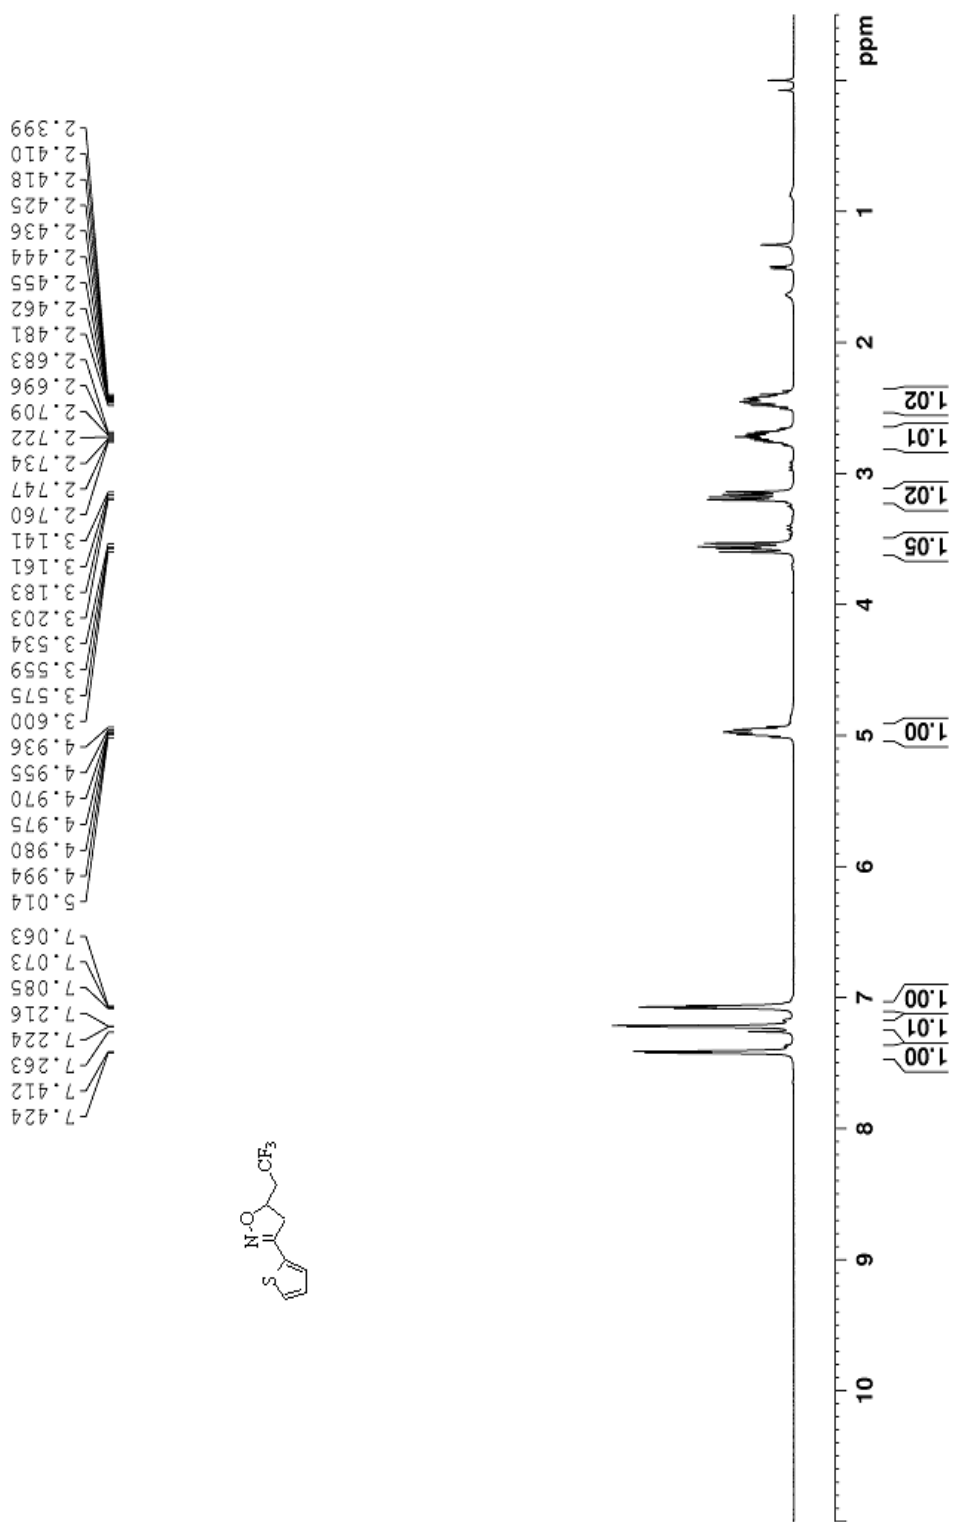

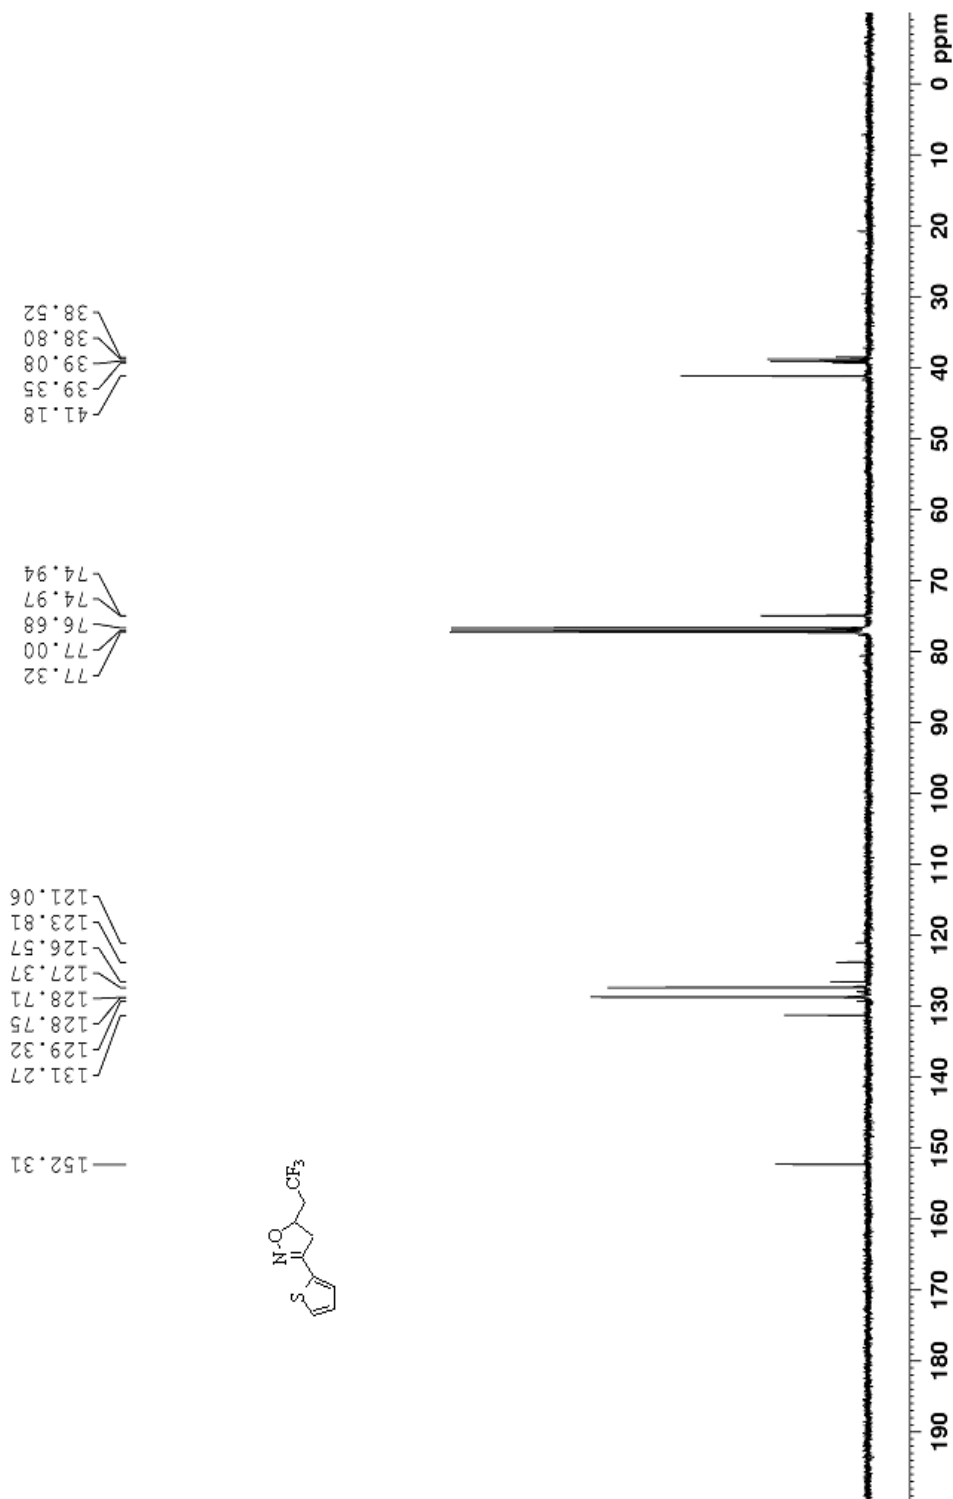

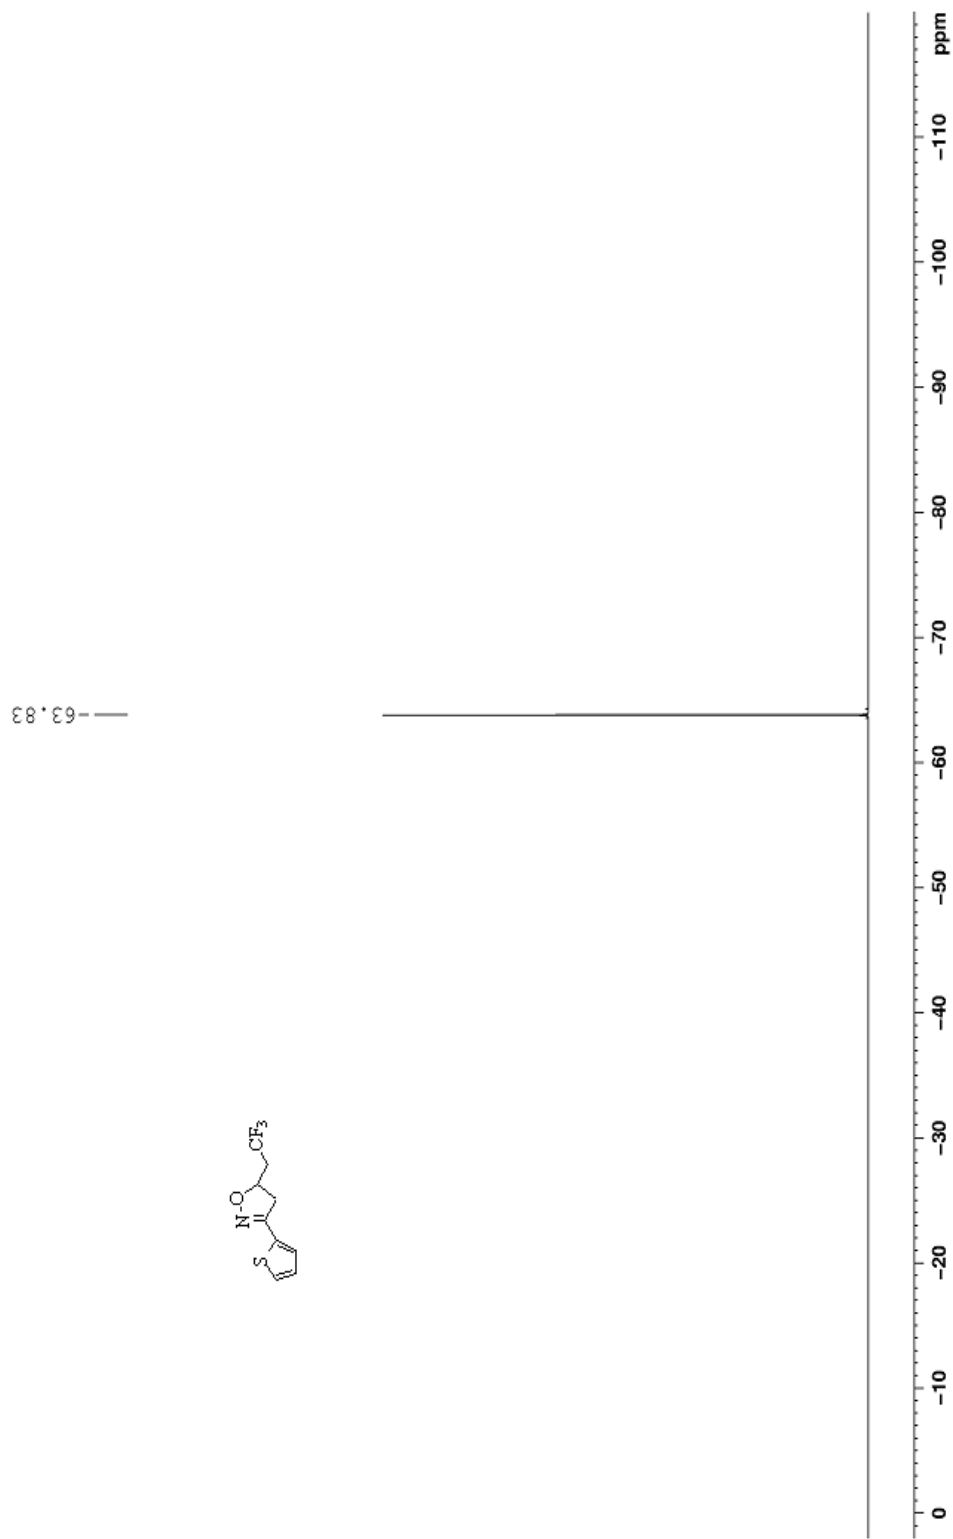

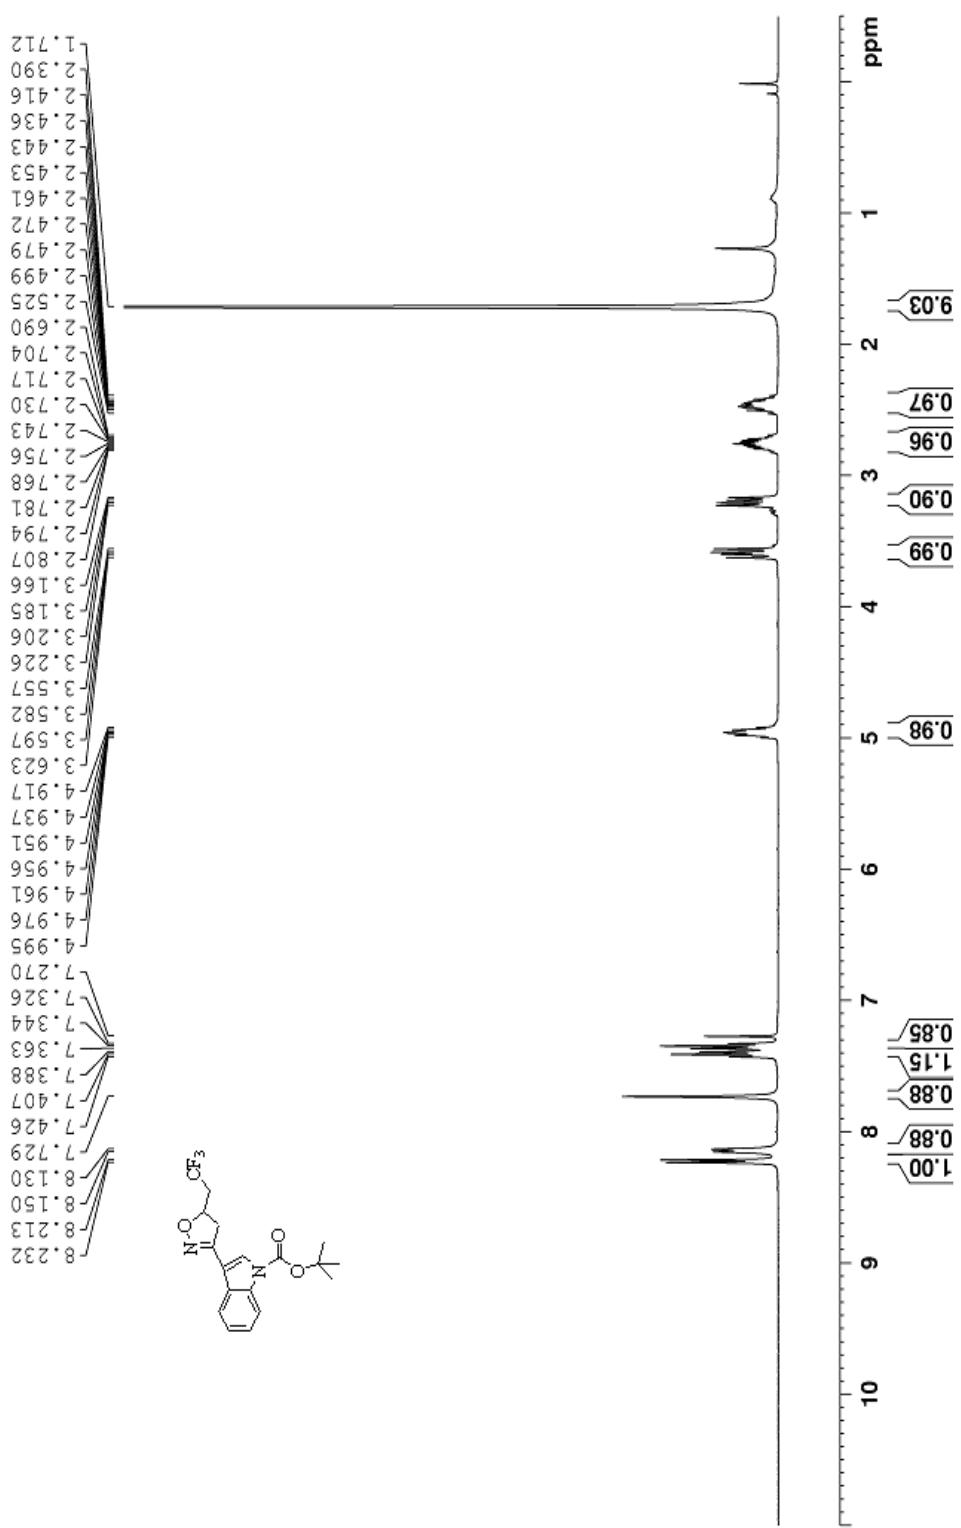

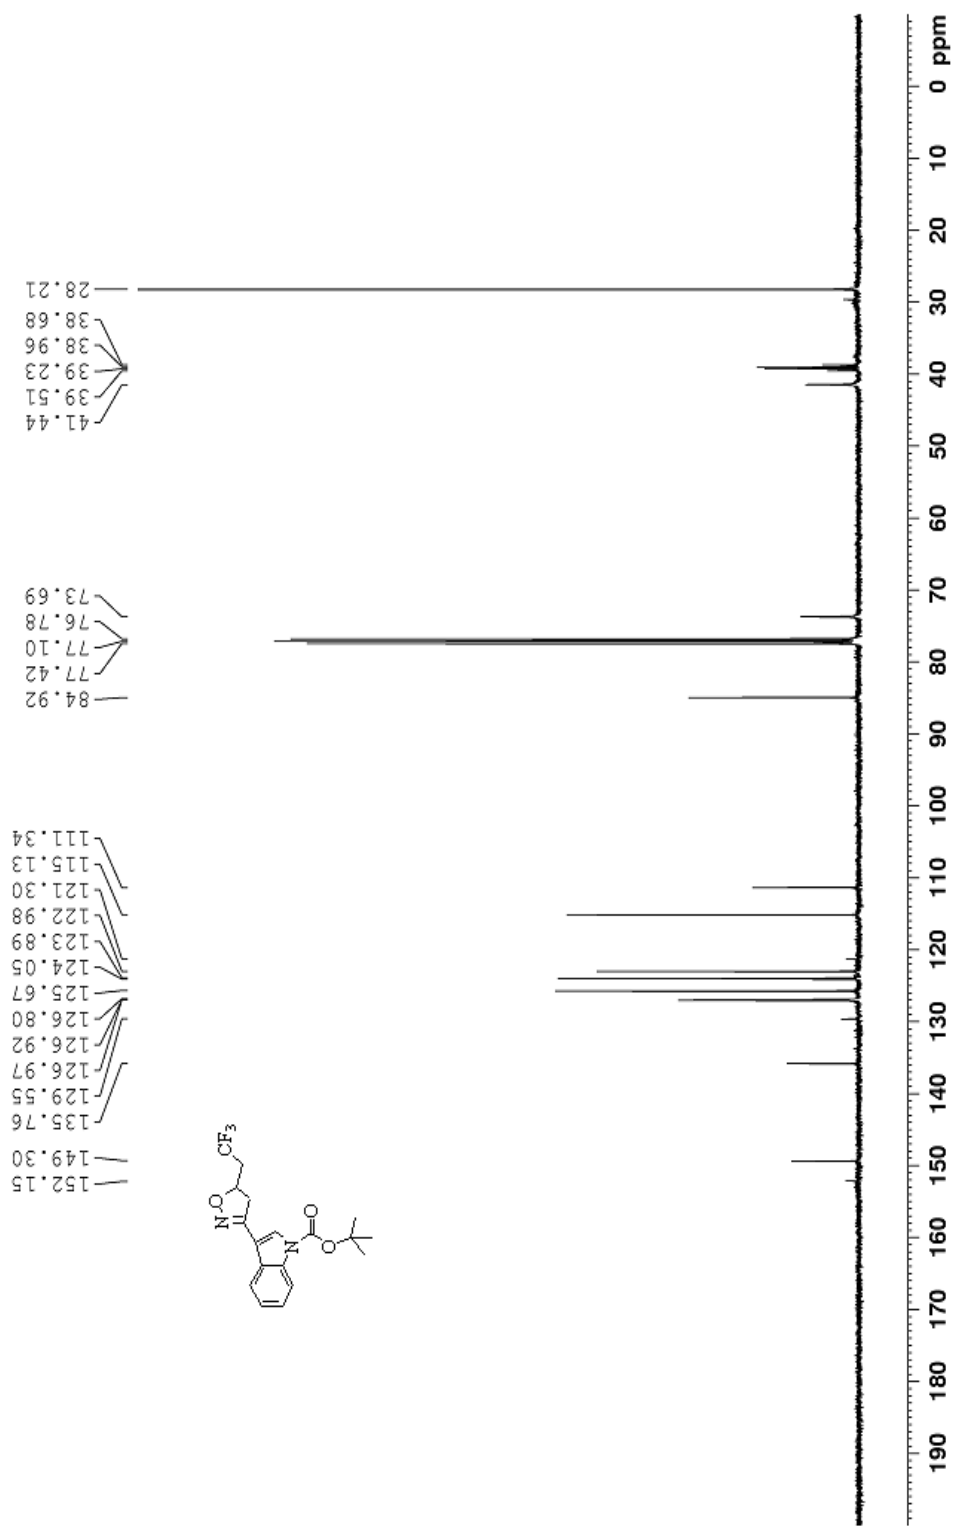



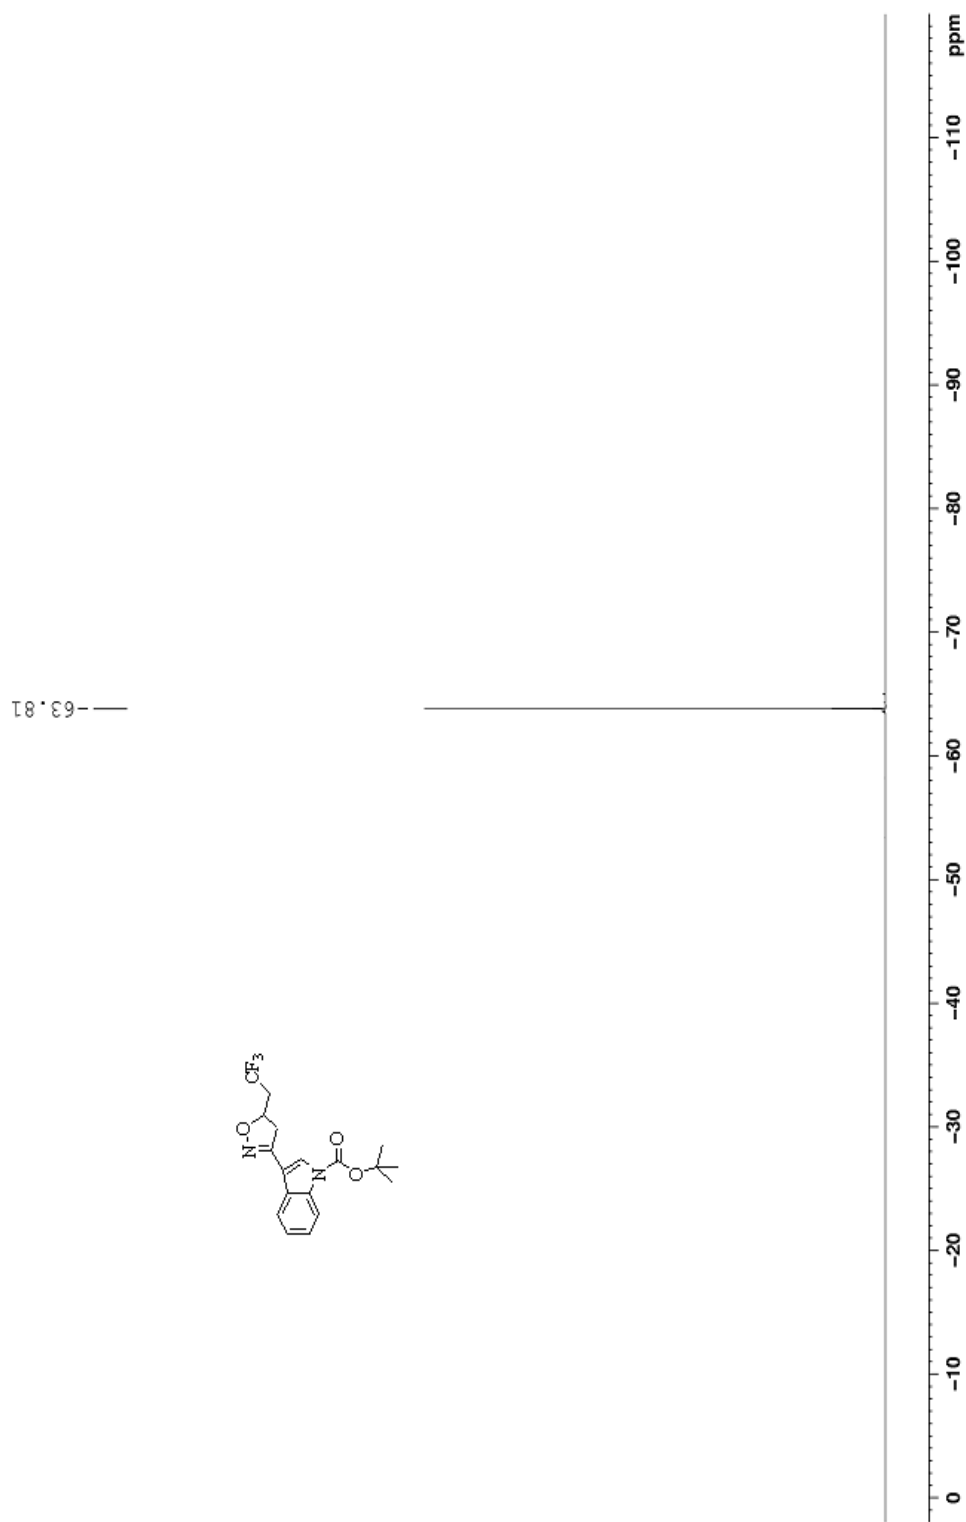

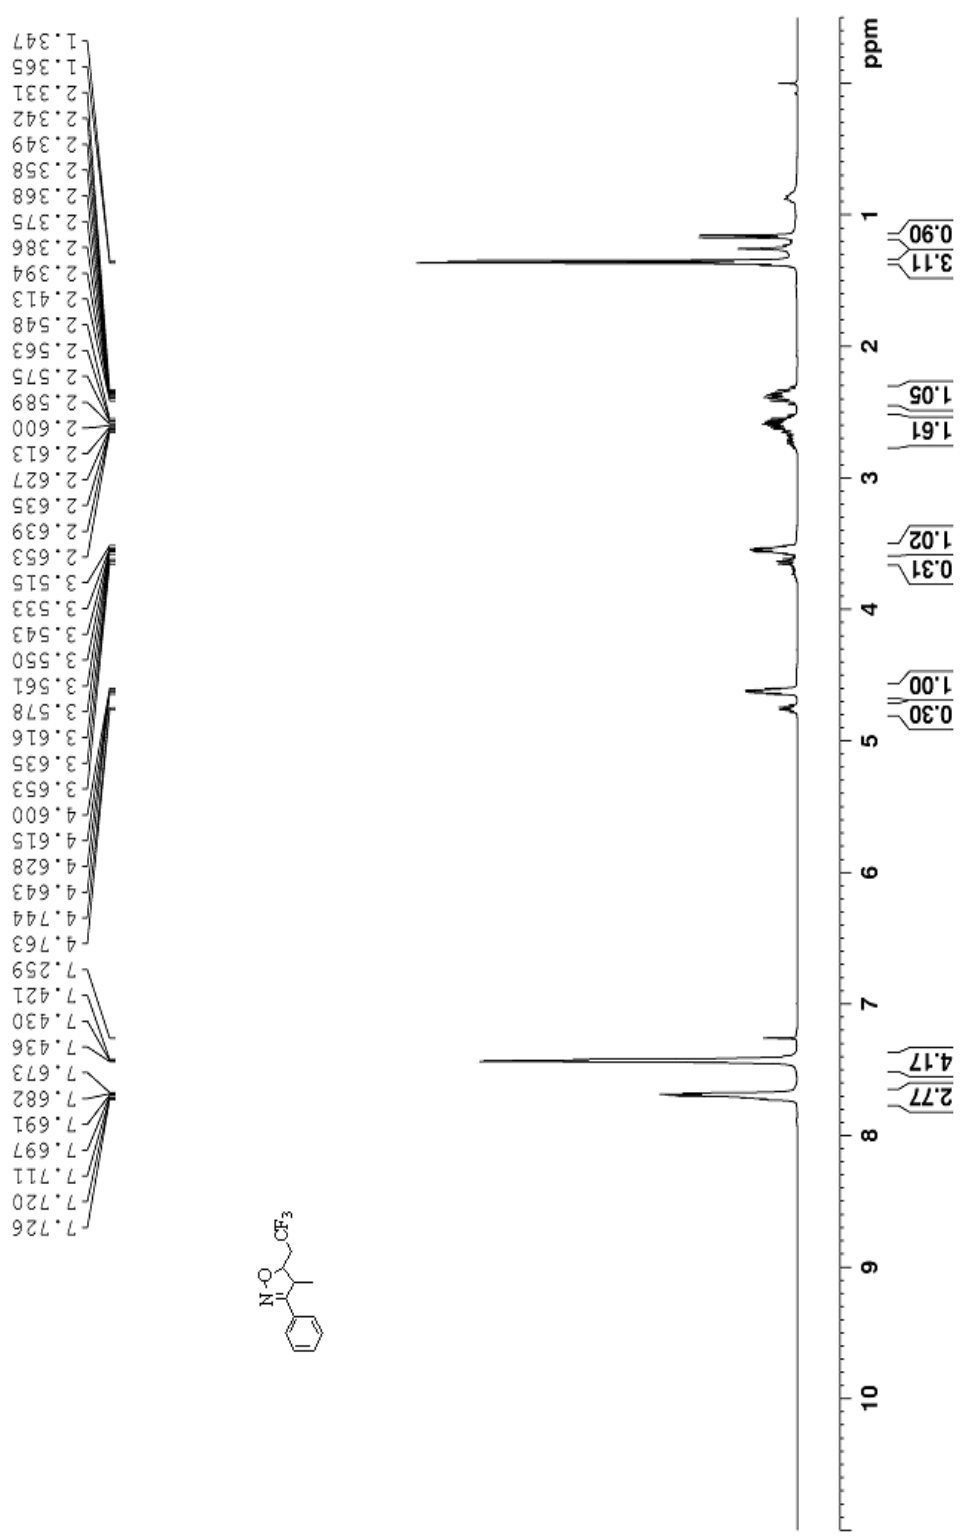

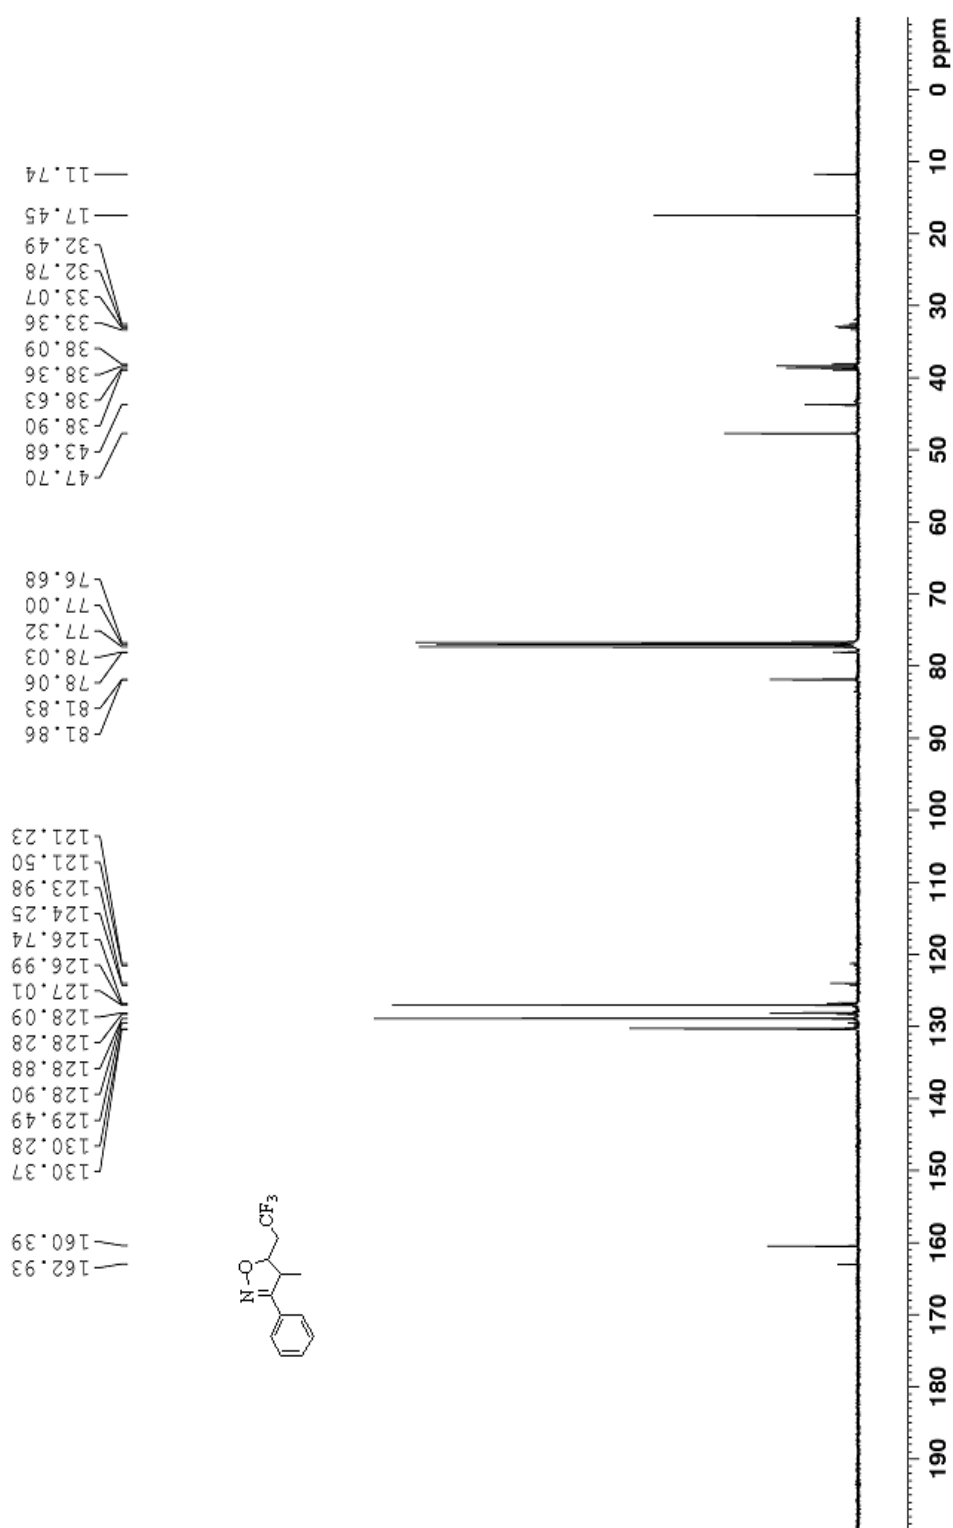

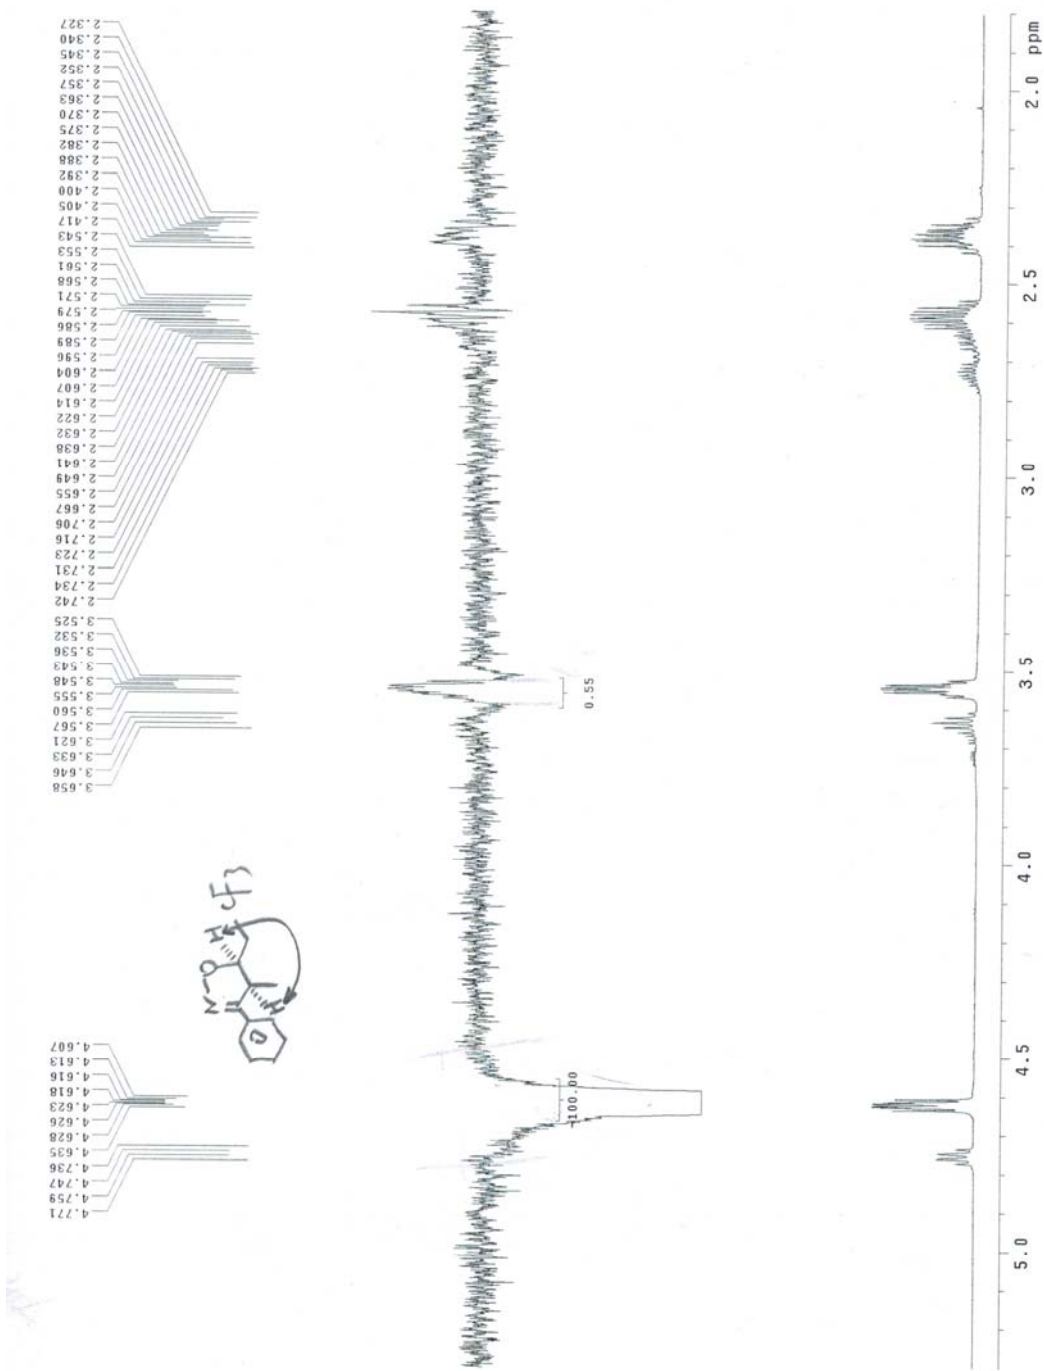

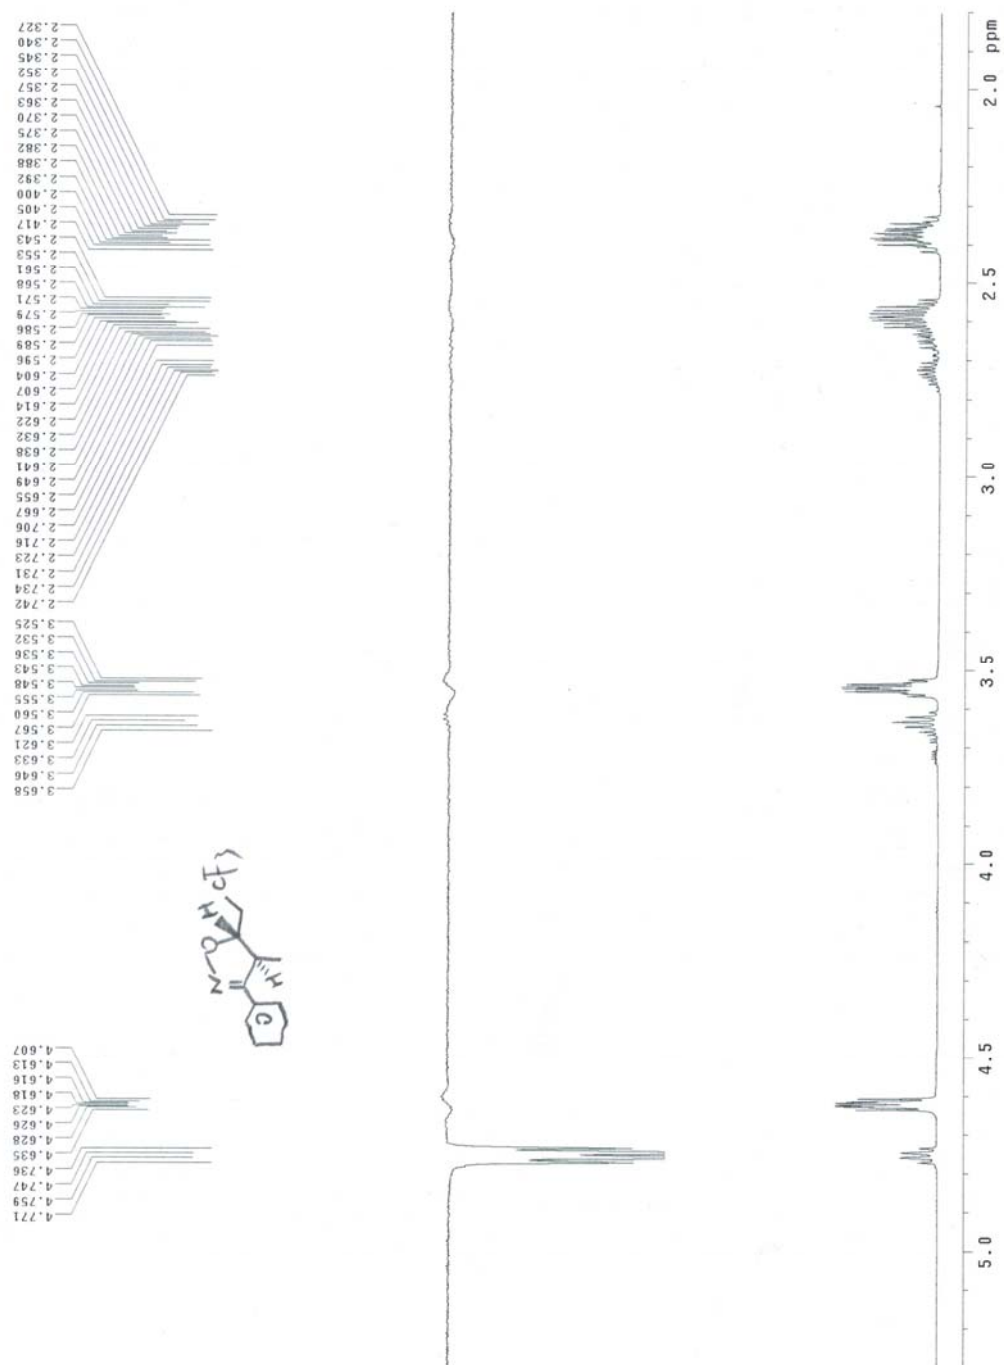

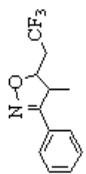

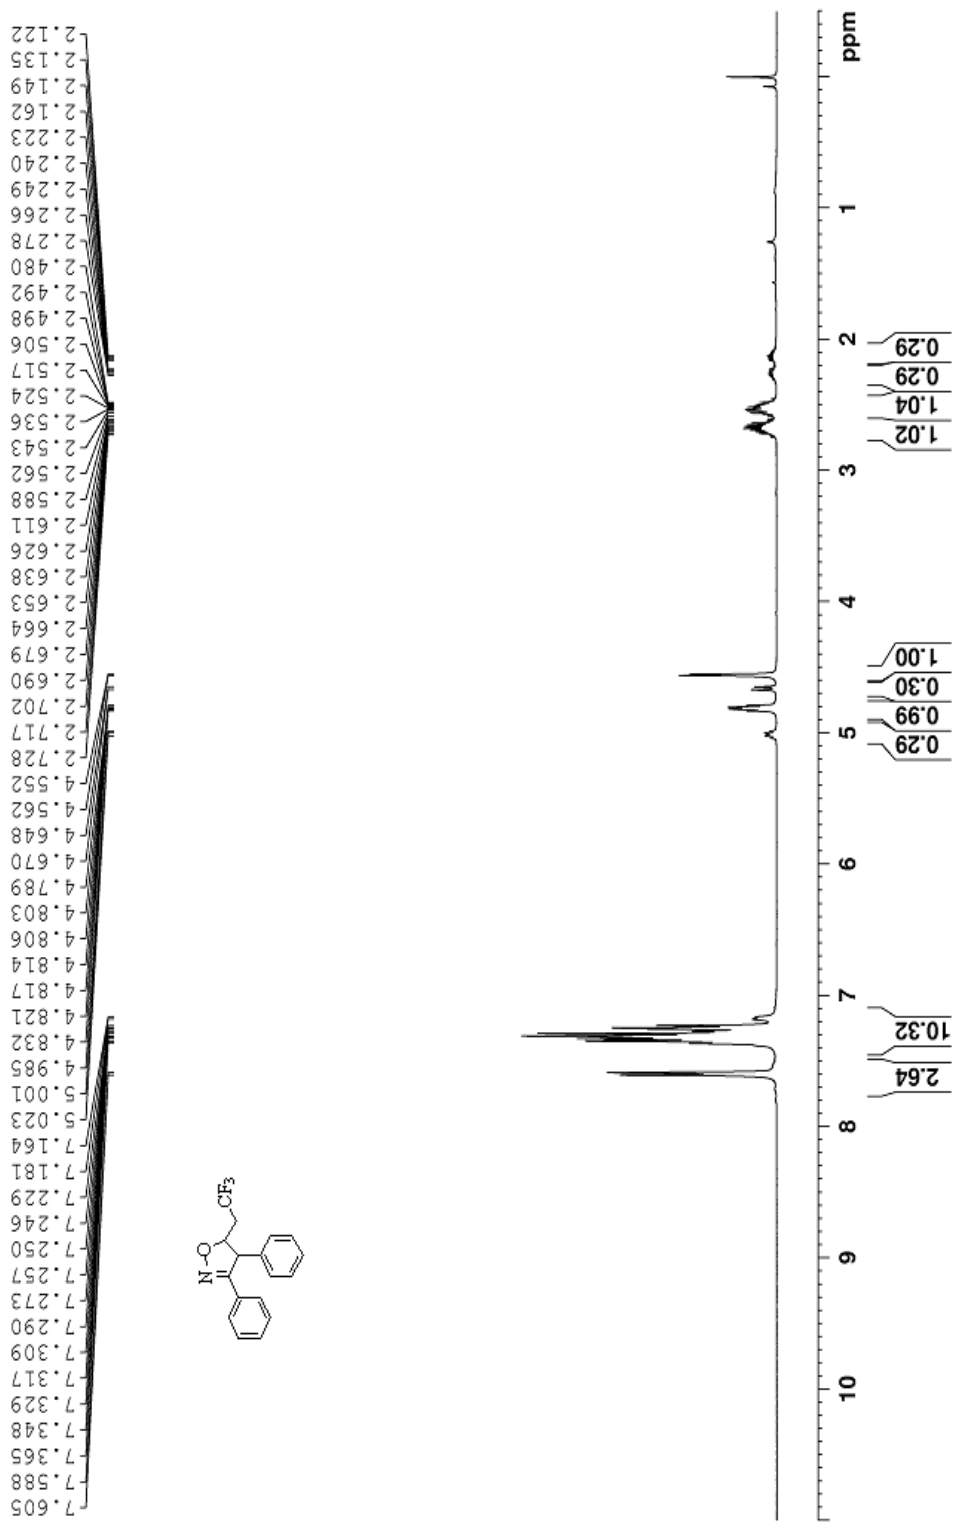

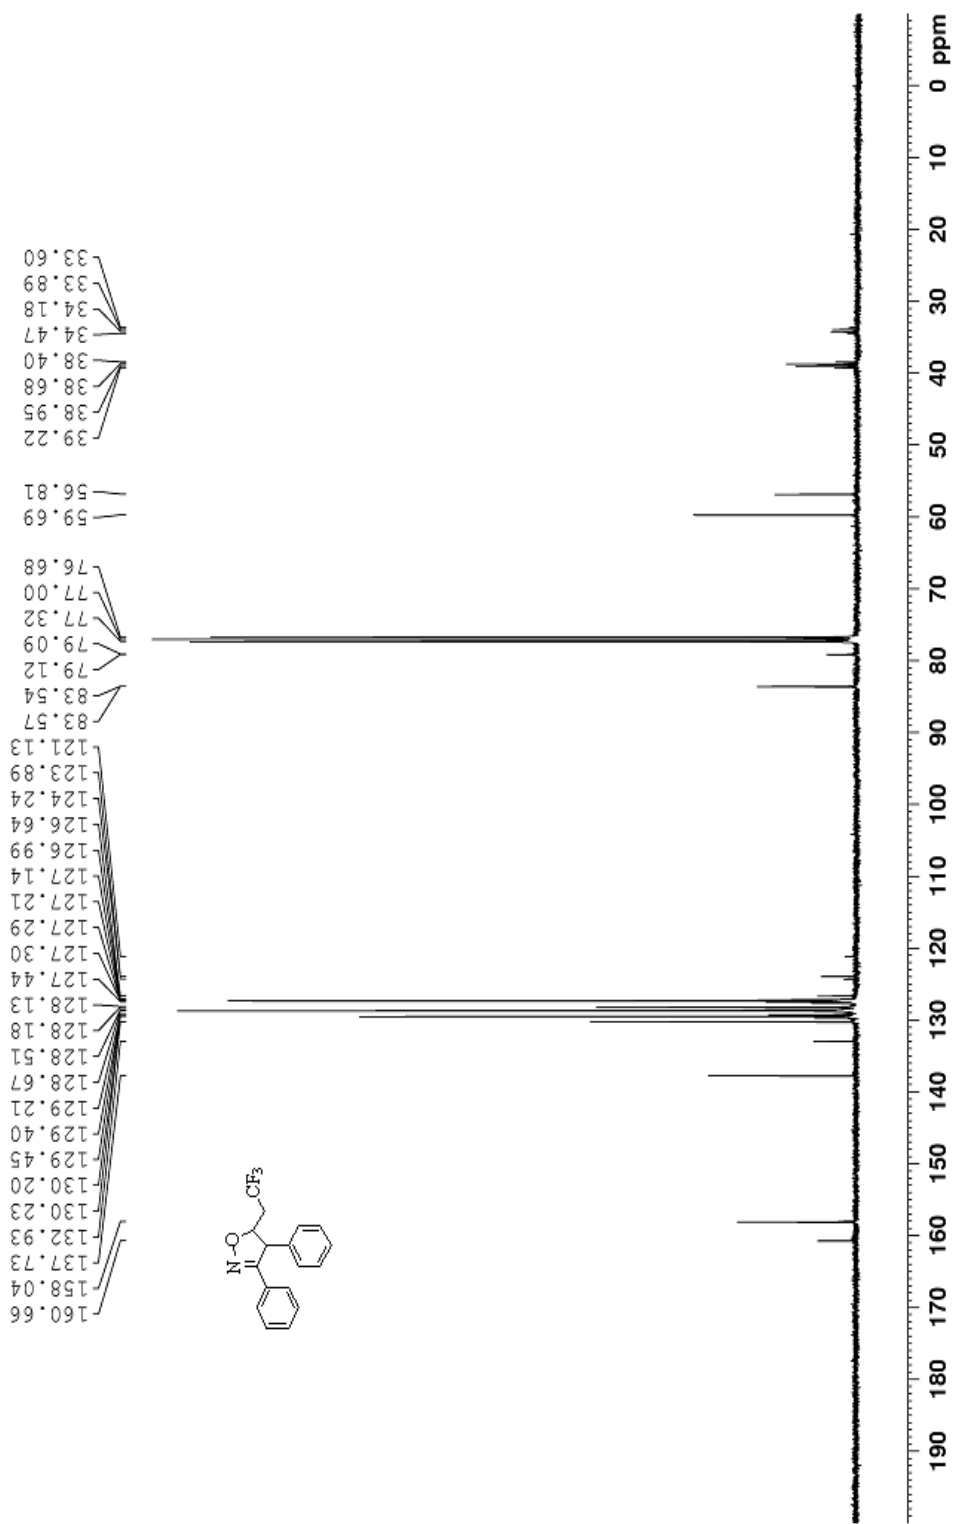



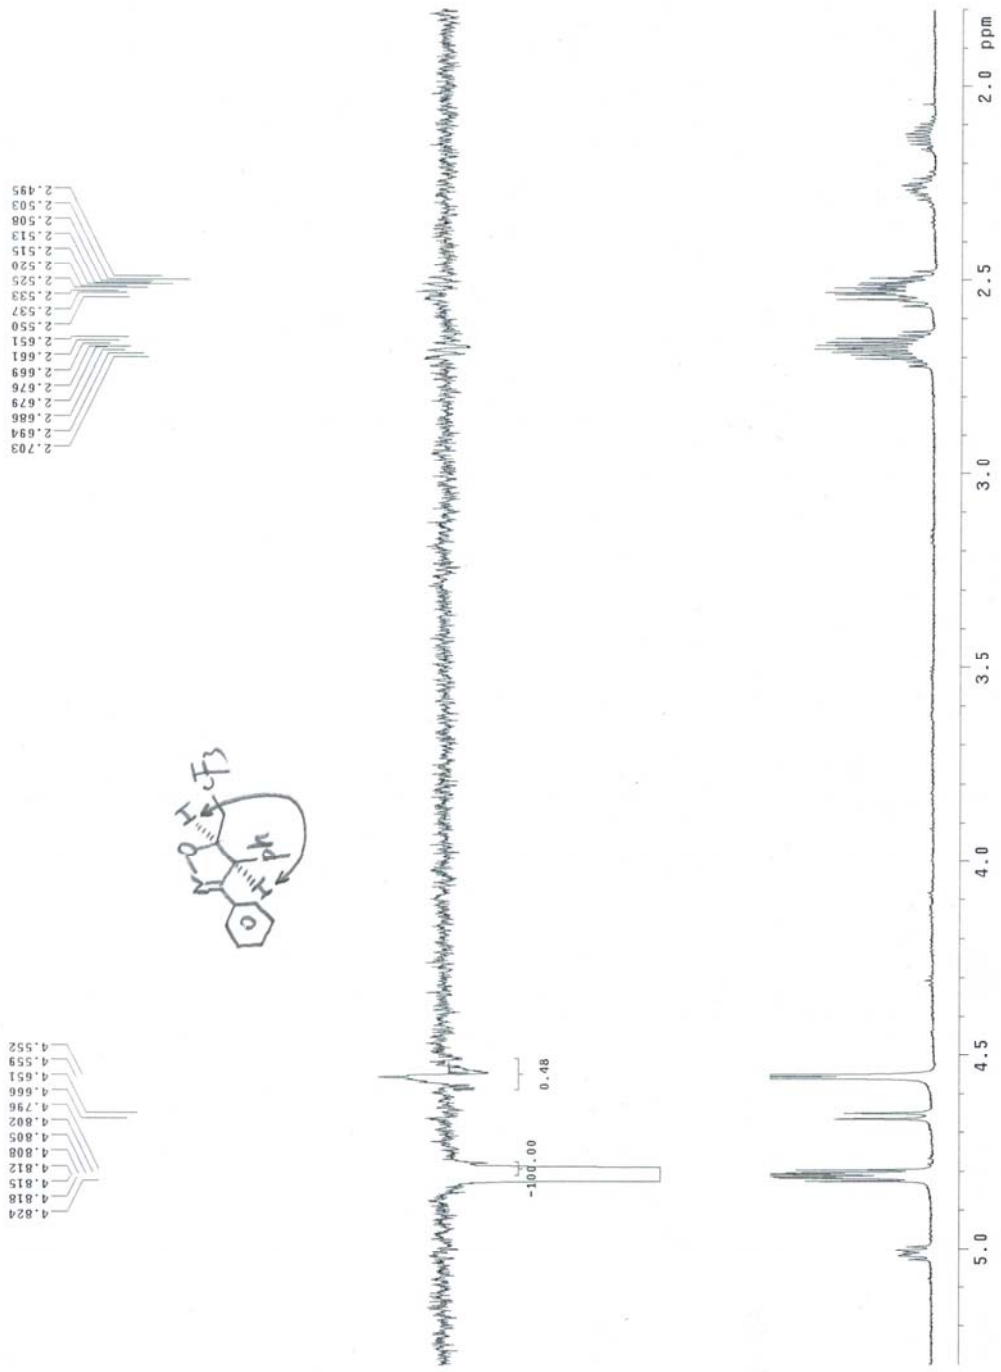

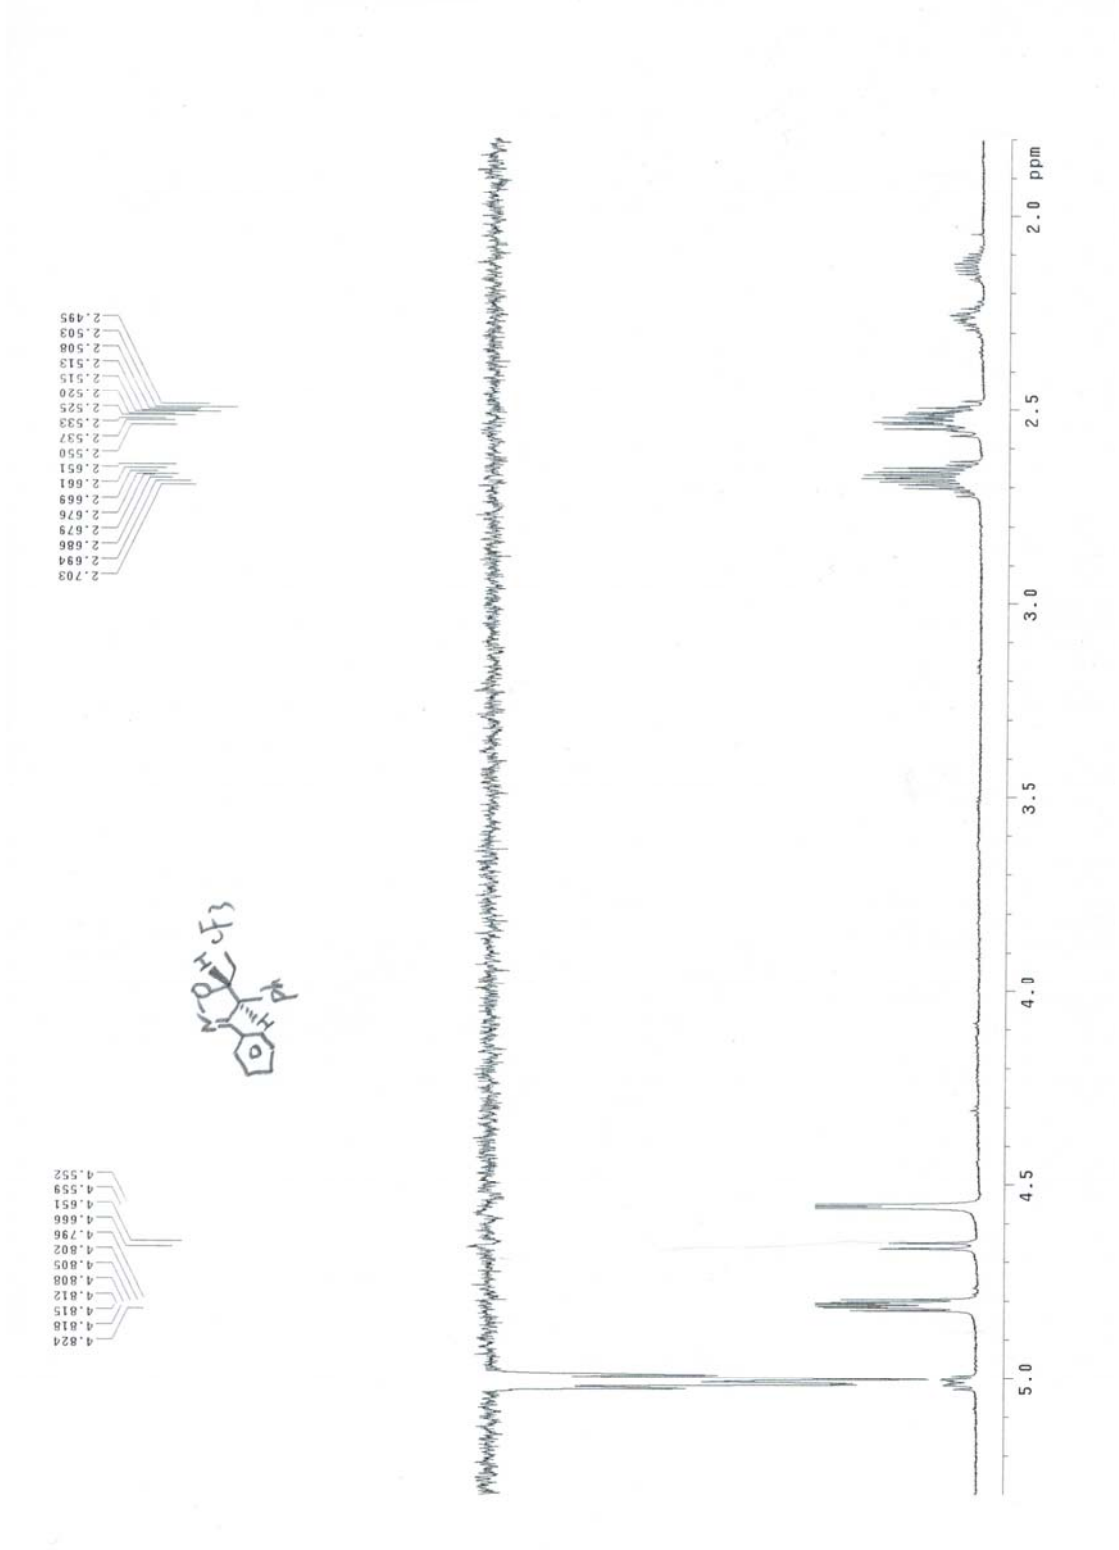

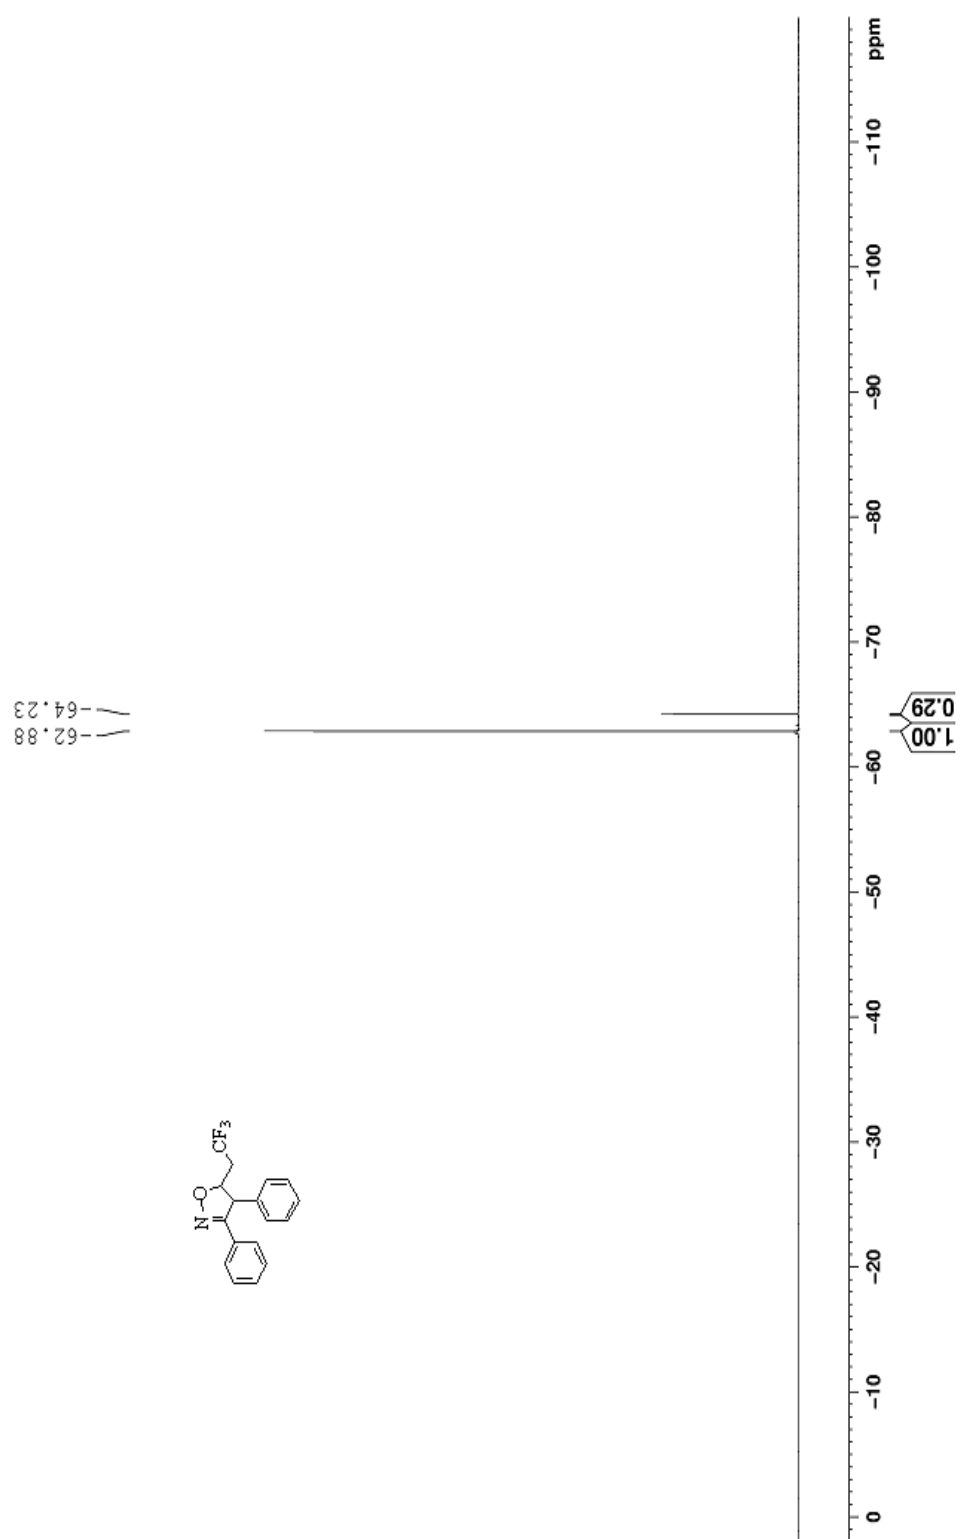

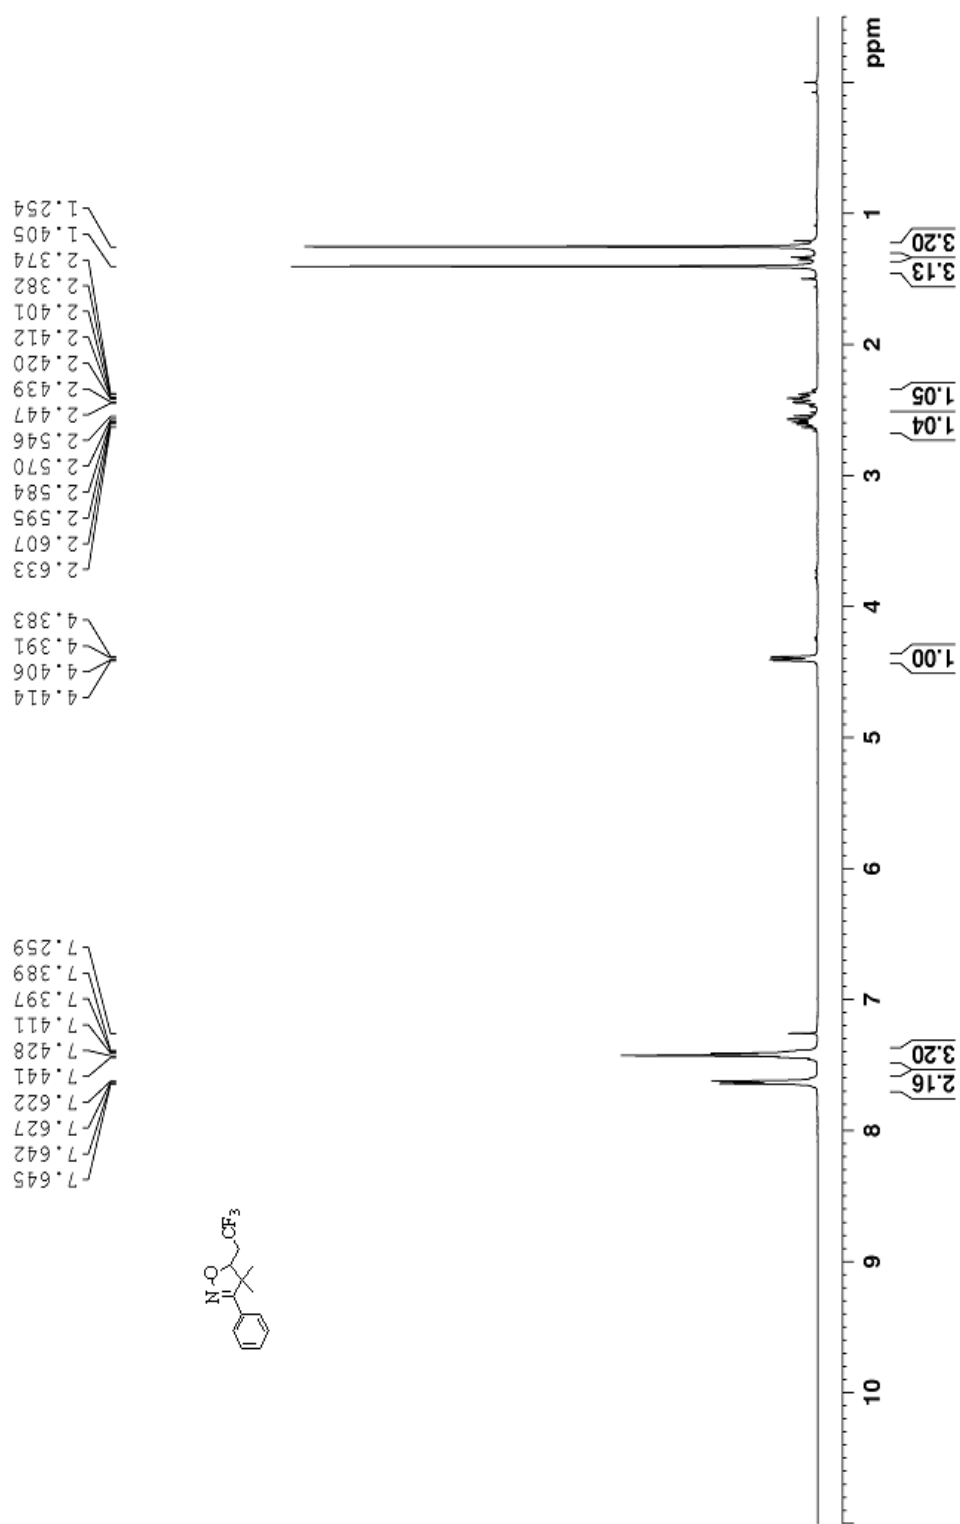

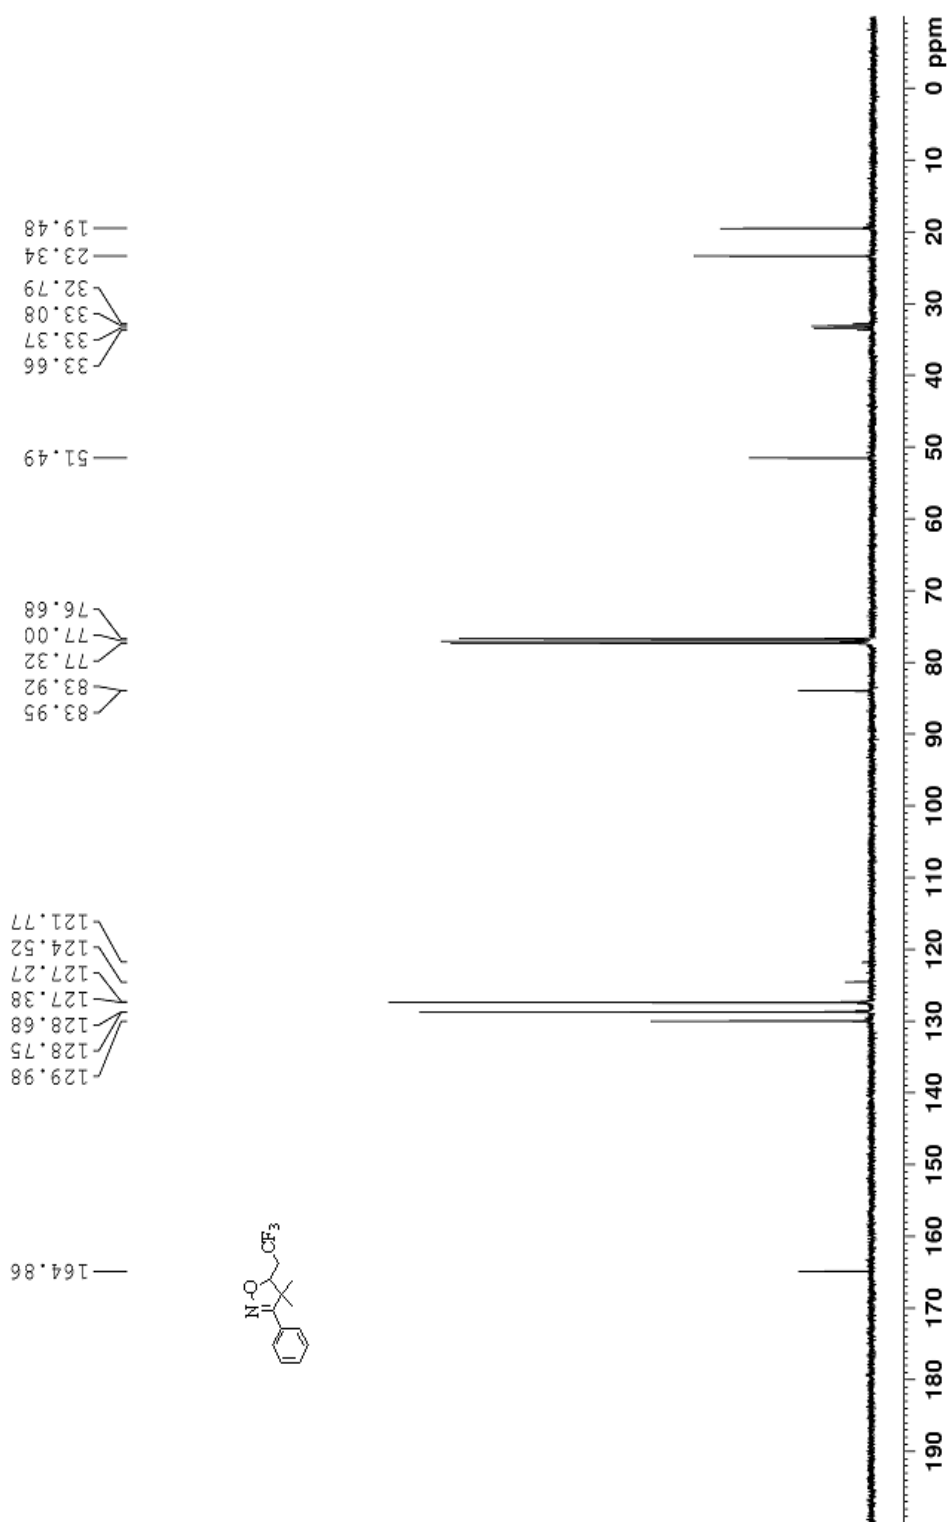

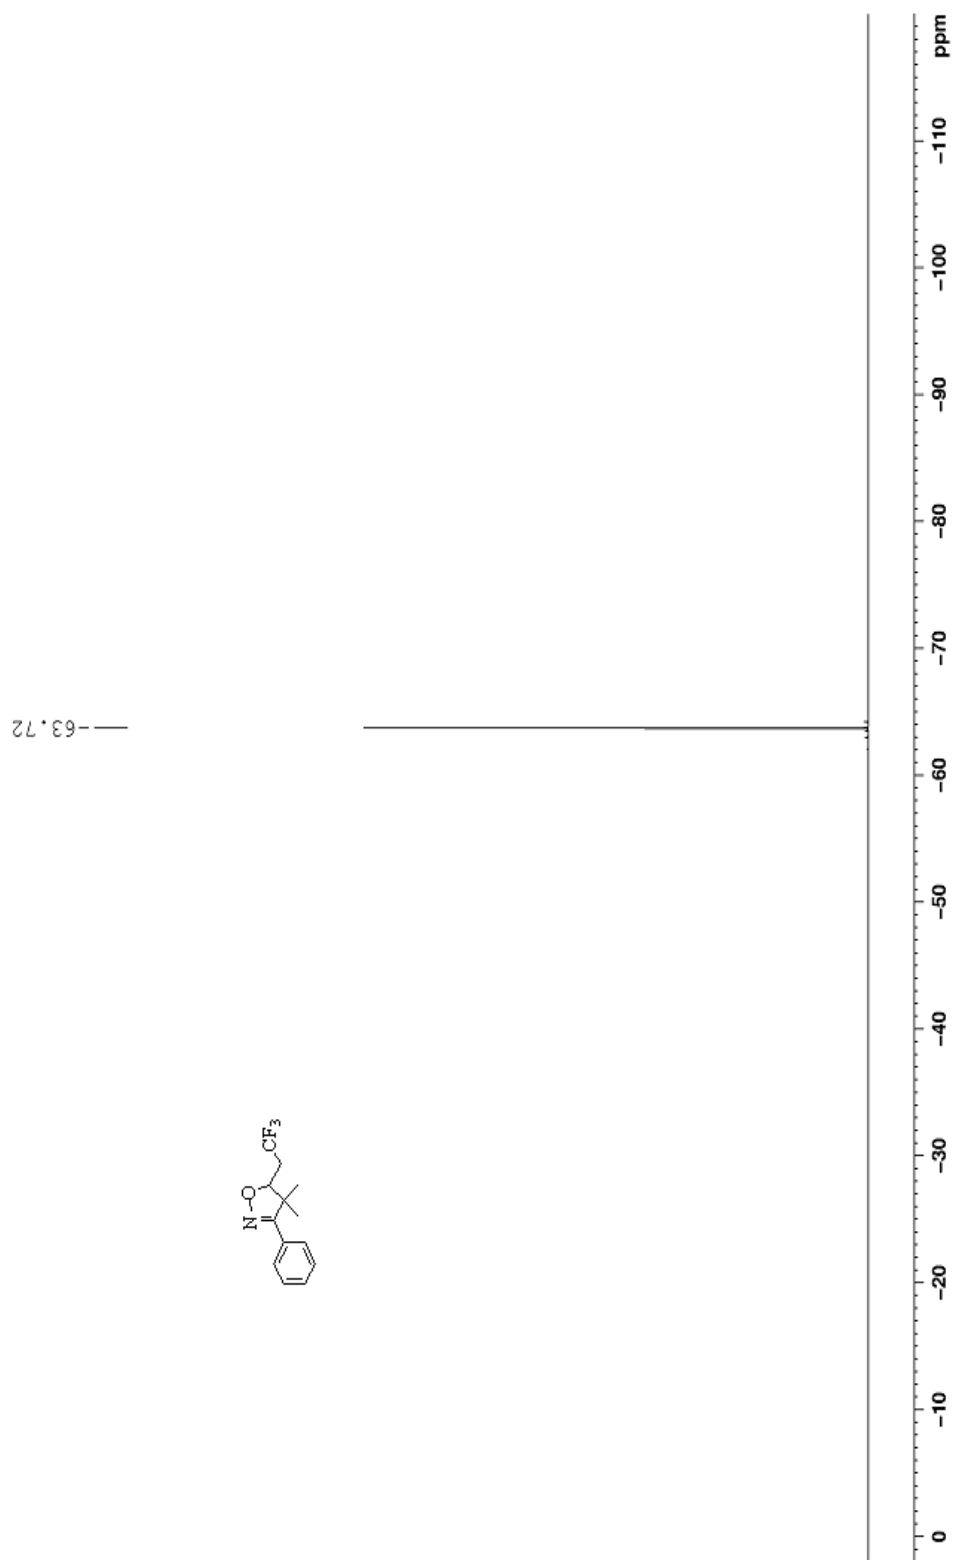

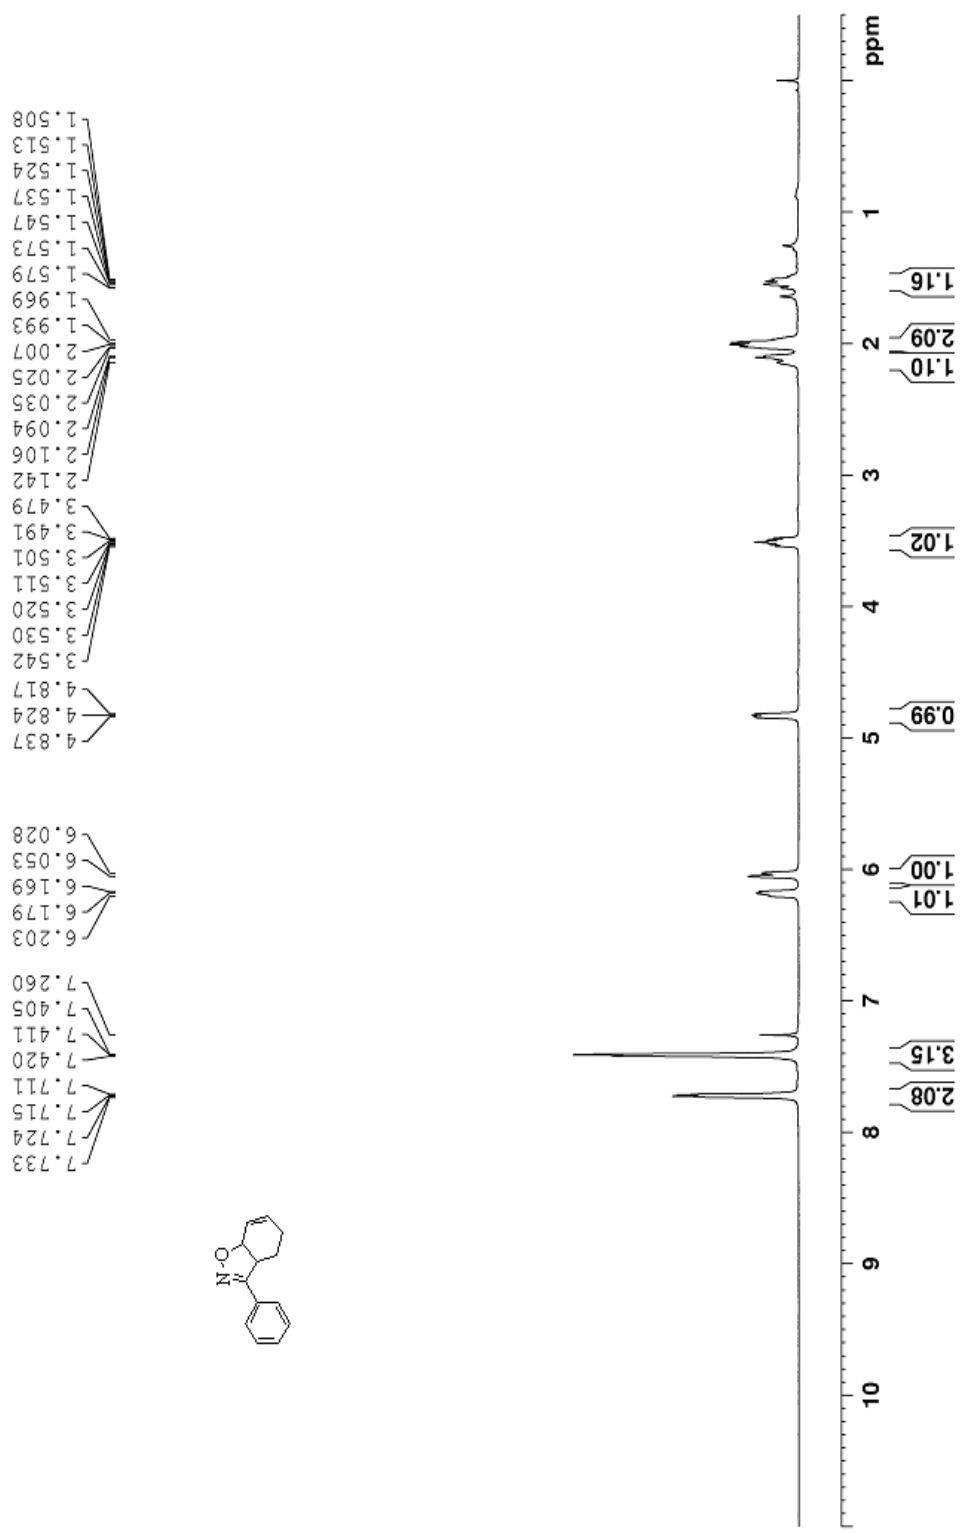

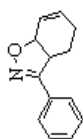



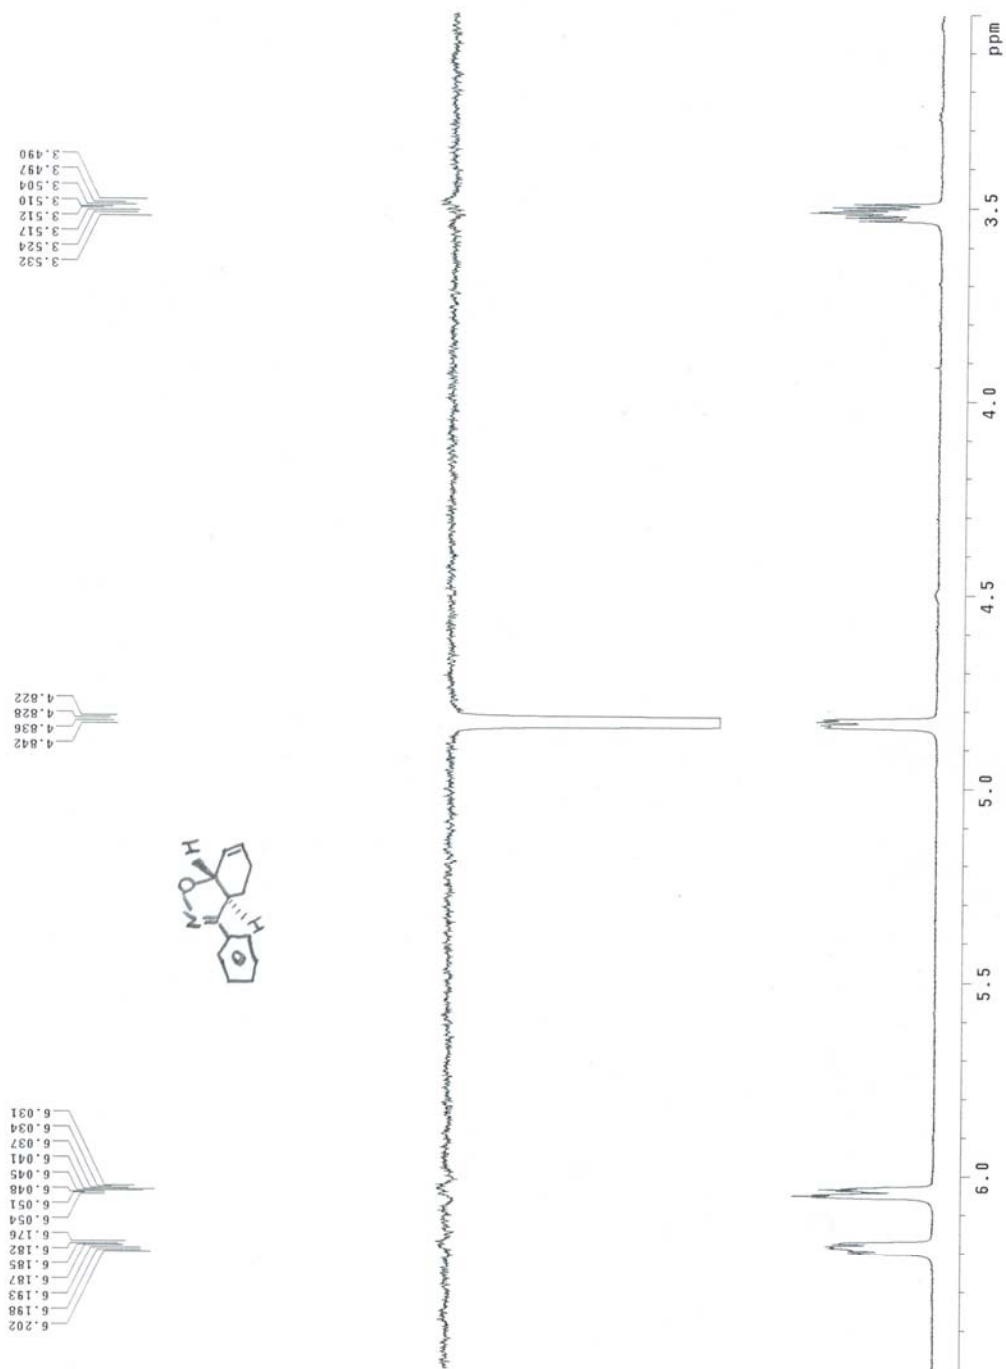

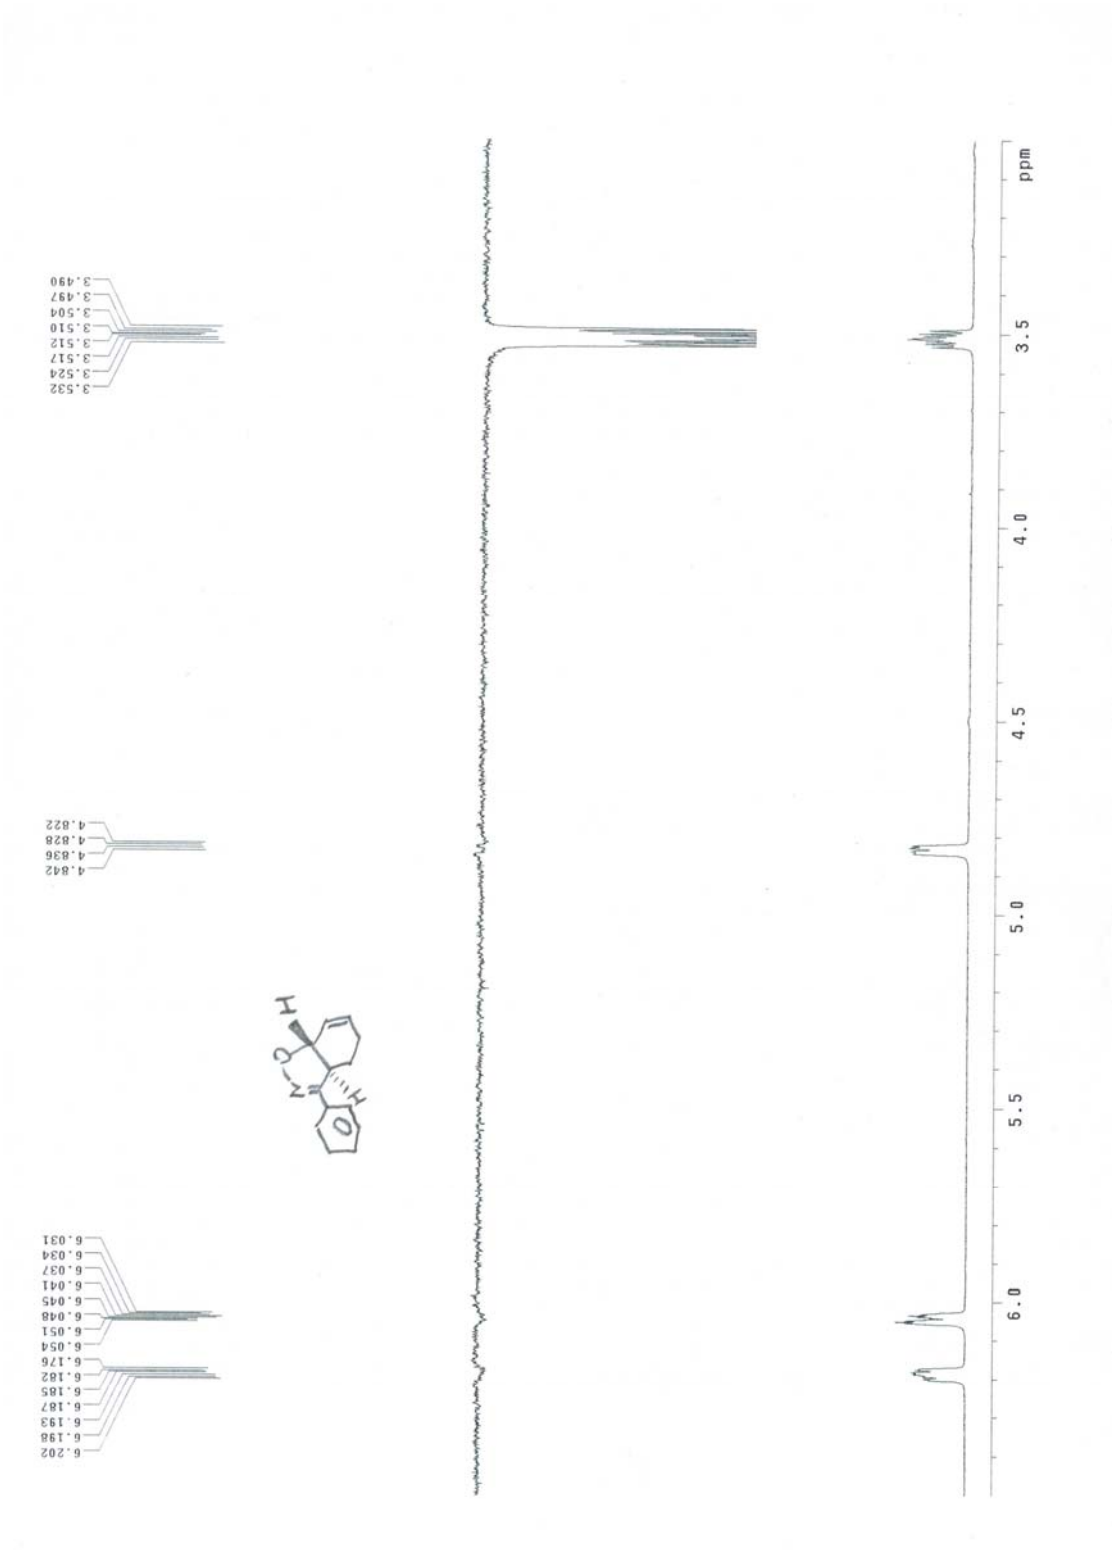

Supplement: c3cc42588f.pdf [file c3cc42588f.pdf]
